# Supplementary material for: Introduction of TiO2-[bip]-NH2+ C(NO2)3− as an effective nanocatalyst for the Hantzsch reactions
Source: Royal Society of Chemistry journal article supplement (doi:10.1039/d2nj04622a), 2022-01-01
Supplement: d2nj04622a1.pdf [file d2nj04622a1.pdf]

## Supporting Information

### **Introduction of $\text{TiO}_2$ -[bip]- $\text{NH}_2^+ \text{C}(\text{NO}_2)_3^-$ as an effective nanocatalyst for the Hantzsch reactions**

Leyla Nazemi Nasirmahale <sup>a</sup>, Farhad Shirini <sup>\*,a</sup>, Yadollah Bayat <sup>b</sup>, Masoumeh Mazloumi <sup>a</sup>

*Department of Chemistry, College of Science, University of Guilan, Rasht, zip code 41335, I.R. Iran*

Post Box: 1914, I. R. Iran. Tel./Fax: +98 131 3233262, E-mail address: shirini@guilan.ac.ir

**The spectral data of the selected compounds are as follow:**

**Ethyl 4-(4-chlorophenyl)-2,7,7-trimethyl-5-oxo-1,4,5,6,7,8-hexahydroquinoline-3-carboxylate (1a; Fig. S1- Fig. S3):** m.p.= 242-245 °C., FT-IR (KBr, cm<sup>-1</sup>): 3284, 3212, 3075, 2948, 1698, 1611, 1481, 1377, 1227, 1079, 828 cm<sup>-1</sup>, <sup>1</sup>H NMR (400 MHz, CDCl<sub>3</sub>) δ= 0.948 (s, 3H, CH<sub>3</sub>), 1.086 (s, 3H, CH<sub>3</sub>), 1.219 (t, *J*=7.2 Hz, 3H, CH<sub>3</sub>), 2.14-2.34 (m, 4H, CH<sub>2</sub>), 2.38 (s, 3H, CH<sub>3</sub>), 4.08 (q, *J*= 7.2 Hz, 2H, CH<sub>2</sub>), 5.04 (s, 1H, CH), 6.5 (br, 1H, NH), 7.18 (d, *J*= 8.3 Hz, 2H, ArH), 7.28 (d, *J*= 8.2 Hz, 2H, ArH) ppm; <sup>13</sup>CNMR (101 MHz) δ= 14.5, 18.7, 26.8, 29.5, 32.5, 36.0, 50.6, 59.5, 103.5, 110.1, 128.1, 129.7, 130.6, 145.8, 147.0, 150.0, 167.1, 194.7; CHN analysis (%): C: 68.6, H: 7.17, N: 4.25.

**Ethyl 4-(2-chlorophenyl)-2,7,7-trimethyl-5-oxo-1,4,5,6,7,8-hexahydroquinoline-3 carboxylate (1b; Fig. S4- Fig. S6):** m.p.= 205–207 °C., FT-IR (KBr, cm<sup>-1</sup>): 3276, 3201, 3072, 2956, 1702, 1604, 1606, 1486, 1378 cm<sup>-1</sup>, <sup>1</sup>H NMR (400 MHz, DMSO-d<sub>6</sub>) δ= 0.84 (s, 3H), 1.00 (s, 3H), 1.07 (t, *J*= 7.1, 3H), 1.91 (d, *J*= 16.1, 1H), 2.13 (d, *J*= 16.1, 1H), 2.20-2.32 (m with s at 2.24, 4H), 2.41 (d, *J*= 17.0, 1H), 3.87-3.98 (m, 2H), 5.18 (s, 1H), 7.06 (t, *J*= 7.0, 1H), 7.15-7.22 (m, 2H), 7.28 (d, *J*= 6.8, 1H), 9.07 (s, 1H), ppm; <sup>13</sup>CNMR (101 MHz) δ= 14.5, 18.6, 26.8, 29.6, 32.4, 35.4, 50.7, 59.4, 103.7, 110.0, 127.1, 129.4, 131.9, 132.4, 145.4, 145.6, 150.1, 167.2, 194.3; CHN analysis (%): C: 68.2, H: 7.57, N: 4.49.

**Ethyl 2,7,7-trimethyl-4-(4-nitrophenyl)-5-oxo-1,4,5,6,7,8-hexahydroquinoline-3-carboxylate (1c, Fig. S7- Fig. S9):** m.p.= 239-242 °C., FT-IR (KBr, cm<sup>-1</sup>): 3293, 3215, 3082, 2958, 1699, 1619, 1528, 1487, 1379, 1221, 1068, 698 cm<sup>-1</sup>, <sup>1</sup>H NMR (400 MHz, CDCl<sub>3</sub>) δ= 0.920 (s, 3H, CH<sub>3</sub>), 1.092 (s, 3H, CH<sub>3</sub>), 1.199 (t, 3H, *J*=7.3 Hz, CH<sub>3</sub>), 2.15 (dd, 2H, CH<sub>2</sub>), 2.26 (dd, 2H, CH<sub>2</sub>), 2.40 (s, 6H, 2×CH<sub>3</sub>), 4.07 (q, 2H, *J*=7.4 Hz, OCH<sub>2</sub>), 5.17 (s, 1H, CH), 6.71 (s, 1H, NH), 7.51 (d, 2H, *J*=9.4 Hz, ArH), 8.09 (d, 2H, *J*=9.4 Hz, ArH) ppm; <sup>13</sup>CNMR (101 MHz) δ= 14.5, 18.8, 26.9, 29.4, 32.6, 37.1, 50.5, 59.7, 102.8, 109.5, 123.6, 129.2, 146.1, 150.5, 155.4, 166.8, 194.7; CHN analysis (%): C: 66.22, H: 7.19, N: 8.38.

**Ethyl 2,7,7-trimethyl-4-(2-nitrophenyl)-5-oxo-1,4,5,6,7,8-hexahydroquinoline-3-carboxylate (1d, Fig. S10- Fig. S12):** m.p.= 202-205 °C., FT-IR (KBr, cm<sup>-1</sup>): 3293, 3082, 2958, 1699, 1619, 1487, 1379, 1221, 1608 cm<sup>-1</sup>, <sup>1</sup>H-NMR (500 MHz, CDCl<sub>3</sub>) δ= 0.86 (s, 3H), 0.96 (s, 3H), 1.02 (t, *J*= 7 Hz, 3H), 2.04 (m, 4H), 2.28 (s, 3H), 3.95 (q, *J*= 7 Hz, 2H), 5.90 (s, 1H), 7.21-7.72 (m, 5H) ppm; <sup>13</sup>CNMR (101 MHz) δ= 14.0, 19.0, 27.1, 29.1, 30.0, 31.9, 40.5, 50.6, 59.9, 104.9, 111.1, 123.9, 126.6, 131.4, 132.6, 1414.9, 145.2, 148.3, 150.1, 167.3, 195.7; CHN analysis (%): C: 66.35, H: 7.36, N: 8.45.

**Ethyl 4-(4-methoxyphenyl)-2,7,7-trimethyl-5-oxo-1,4,5,6,7,8-hexahydroquinoline-3-carboxylate (1e, Fig. S13- Fig. S15):** m.p.= 254-257 °C., FT-IR (KBr, cm<sup>-1</sup>): 3278, 3201, 3077, 2959, 1702, 1604, 1498, 1379, 1272, 1223, 1108, 1071, 1030, 841, 760 cm<sup>-1</sup>, <sup>1</sup>H NMR (400 MHz, CDCl<sub>3</sub>) δ= 0.95 (s, 3H, CH<sub>3</sub>), 1.07

(s, 3H, CH<sub>3</sub>), 1.23 (t, 3H,  $J=7.4$  Hz, CH<sub>3</sub>), 2.17-2.26 (m, 4H, 2×CH<sub>2</sub>), 2.36 (s, 3H, CH<sub>3</sub>), 3.74 (s, 3H, CH<sub>3</sub>), 4.08 (q, 2H,  $J=7.4$  Hz, OCH<sub>2</sub>), 5.17 (s, 1H, CH), 6.74-6.76 (d, 2H,  $J=8.8$  Hz, ArH), 7.23 (d, 2H,  $J=8.8$  Hz, ArH), 7.29 (s, 1H, NH) ppm; <sup>13</sup>C NMR (101 MHz)  $\delta=14.6, 18.7, 26.9, 29.6, 32.5, 35.4, 50.7, 55.3, 59.4, 104.4, 110.6, 113.5, 128.8, 140.5, 145.0, 149.6, 157.7, 167.4, d 194.7$ ; CHN analysis (%): C: 71.31, H: 8.58, N: 4.15.

**Ethyl 4-(2-methoxyphenyl)-2,7,7-trimethyl-5-oxo-1,4,5,6,7,8-hexahydroquinoline-3-carboxylate (1f, Fig. S16- Fig. S18):** m.p.= 252-255 °C., FT-IR (KBr, cm<sup>-1</sup>): 3286, 2957, 1690, 1614, 1485, 1378, 1220 cm<sup>-1</sup>, <sup>1</sup>H NMR (300 MHz, DMSO-d<sub>6</sub>)  $\delta= 0.80$  (s, 3H, CH<sub>3</sub>), 0.90-1.10 (m, 6H), 1.91 (d,  $J= 16.4$  Hz, 1H), 1.97-2.14 (m, 1H), 2.15-2.26 (m whit s at 2.18, 4H), 2.32 (d,  $J=17.0$ , 1H), 3.65 (s, 3H), 3.87 (q,  $J= 7$  Hz, 2H), 5.06 (s, 1H), 6.56-6.79 (m, 2H), 6.93 (t,  $J= 7.4$  Hz, 1H), 7.15 (d,  $J= 7$ Hz, 1H) ppm; <sup>13</sup>C NMR (101 MHz)  $\delta= 14.1, 18.0, 26.2, 29.3, 32.0, 32.8, 50.4, 55.1, 58.7, 102.9, 108.6, 111.0, 119.4, 126.9, 130.5, 134.9, 144.1, 149.9, 157.1, 167.3, 193.8$ ; CHN analysis (%): C: 71.46, H: 8.66, N: 4.65.

**Ethyl 4-(4-hydroxyphenyl)-2,7,7-trimethyl-5-oxo-1,4,5,6,7,8-hexahydroquinoline-3-carboxylate (1g, Fig S19 and Fig S20):** m.p.=218-220 °C., FT-IR (KBr, cm<sup>-1</sup>): 3445, 3277, 2958, 1668, 1607, 1484, 1278, 1222, 1075, 843, 603 cm<sup>-1</sup>, <sup>1</sup>H NMR (400 MHz, DMSO-d<sub>6</sub>)  $\delta= 0.87$  (s,3H) 1.00 (s, 3H), 1.14 (t,  $J= 7.1$ , 3H), 1.99 (d,  $J= 16.1$ , 1H), 2.16 (d,  $J= 16.1$ , 1H), 2.32–2.25 (m with s at 2.27, 4H), 2.40 (d,  $J= 17.0$ , 1H), 3.98 (q,  $J= 7.0$ , 2H), 4.78 (s, 1H), 6.45 (d,  $J= 7.3$ , 1H), 6.59–6.56 (m, 2H), 6.94 (t,  $J= 7.7$ , 1H), 9.00 (s, 1H), 9.05 (s, 1H) ppm; CHN analysis (%): C: 72.76, H: 8.39, N: 5.01.

**Ethyl 2,7,7-trimethyl-5-oxo-4-(p-tolyl)-1,4,5,6,7,8-hexahydroquinoline-3-carboxylate (1h, Fig. S21- Fig. S23):** m.p.= 263-266 °C., FT-IR (KBr, cm<sup>-1</sup>): 3278, 2962, 1701, 1605, 1492, 1370, 1213, 1071, 1028, 841, 748, 533 cm<sup>-1</sup>, <sup>1</sup>H NMR (400 MHz, DMSO-d<sub>6</sub>)  $\delta= 0.83$  (s, 3H), 0.99 (s, 3H) 1.12 (s, 3H), 1.95 (d,  $J=16$ , 1H), 2.10-2.36 (m whit 2s at 2.18 and 2.25, 8H), 2.39 (d,  $J=17.1$  Hz, 1H), 3.95 (m, 2H), 4.79 (s, 1H), 6.90-7.15 (m, 4H), 8.99 (s, 1H, NH) ppm; <sup>13</sup>C NMR (101 MHz)  $\delta=, 14.6, 18.7, 21.0, 26.9, 29.6, 32.6, 35.8, 50.7, 59.4, 104.2, 110.5, 127.8, 128.7, 135.0, 145.2, 149.8, 167.3, 194.7$ ; CHN analysis (%): C: 75.25, H: 8.82, N: 4.99.

**Ethyl-4-(4-bromophenyl)-2,7,7-trimethyl-5-oxo-1,4,5,6,7,8-hexahydroquinoline-3-carboxylate (1i, Fig. S24 and Fig. S25):** m.p.= 258-261 °C., FT-IR (KBr, cm<sup>-1</sup>): 3277, 3199, 3076, 2966, 1703, 1603, 1490, 1378, 1277, 1217, 1069, 842, 737, 529 cm<sup>-1</sup>, <sup>1</sup>H NMR (400 MHz, CDCl<sub>3</sub>)  $\delta= 0.953$  (s, 3H,CH<sub>3</sub>), 1.099 (s, 3H, CH<sub>3</sub>), 1.219 (t,  $J=7.2$  Hz, 3H, CH<sub>3</sub>), 2.152-2.399 (m, 7H, 2×CH<sub>2</sub>, CH<sub>3</sub>), 4.08 (q,  $J= 7.2$  Hz, 2H, OCH<sub>2</sub>), 5.037 (s, 1H, CH), 6.01 (br, 1H, NH), 7.21 (d,  $J= 8.3$  Hz, 2H, ArH), 7.34 (d,  $J= 8.5$  Hz, 2H, ArH), 8.23 (s, 1H, NH) ppm; CHN analysis (%): C: 62.02, H: 6.27, N: 4.46.

**Ethyl-4-(2,4-dichlorophenyl)-2,7,7-trimethyl-5-oxo-1,4,5,6,7,8-hexahydroquinoline-3-carboxylate:**

**(1j, Fig. S26-Fig. S28):** m.p.= 240–243 °C., FT-IR (KBr, cm<sup>-1</sup>): 3277, 3203, 3078, 2951, 1694, 1607, 1490 cm<sup>-1</sup>, <sup>1</sup>H NMR (400 MHz, DMSO-d<sub>6</sub>) δ= 0.83 (s, 3H), 0.99 (s, 3H), 1.07 (t, *J*= 6.8, 3H), 1.91 (d, *J*= 16.0, 1H), 2.13 (d, *J*= 16.1, 1H), 2.30-2.20 (m with s at 2.24, 4H), 2.41 (d, *J*= 17.1, 1H), 3.93 (m, 2H), 5.14 (s, 1H), 7.27 (s, 2H), 7.33 (s, 1H), 9.11 (s, 1H) ppm; <sup>13</sup>CNMR (101 MHz) δ= 18.7, 26.8, 29.5, 32.4, 35.2, 50.6, 59.5, 103.2, 109.7, 127.3, 128.6, 131.2, 133.2, 133.3, 144.7, 14.5, 145.9, 150.3, 167.0, 194.3; CHN analysis (%): C: 60.46, H: 6.37, N: 4.22.

**Ethyl-4-(4-hydroxy-3-methoxyphenyl)-2,7,7-trimethyl-5-oxo-1,4,5,6,7,8-hexahydroquinoline-3-**

**carboxylate (1k, Fig. S29 and Fig. S30):** m.p.= 217-220 °C., FT-IR (KBr, cm<sup>-1</sup>): 3390, 2955, 1700, 1645, 1590, 1480, 1385, 1220, 1030, 782 cm<sup>-1</sup>, <sup>1</sup>H NMR (400 MHz, DMSO-d<sub>6</sub>) δ= 1.01 (s, 3H, CH<sub>3</sub>), 1.05 (s, 3H, CH<sub>3</sub>), 1.18 (t, 3H, *J*= 7.2 Hz, CH<sub>3</sub>), 1.96 (s, 2H, CH<sub>2</sub>), 2.15 (s, 2H, CH<sub>2</sub>), 2.26 (s, 3H, CH<sub>3</sub>), 3.67 (s, 3H, OCH<sub>3</sub>), 4.01 (q, 2H, *J*= 7.6 Hz, OCH<sub>2</sub>), 4.75 (s, 1H, CH), 6.49 (s, 1H, OH), 6.52 (d, 2H, *J*= 2 Hz, ArH), 6.58 (s, 1H, ArH), 6.70 (d, 2H, *J*= 2 Hz, ArH), 8.99 (s, 1H, NH) ppm; CHN analysis (%): C: 69.31, H: 8.11, N: 4.55.

**Diethyl 4,4'-(1,3-phenylene)bis(2,7,7-trimethyl-5-oxo-1,4,5,6,7,8-hexahydroquinoline-3-carboxylate)**

**(1l, Fig. S31- Fig. S35):** m.p.= >300 °C., FT-IR (KBr, cm<sup>-1</sup>): 3295, 3214, 3079, 2959, 1692, 1614, 1489, 1379, 1218 cm<sup>-1</sup>, <sup>1</sup>H NMR (400 MHz, DMSO-d<sub>6</sub>) δ= 0.80 (s, 3H, CH<sub>3</sub>), 0.84 (s, 3H, CH<sub>3</sub>), 1.006 (s, 3H, CH<sub>3</sub>), 1.015 (s, 3H, CH<sub>3</sub>), 1.07 (t, *J*=7.2 Hz, 3H, CH<sub>3</sub>), 1.17 (t, *J*=7.2 Hz, 3H, CH<sub>3</sub>), 1.90-1.99 (m, 2H), 2.13-2.20 (m, 2H), 2.26-2.31 (8H, 2CH<sub>3</sub> and CH<sub>2</sub>), 2.36-2.44 (m, 2H, CH<sub>2</sub>), 3.9-4.1 (m, 4H, 2×CH<sub>2</sub>), 4.77 (s, 1H, CH), 4.83 (s, 1H, CH), 6.81-7 (m, 3H, ArH), 7 (s, 1H, ArH), 9.00 (s, 1H, NH), 9.03 (s, 1H, NH) ppm; CHN analysis (%): C: 72.87, H: 8.85, N: 5.05.

**Methyl-4-(4-chlorophenyl)-2,7,7-trimethyl-5-oxo-1,4,5,6,7,8-hexahydroquinoline-3-carboxylate (1m,**

**Fig. S36- Fig. S38):** m.p.= 256-258 °C., FT-IR (KBr, cm<sup>-1</sup>): 3287, 3201, 3076, 2958, 1685, 1605, 1409, 1383, 1335, 1227, 1008, 841 cm<sup>-1</sup>, <sup>1</sup>H NMR (400 MHz, DMSO-d<sub>6</sub>) δ= 0.948 (s, 3H, CH<sub>3</sub>), 1.102 (s, 3H, CH<sub>3</sub>), 2.243-2.412 (m, 3H, CH<sub>3</sub>), 3.636 (s, 3H, CH<sub>3</sub>), 5.062 (s, 1H, CH), 6.06 (br, 1H, NH), 7.18 (d, *J*= 8.6 Hz, 2H, ArH), 7.28 (d, *J*= 8.4 Hz, 2H, ArH) ppm; <sup>13</sup>CNMR (101 MHz) δ= 18.8, 26.8, 29.532.6, 35.8, 50.6, 51.1103.2, 110.1, 128.2, 129.6, 130.7, 146.1, 146.8, 150.0, 167.6, 194.7; CHN analysis (%): C: 65.88, H: 7.02, N: 4.20.

**Methyl 2,7,7-trimethyl-5-oxo-4-(p-tolyl)-1,4,5,6,7,8-hexahydroquinoline-3-carboxylate (1n, Fig S39-**

**Fig. S41):** m.p.=272-274 °C., FT-IR (KBr, cm<sup>-1</sup>): 3281, 3191, 3069, 2957, 1688, 1603, 1492, 1382, 1226, 1112, 779 cm<sup>-1</sup>, <sup>1</sup>H NMR (300 MHz, EtOH-d<sub>6</sub>) δ= 0.80 (s, 3H, CH<sub>3</sub>), 0.96 (s, 3H, CH<sub>3</sub>), 1.90-2.15 (m with

s at 2.11, 5H), 2.19-2.27 (m with s at 2.25, 4H), 2.23 (d,  $J=16.7$  Hz, 1H), 3.47 (s, 3H), 4.48 (s, 1H), 6.83 (d,  $J=7.6$  Hz, 2H), 7.01 (d,  $J=7.8$  Hz, 2H) ppm;  $^{13}\text{C}$ NMR (101 MHz)  $\delta=18.7, 21.0, 26.9, 29.6, 32.5, 35.6, 50.7, 51.0, 103.8, 110.5, 127.6, 128.8, 135.0, 145.0, 145.5, 149.7, 167.8, 194.7$ ; CHN analysis (%): C: 73.99, H: 8.13, N: 5.22.

**Methyl 4-(4-methoxyphenyl)-2,7,7-trimethyl-5-oxo-1,4,5,6,7,8-hexahydroquinoline-3-carboxylate (1o, Fig S42- Fig. S44):** m.p.=254-257 °C., FT-IR (KBr,  $\text{cm}^{-1}$ ): 3271, 3192, 3078, 2968, 1698, 1608, 1493, 1378, 1280, 1212, 842  $\text{cm}^{-1}$ ,  $^1\text{H}$  NMR (300 MHz, EtOH- $d_6$ ):  $\delta=0.80$  (s, 3H,  $\text{CH}_3$ ), 0.96 (s, 3H,  $\text{CH}_3$ ), 1.97 (d,  $J=16.5$  Hz, 1H), 2.12 (d,  $J=16.5$  Hz, 1H), 2.16-2.28 (m with s at 2.25, 4H), 2.33 (d,  $J=17$  Hz, 1H), 3.46 (s, 3H), 3.59 (s, 3H), 4.82 (s, 1H), 6.58 (d,  $J=8.1$  Hz, 2H), 7.03 (d,  $J=8.1$  Hz, 2H) ppm;  $^{13}\text{C}$ NMR (101 MHz)  $\delta=18.7, 26.9, 29.6, 32.6, 35.2, 50.7, 51.1, 55.3, 104.0, 110.7, 113.6, 128.6, 140.3, 145.4, 149.6, 157.7, 167.8, 194.7$ ; CHN analysis (%): C: 71.22, H: 6.35, N: 4.14.

**Methyl-4-(4-hydroxy-3-methoxyphenyl)-2,7,7-trimethyl-5-oxo-1,4,5,6,7,8-hexahydroquinoline-3-carboxylate (1p, Fig S45- Fig. S47)** m.p.= 260-263 °C., FT-IR (KBr): 3372, 3292, 3243, 3069, 2956, 1702  $\text{cm}^{-1}$ ,  $^1\text{H}$  NMR (400 MHz, DMSO- $d_6$ )  $\delta=0.88$  (s, 3H,  $\text{CH}_3$ ), 1.01 (s, 3H,  $\text{CH}_3$ ), 2.01 (d, 1H,  $J=7.8$  Hz,  $\text{CH}_2$ ), 2.20 (d, 1H,  $J=8.0$  Hz,  $\text{CH}_2$ ), 2.26 (s, 3H,  $\text{CH}_3$ ), 2.30 (d, 1H,  $J=6.4$  Hz,  $\text{CH}_2$ ), 2.44 (d, 1H,  $J=8.4$  Hz,  $\text{CH}_2$ ), 3.55 (s, 3H,  $\text{CH}_3$ ), 3.66 (s, 3H,  $\text{CH}_3$ ), 4.76 (s, 1H, CH), 6.50 (d, 1H,  $J=2.0$  Hz, ArH), 6.58 (s, 1H, ArH), 6.70 (d, 1H,  $J=1.6$  Hz, ArH), 8.63 (s, 1H, OH), 9.03 (s, 1H, NH) ppm;  $^{13}\text{C}$  NMR (100 MHz, DMSO- $d_6$ )  $\delta=18.7, 26.8, 32.6, 35.2, 51.1, 55.9, 112.2, 115.4, 119.7, 127.3, 129.0, 139.3, 145.0, 145.2, 145.9, 147.3, 149.7, 168.0, 184.7, 194.9$ ; CHN analysis (%): C: 68.34, H: 7.15, N: 4.12.

**Ethyl 4-(4-chlorophenyl)-2-methyl-5-oxo-1,4,5,6,7,8-hexahydroquinoline-3-carboxylate (1q, Fig. S48 and Fig. S49):** m.p.= 233-236 °C., FT-IR (KBr,  $\text{cm}^{-1}$ ): 3278, 3199, 3077, 2967, 1705, 1603, 1491, 1379, 1278, 1216, 1154, 1076, 843, 739  $\text{cm}^{-1}$ ,  $^1\text{H}$  NMR (400 MHz,  $\text{CDCl}_3$ )  $\delta=1.20$  (t,  $J=7.2$  Hz, 3H,  $\text{CH}_3$ ), 1.644 (s, 1H), 1.944-2.053 (m, 2H,  $\text{CH}_2$ ), 2.33-2.48 (m, 7H), 4.08 (q,  $J=7.2$  Hz, 2H,  $\text{CH}_2$ ), 5.08 (s, 1H, CH), 6.01 (br, 1H, NH), 7.19 (d,  $J=8$  Hz, 2H, ArH), 7.24 (d,  $J=8$  Hz, 2H, ArH) ppm; CHN analysis (%): C: 66.54, H: 6.12, N: 5.15.

**Ethyl 4-(4-methoxyphenyl)-2-methyl-5-oxo-1,4,5,6,7,8-hexahydroquinoline-3-carboxylate (1r, Fig. S50 and Fig. S51)** m.p.= 189-192 °C., FT-IR (KBr): 3295, 2970, 1695, 1604, 1480, 1378, 1220, 1179  $\text{cm}^{-1}$ ,  $^1\text{H}$  NMR (400 MHz,  $\text{CDCl}_3$ )  $\delta=1.24$  (t,  $J=7.2$  Hz), 1.91 2.02 (m, 2H), 2.29 2.42 (m, 7H), 3.75 (s, 3H), 4.08 (q,  $J=7.2$  Hz, 2H), 5.06 (s, 1H), 6.74 6.78 (m, 3H), 7.24 (d,  $J=8.8$  Hz, 2H, Ar H) ppm; CHN analysis (%): C: 71.24, H: 7.12, N: 5.30.

**Ethyl 4-(4-nitrophenyl)-2-methyl-5-oxo-1,4,5,6,7,8-hexahydroquinoline-3-carboxylate (1s)** m.p.= 212-215 °C., FT-IR (KBr,  $\text{cm}^{-1}$ ): 3270, 3190, 2970, 1725, 1600, 1450, 1300, 1270, 843, 740  $\text{cm}^{-1}$ ,  $^1\text{H}$  NMR (400 MHz,  $\text{CDCl}_3$ ) =  $\delta$  1.18 (t, 3H,  $J$ = 6.8 Hz), 1.80-2.10 (m, 2H), 2.30-2.60 (m, 7H), 4.03-4.09 (m, 2H), 5.18 (s, 1H), 7.30 (s, 1H), 7.48 (d, 2H,  $J$ = 7.6 Hz), 8.10 (d, 2H,  $J$ =7.6 Hz) ppm; CHN analysis (%): C: 63.99, H: 6.12, N: 8.68.

**Ethyl 2-methyl-5-oxo-4-(p-tolyl)-1,4,5,6,7,8-hexahydroquinoline-3-carboxylate (1t, Fig S52 and Fig. S53):** m.p.= 245-247 °C., FT-IR (KBr,  $\text{cm}^{-1}$ ): 3275, 3187, 3068, 2963, 1705, 1606, 1498, 1381, 1213, 1025, 843  $\text{cm}^{-1}$ ,  $^1\text{H}$  NMR (400 MHz,  $\text{CDCl}_3$ ):  $\delta$ = 1.24 (t,  $J$  = 7.2 Hz, 3H,  $\text{CH}_3$ ), 1.91-2.02 (m, 2H,  $\text{CH}_2$ ), 2.29-2.42 (m, 7H), 3.75 (s, 3H,  $\text{CH}_3$ ), 4.08 (q,  $J$  = 7.2 Hz, 2H,  $\text{CH}_2$ ), 5.06 (s, 1H, CH), 6.74-6.78 (m, 3H), 7.24 (d,  $J$  = 8.8 Hz, 2H, ArH) ppm; CHN analysis (%): C: 75.06, H: 8.18, N: 5.25.

**Ethyl 4-(4-hydroxy-3-methoxyphenyl)-2-methyl-5-oxo-1,4,5,6,7,8-hexahydroquinoline-3-carboxylate (1u)** m.p.= 222-225 °C., FT-IR (KBr,  $\text{cm}^{-1}$ ): 3392, 3297, 2997, 1672, 1605, 1478, 1377, 1286, 1224, 1183, 1161, 1124, 1078, 726, 686  $\text{cm}^{-1}$ ,  $^1\text{H}$  NMR (300 MHz,  $\text{DMSO-d}_6$ )  $\delta$ = 1.16 (t, 3H,  $J$ = 8.1 Hz,  $\text{OCH}_2\text{CH}_3$ ), 1.62-2.29 (m, 6H,  $3\times\text{CH}_2$ ), 2.48 (s, 3H,  $\text{CH}_3$ ), 3.68 (s, 3H,  $\text{OCH}_3$ ), 4.00 (q,  $J$ = 8.1 Hz, 2H,  $\text{OCH}_2\text{CH}_3$ ) 4.80 (s, 1H, H4), 6.48 (d,  $J$ = 8.1 Hz, 1H, Ar-H), 6.58 (d,  $J$ = 8.1 Hz, 1H, Ar-H), 6.71 (s, 1H, Ar-H), 8.63 (s, 1H, OH), 9.07 (s, 1H, NH) ppm; CHN analysis (%): C: 69.12, H: 7.54, N: 4.36.

**Ethyl (E)-2-methyl-4-(2-nitrostyryl)-5-oxo-1,4,5,6,7,8-hexahydroquinoline-3-carboxylate (1v, Fig S54 and Fig. S55)** m.p.= 206-208 °C., FT-IR(KBr,  $\text{cm}^{-1}$ ): 3,290, 3,071, 2,955, 1,724, 1,695, 1,608, 1,520, 1,472, 1,379, 1,136, 745  $\text{cm}^{-1}$ ,  $^1\text{H}$  NMR (400, MHz  $\text{DMSO-d}_6$ )  $\delta$ = 1.21 (t,  $J$ =7.2 Hz, 3H), 1.92 (m, 2H), 2.26-2.27 (m, 5H,  $\text{CH}_2$  and  $\text{CH}_3$ ), 2.45-2.487 (m, 2H), 4.05-4.14 (m, 2H), 4.54 (d,  $J$ =8Hz, 1H), 6.198 (dd,  $J_1$ =16,  $J_2$ = 4Hz, 1H), 6.39 (d,  $J$ =16 Hz, 1H), 7.42 (td,  $J_1$ = 7.6 Hz,  $J_2$ = 1.2 Hz, 1H), 7.59 (t,  $J_1$ = 7.4 Hz, 1H), 7.67 (dd,  $J_1$ =8Hz,  $J_2$ =1.2 Hz, 1H), 7.86 (dd,  $J_1$ = 8Hz,  $J_2$ = 1.2 Hz, 1H), 9.22 (1H, NH) ppm; CHN analysis (%): C: 67.08, H: 6.20, N: 8.12.

**9-(4-chlorophenyl)-3,3,6,6-tetramethyl-3,4,6,7,9,10-hexahydroacridine-1,8(2H,5H)-dione (2a, Fig S56 and Fig. S57):** m.p. = >300 °C., FT-IR (KBr,  $\text{cm}^{-1}$ ): 3174, 3065, 2954, 1651, 1609, 1493, 1365, 1221, 1148, 841  $\text{cm}^{-1}$ ,  $^1\text{H}$  NMR (400 MHz,  $\text{CDCl}_3$ )  $\delta$ = 0.99 (s, 6H,  $2\text{CH}_3$ ), 1.11 (s, 6H,  $2\text{CH}_3$ ), 2.18 (d,  $J$ = 16.4 Hz, 2H,  $\text{CH}_2$ ), 2.24 (d,  $J$ = 16.4 Hz, 2H,  $\text{CH}_2$ ), 2.28 (d,  $J$ = 16.4 Hz, 2H,  $\text{CH}_2$ ), 2.35 (d,  $J$ = 16.4 Hz, 2H,  $\text{CH}_2$ ), 5.08 (s, 1H, CH), 7.15 (br., 1H, NH), 7.19 (d,  $J$ = 8.4 Hz, 2H, Ar-H), 7.31 (d,  $J$ = 8.4 Hz, 2H, Ar-H) ppm; CHN analysis (%): C: 72.69, H: 7.38, N: 4.41.

**3,3,6,6-tetramethyl-9-(4-nitrophenyl)- 3,4,6,7,9,10-hexahydroacridine-1,8(2H,5H)-dione (2b, Fig S58 and Fig. S59)** m.p.= >300 °C., FT-IR (KBr,  $\text{cm}^{-1}$ ): 3277, 3199, 3076, 2966, 1703, 1603, 1490, 1378, 1277,

1217  $\text{cm}^{-1}$ ,  $^1\text{H}$  NMR (500 MHz,  $\text{CDCl}_3$ )  $\delta$ = 1.00 (s, 6H, 2 $\text{CH}_3$ ), 1.14 (s, 6H, 2 $\text{CH}_3$ ), 2.19 (d,  $J$ = 16.2 Hz, 2H,  $\text{CH}_2$ ), 2.28 (d,  $J$ = 16.2 Hz, 2H,  $\text{CH}_2$ ), 2.32 (d,  $J$ = 16.8 Hz, 2H,  $\text{CH}_2$ ), 2.46 (d,  $J$ = 16.8 Hz, 2H,  $\text{CH}_2$ ), 5.19 (s, 1H, CH), 6.12 (s br., 1H, NH), 7.54 (d,  $J$ = 8.7 Hz, 2H, Ar-H), 8.11 (d,  $J$ = 8.74 Hz, 2H, Ar-H) ppm; CHN analysis (%): C: 71.88, H: 7.42, N: 6.53.

**3,3,6,6-tetramethyl-9-(3-nitrophenyl)-3,4,6,7,9,10-hexahydroacridine-1,8(2H,5H)-dione (2c, Fig S60 and Fig. S61):** m.p.= 297-300  $^\circ\text{C}$ ., FT-IR (KBr,  $\text{cm}^{-1}$ ): 3271, 3182, 3063, 2959, 1649, 1608, 1528, 1487, 1366, 1223, 1143, 691  $\text{cm}^{-1}$ .,  $^1\text{H}$  NMR (400 MHz,  $\text{CDCl}_3$ )  $\delta$ = 1.00 (s, 6H, 2 $\text{CH}_3$ ), 1.13 (s, 6H, 2 $\text{CH}_3$ ), 2.19 (d,  $J$ = 16.4 Hz, 2H,  $\text{CH}_2$ ), 2.28 (d,  $J$ = 16.4 Hz, 2H,  $\text{CH}_2$ ), 2.34 (d,  $J$ = 16.8 Hz, 2H,  $\text{CH}_2$ ), 2.45 (d,  $J$ = 16.8 Hz, 2H,  $\text{CH}_2$ ), 5.20 (s, 1H, CH), 6.20 (s, 1H, NH), 7.41 (t,  $J$ = 8.0 Hz, 1H, Ar-H), 7.91 (dt,  $J$ = 7.6, 1.6 Hz, 1H, Ar-H), 7.98 (ddd,  $J$ = 8.2, 2.4, 0.8 Hz, 1H, Ar-H), 8.07 (t,  $J$ = 2.0 Hz, 1H, Ar-H) ppm; CHN analysis (%): C: 72.30, H: 7.46, N: 8.05.

**9-(4-methoxyphenyl)-3,3,6,6-tetramethyl-3,4,6,7,9,10-hexahydroacridine-1,8(2H,5H)-dione (2d, Fig S62 and Fig. S63):** m.p.= >300  $^\circ\text{C}$ ., FT-IR (KBr,  $\text{cm}^{-1}$ ): 3276, 3206, 3070, 2957, 1645, 1606, 1482, 1365, 1223, 1143, 833  $\text{cm}^{-1}$ .,  $^1\text{H}$  NMR (300 MHz,  $\text{DMSO-d}_6$ ) 0.85 (s, 6H, 2 $\text{CH}_3$ ), 0.99 (s, 6H, 2 $\text{CH}_3$ ), 1.96 (d,  $J$ = 16.1 Hz, 2H,  $\text{CH}_2$ ), 2.15 (d,  $J$ = 16.1 Hz, 2H,  $\text{CH}_2$ ), 2.29 (d,  $J$ = 17.0 Hz, 2H,  $\text{CH}_2$ ), 2.43 (d,  $J$ = 17.0 Hz, 2H,  $\text{CH}_2$ ), 3.64 (s, 3H,  $\text{OCH}_3$ ), 4.74 (s, 1H, CH), 6.70 (d,  $J$ = 8.6 Hz, 2H, Ar-H), 7.04 (d,  $J$ = 8.6 Hz, 2H, Ar-H), 9.23 (s br., 1H, NH) ppm; CHN analysis (%): C: 76.69, H: 8.25, N: 4.45.

**9-(2-methoxyphenyl)-3,3,6,6-tetramethyl-3,4,6,7,9,10-hexahydroacridine-1,8(2H,5H)-dione (2e, Fig S64):** m.p.= >300 $^\circ\text{C}$ ., FT-IR (KBr,  $\text{cm}^{-1}$ ): 3281, 3168, 3046, 2955, 1638, 1604, 1489, 1367, 1224, 1143, 748  $\text{cm}^{-1}$ .,  $^1\text{H}$  NMR (250 MHz,  $\text{CDCl}_3$ )  $\delta$ = 0.92 (s, 6H, 2 $\times\text{CH}_3$ ), 1.04 (s, 6H, 2 $\times\text{CH}_3$ ), 2.04-2.11 (dd, 4H, 2 $\times\text{CH}_2$ ), 2.16-2.30 (dd, 4H, 2 $\times\text{CH}_2$ ), 3.80 (s, 3H,  $\text{CH}_3$ ), 5.24 (s, 1H, CH), 6.76-7.0 (m, 4H, ArH), 7.29 (s, 1H, NH) ppm; CHN analysis (%): C: 76.15, H: 8.68, N: 4.36.

**9-(4-hydroxyphenyl)-3,3,6,6-tetramethyl-3,4,6,7,9,10-hexahydroacridine-1,8(2H,5H)-dione (2f, Fig S65 and Fig. S66):** m.p. = >300  $^\circ\text{C}$ ., FT-IR (KBr,  $\text{cm}^{-1}$ ): 3276, 3197, 2955, 1611, 1472, 1372, 1221, 1140, 838  $\text{cm}^{-1}$ .,  $^1\text{H}$  NMR (400 MHz,  $\text{DMSO-d}_6$ )  $\delta$ = 0.85 (s, 6H, 2 $\text{CH}_3$ ), 0.99 (s, 6H, 2 $\text{CH}_3$ ), 1.96 (d,  $J$ = 16.1 Hz, 2H,  $\text{CH}_2$ ), 2.14 (d,  $J$ = 16.1 Hz, 2H,  $\text{CH}_2$ ), 2.29 (d,  $J$ = 17.0 Hz, 2H,  $\text{CH}_2$ ), 2.41 (d,  $J$ = 17.0 Hz, 2H,  $\text{CH}_2$ ), 4.68 (s, 1H, CH), 6.51 (d,  $J$ = 8.4 Hz, 2H, Ar-H), 6.91 (d,  $J$ = 8.4 Hz, 2H, Ar-H), 8.99 (s br., 1H, NH or OH), 9.25 (s br., 1H, NH or OH) ppm; CHN analysis (%): C: 76.24, H: 8.49, N: 4.65.

**9-(4-hydroxy-3methoxyphenyl)-3,3,6,6-tetramethyl-3,4,6,7,9,10-hexahydroacridine-1,8(2H,5H)-dione (2g, Fig. S 67)** m.p.= 297-298  $^\circ\text{C}$ ., FT-IR (KBr): 3409, 3274, 3168, 3049, 1623, 1511, 1370  $\text{cm}^{-1}$ ,  $^1\text{H}$

NMR (400 MHz, DMSO)  $\delta$ = 0.88 (s, 6H), 1.01 (s, 6H), 2.46-1.98 (m, 8H), 3.65(s, 3H), 4.72 (s, 1H), 6.52 (s, 2H), 6.70 (s, 1H), 8.55 (s, 1H), 9.21 (s, 1H) ppm; CHN analysis (%): C: 73.78, H: 6.93, N: 4.45.

**3,3,6,6-tetramethyl-9-(p-tolyl)-3,4,6,7,9,10-hexahydroacridine-1,8(2H,5H)-dione (2h, Fig. S68 and Fig. S69)** m.p.= >300 °C., FT-IR (KBr,  $\text{cm}^{-1}$ ): 3283, 3206, 3082, 2963, 2880, 1703, 1606, 1494, 1379,  $^1\text{H}$ -NMR (400 MHz,  $\text{CDCl}_3$ )  $\delta$ = 1.09 (s, 6H, 2 $\text{CH}_3$ ), 1.25 (s, 6H, 2 $\text{CH}_3$ ), 2.19 (s, 3H,  $\text{CH}_3$ ), 2.21-2.45 (m, 8H, 4 $\text{CH}_2$ ), 5.52 (s, 1H, CH), 6.98-7.03 (m, 2H, Ar-H), 7.08-7.10 (d,  $J$ = 8 Hz, 1H, Ar-H), 7.22-7.24 (d,  $J$ = 8 Hz, 1H, Ar-H), 11.93 (s, 1H, NH) ppm; CHN analysis (%): C: 80.68, H: 7.99, N: 4.56.

**3,3,6,6-tetramethyl-9-(o-tolyl)-3,4,6,7,9,10-hexahydroacridine-1,8(2H,5H)-dione (2i, Fig S70- Fig. S72):** m.p.= >300 °C., FT-IR (KBr,  $\text{cm}^{-1}$ ): 3273, 3182, 3063, 2959, 1647, 1611, 1490, 1365, 1222, 1143, 746  $\text{cm}^{-1}$ ,  $^1\text{H}$  NMR (250 MHz,  $\text{CDCl}_3$ )  $\delta$ = 1.20 (s, 6H,  $\text{CH}_3$ ), 1.34 (s, 6H), 2.32 (s, 3H), 2.38 (d,  $J$ =16.2 Hz, 2H), 2.44 (d,  $J$ =16.2 Hz, 2H), 2.51 (d,  $J$ = 16.2 Hz, 2H), 2.60 (d,  $J$ =16.2 Hz, 2H), 3.94 (s, 1H), 7.15-7.23 (m, ,5H), 9.37 (s, 1H) ppm;  $^{13}\text{C}$  NMR (62.9 MHz,  $\text{CDCl}_3$ ):  $\delta$ : 18.3, 26.7, 29.4, 32.3, 39.3, 40.2, 40.4, 50.7, 51.4, 114.3, 125.4, 128.0, 129.4, 135.9, 146.5, 148.7, 195.6; CHN analysis (%): C: 80.32, H: 8.06, N: 4.33.

**9-phenyl-3,4,6,7,9,10-hexahydroacridine-1,8(2H,5H)-dione (2j, Fig S73 and Fig. S74):** m.p. = >300°C., FT-IR (KBr,  $\text{cm}^{-1}$ ): 3262, 3168, 3045, 2938, 2882, 1640, 1600, 1482, 1362, 1231, 1178, 1133, 957, 705  $\text{cm}^{-1}$ ,  $^1\text{H}$  NMR (400 MHz,  $\text{DMSO-}d_6$ )  $\delta$ = 1.90-2.09 (m, 4H, 2 $\times\text{CH}_2$ ), 2.26-2.28 (m, 2H,  $\text{CH}_2$ ), 2.30-2.38 (m, 2H,  $\text{CH}_2$ ), 2.51-2.64 (m, 4H, 2 $\times\text{CH}_2$ ), 4.79 (s, 1H, CH), 7.05-7.09 (t,  $J$ = 7.6, 2H, ArH), 7.11-7.12 (d,  $J$ = 8.4 Hz, 1H, ArH), 7.23-7.31 (dd,  $J$ = 8, 24.2, 2H, ArH), 9.17 (s, 1H, NH) ppm; CHN analysis (%): C: 78.37, H: 7.35, N: 5.22.

**9-(4-chlorophenyl)-3,4,6,7,9,10-hexahydroacridine-1,8(2H,5H)-dione (2k, Fig S75 and Fig. S76):** m.p.= >300°C., FT-IR (KBr,  $\text{cm}^{-1}$ ): 3269, 3202, 3057, 2931, 2880, 1642, 1596, 1472, 1362, 1229, 1176, 1133, 833  $\text{cm}^{-1}$ ,  $^1\text{H}$  NMR (400 MHz,  $\text{DMSO-}d_6$ )  $\delta$ = 1.71-1.97 (m, 4H), 2.20-2.22(m, 4H), 2.50-2.56 (m, 4H), 4.88 (s, 1H), 7.18 (dd, 4H), 9.47 (s, 1H) ppm; CHN analysis (%): C: 70.05, H: 6.17, N: 5.16.

**9-(4-bromophenyl)-3,4,6,7,9,10-hexahydroacridine-1,8(2H,5H)-dione (2l, Fig S77- Fig. S79)** m.p.= >300 °C, FT-IR (KBr,  $\text{cm}^{-1}$ ): 3340, 3244, 2958, 2927, 1647, 1627, 1549, 1450, 1367, 1227, 1171  $\text{cm}^{-1}$   $^1\text{H}$  NMR (400 MHz,  $\text{DMSO-}d_6$ ):  $\delta$  1.92-2.08 (m, 4H), 2.28-2.32 (m, 2H), 2.34-2.40 (m, 2H), 2.53-2.65 (m, 4H), 4.76 (s, 1H), 7.13-7.27 (m, 2H), 7.33-7.43 (dd,  $J$ = 30.6, 8.4 Hz, 2H), 9.38 (s, 1H) ppm;  $^{13}\text{C}$  NMR (100 MHz,  $\text{DMSO-}d_6$ )  $\delta$ = 20.10, 20.27, 27.13, 31.39, 36.76, 36.90, 112.08, 117.66, 127.83, 129.43, 146.47, 151.59, 171.19, 194.58; CHN analysis (%): C: 62.36, H: 5.08, N: 3.99.

**9-(4-methoxyphenyl)-3,4,6,7,9,10-hexahydroacridine-1,8(2H,5H)-dione (2m, Fig S80 and Fig. S81)** m.p. = >300°C., FT-IR (KBr,  $\text{cm}^{-1}$ ): 3276, 3206, 3071, 2958, 1647, 1607, 1483, 1366, 1222, 1143, 1030,



834  $\text{cm}^{-1}$ ,  $^1\text{H}$  NMR (400 MHz, DMSO- $d_6$ )  $\delta$ = 1.71-1.96 (m, 4H), 2.19-2.20 (m, 4H), 2.43-2.50 (m, 4H), 3.66 (s, 3H), 4.84 (s, 1H), 6.71 (d, 2H), 7.04 (d, 2H), 9.38 (s, 1H) ppm; CHN analysis (%): C: 75.82, H: 7.15, N: 5.11.

**9-(2-methoxyphenyl)-3,4,6,7,9,10-hexahydroacridine-1,8(2H,5H)-dione (2n, Fig S82 and Fig. S83):** m.p. =  $>300^\circ\text{C}$ ., FT-IR (KBr,  $\text{cm}^{-1}$ ): 3266, 3179, 3059, 2949, 2873, 1638, 1598, 1488, 1362  $\text{cm}^{-1}$ ,  $^1\text{H}$  NMR (400 MHz, DMSO)  $\delta$ = 1.68-1.96 (m, 4H), 2.12-2.26 (m, 7H), 2.46-2.55 (m, 4H), 4.87 (s, 1H), 6.98 (dd, 4H), 9.39 (s, 1H) ppm; CHN analysis (%): C: 75.09, H: 6.99, N: 5.68.

**9-(p-tolyl)-3,4,6,7,9,10-hexahydroacridine-1,8(2H,5H)-dione (2o, Fig S84- Fig. S86)**  $>300^\circ\text{C}$ :IR (KBr,  $\text{cm}^{-1}$ ): 3286, 3203, 3068, 2943, 2887, 1639, 1608, 1458, 1364, 1232, 1176  $\text{cm}^{-1}$ ,  $^1\text{H}$  NMR (400 MHz, DMSO- $d_6$ )  $\delta$ = 1.96-2.07 (m, 4H), 2.26 (s, 3H), 2.29-2.42 (m, 4H), 2.52-2.69 (m, 4H), 4.79 (s, 1H), 7.03-7.05 (d,  $J$ = 8 Hz, 2H), 7.12-7.21 (d,  $J$ = 7.6 Hz, 2H), 9.18 (s, 1H) ppm;  $^{13}\text{C}$  NMR (100 MHz, DMSO- $d_6$ )  $\delta$ = 20.31, 21.06, 27.15, 31.22, 36.98, 55.14, 113.52, 117.03, 128.25, 128.84, 129.33, 135.86, 146.36, 150.53, 169.57, 194.52; CHN analysis (%): C: 77.99, H: 7.05, N: 5.02.

**9-(2,4-dichlorophenyl)-3,4,6,7,9,10-hexahydroacridine-1,8(2H,5H)-dione (2p)** m.p:  $>300^\circ\text{C}$ ; IR (KBr): 3272, 3070, 2953, 1643, 1609, 1485, 1365, 1222, 1136, 1022, 857, 737, 572  $\text{cm}^{-1}$ ,  $^1\text{H}$  NMR (400 MHz, DMSO- $d_6$ )  $\delta$ = 1.77- 2.23 (m, 12H, 6 $\text{CH}_2$ ), 5.07 (s, 1H, CH), 7.21-7.30 (m, 3H, Ar), 9.50 (s, 1H, NH) ppm; CHN analysis (%): C: 64.05, H: 4.99, N: 4.28.

**9-(3-nitrophenyl)-3,4,6,7,9,10-hexahydroacridine-1,8(2H,5H)-dione (2q, Fig S87 and Fig. S88):** m.p.=  $>300^\circ\text{C}$ ., FT-IR (KBr,  $\text{cm}^{-1}$ ): 3181, 3059, 2940, 1642, 1606, 1525, 1484, 1347, 1234, 1178, 1132, 714  $\text{cm}^{-1}$ ,  $^1\text{H}$  NMR (400 MHz, DMSO)  $\delta$ = 1.69-1.97 (m, 4H), 2.20-2.21 (m, 4H), 2.51-2.58 (m, 4H), 4.91 (s, 1H), 7.03 (d, 1H), 7.09-7.19 (m, 4H), 9.42 (s, 1H) ppm; CHN analysis (%): C: 68.24, H: 6.31, N: 7.89.

**9-(4-Isopropylphenyl)-3,4,6,7,9,10-hexahydroacridine-1,8(2H,5H)-dione (2r, Fig. S89- Fig S93)** m.p.=  $>300^\circ\text{C}$ , IR (KBr,  $\text{cm}^{-1}$ ):3266, 3168, 3047, 2951, 1644, 1597, 1483, 1360, 1229, 1176  $\text{cm}^{-1}$ ,  $^1\text{H}$  NMR (DMSO- $d_6$ , 500 MHz)  $\delta$ = 1.13 (d,  $J$ =5, 6H), 1.73- 1.82 (m, 2H), 1.88-1.93 (m, 2H), 2.16-2.25 (m, 4H), 2.48-2.52 (m, 4H), 2.76 (h,  $J$ =5, 1H), 4.89 (s, 1H), 7.01 (d,  $J$ =10, 2H), 7.06 (d,  $J$ =10, 2H), 9.42 (s, 1H, NH) ppm,  $^{13}\text{C}$  NMR (DMSO- $d_6$ , 125 MHz)  $\delta$ = 21.2, 24.3, 26.8, 32.0, 33.4, 37.2, 113.0, 126.1, 127.8, 145.2, 145.6, 151.6, 196.2; CHN analysis (%): C: 77.26, H: 8.15, N: 5.29.

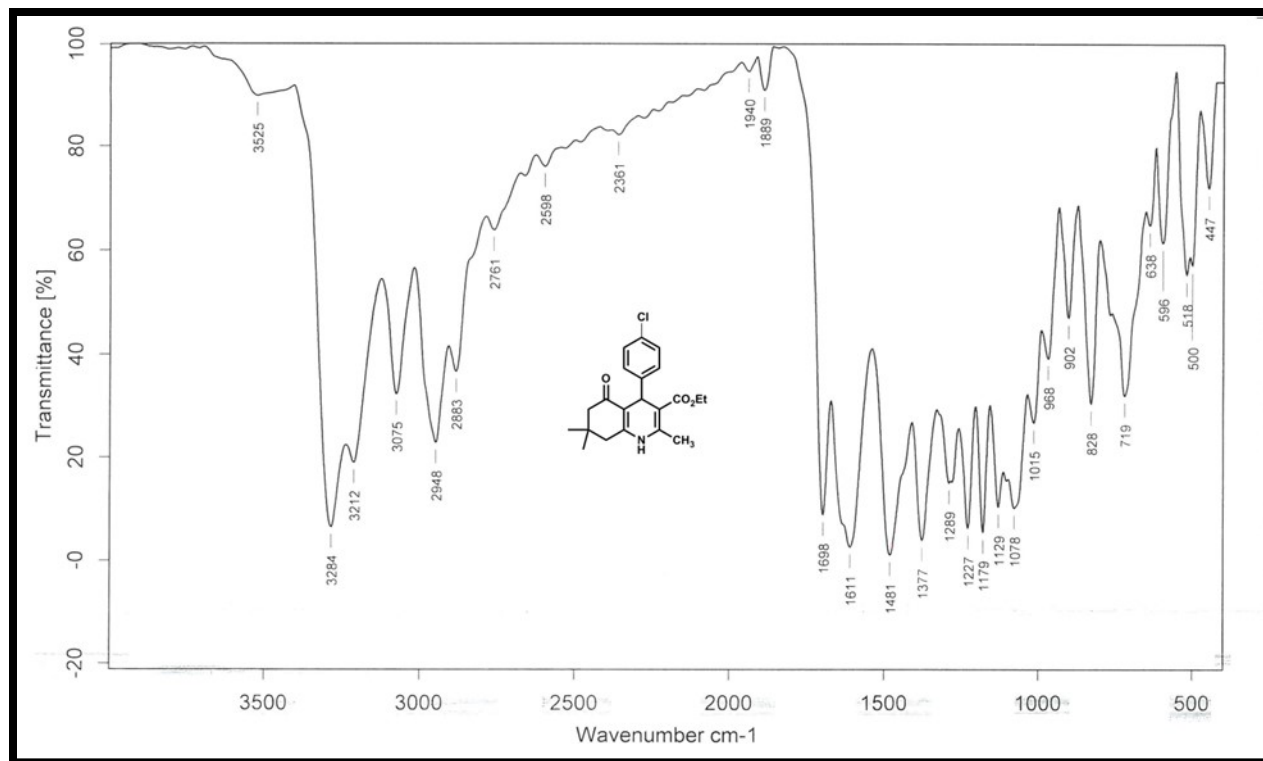

**Fig. S1.** FT-IR of ethyl 4-(4-chlorophenyl)-2,7,7-trimethyl-5-oxo-1,4,5,6,7,8-hexahydroquinoline-3-carboxylate

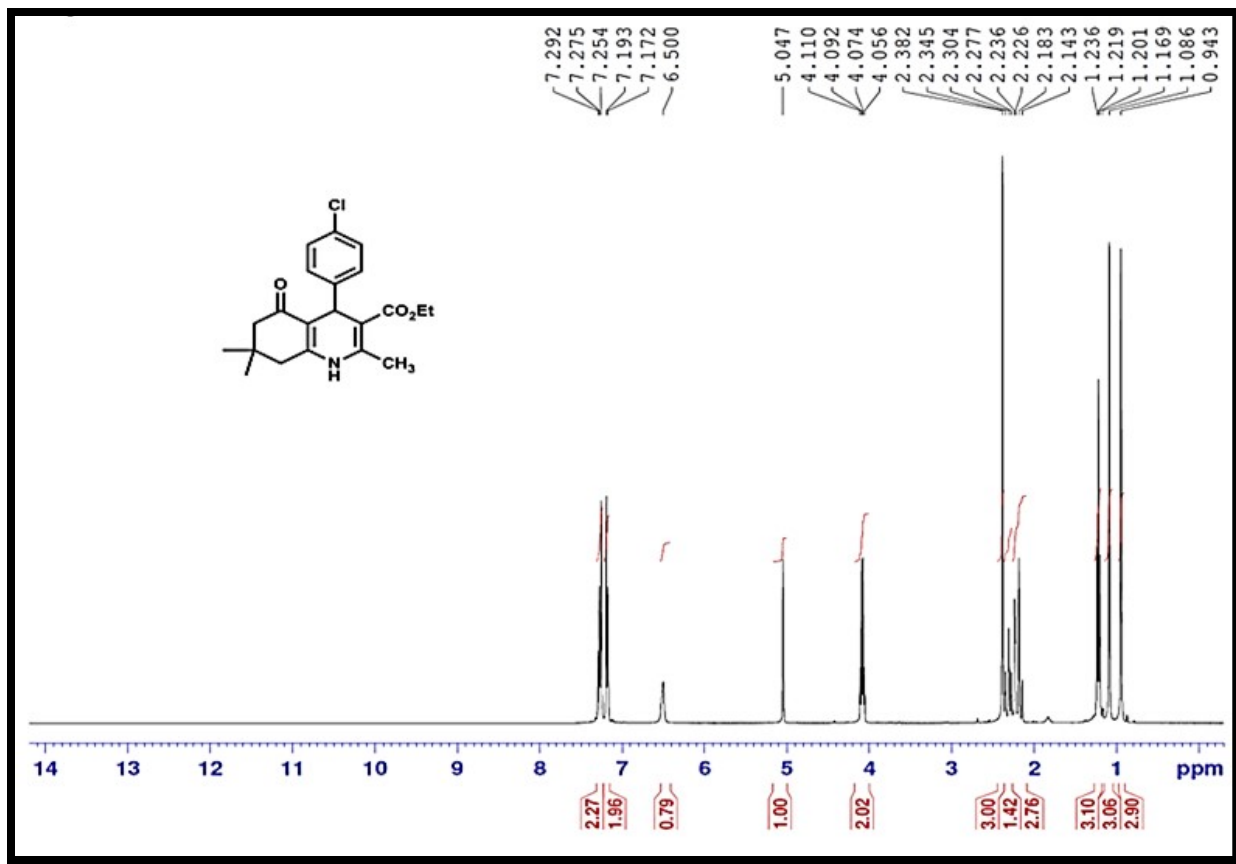

**Fig. S2.** <sup>1</sup>H NMR of ethyl 4-(4-chlorophenyl)-2,7,7-trimethyl-5-oxo-1,4,5,6,7,8-hexahydroquinoline-3-carboxylate

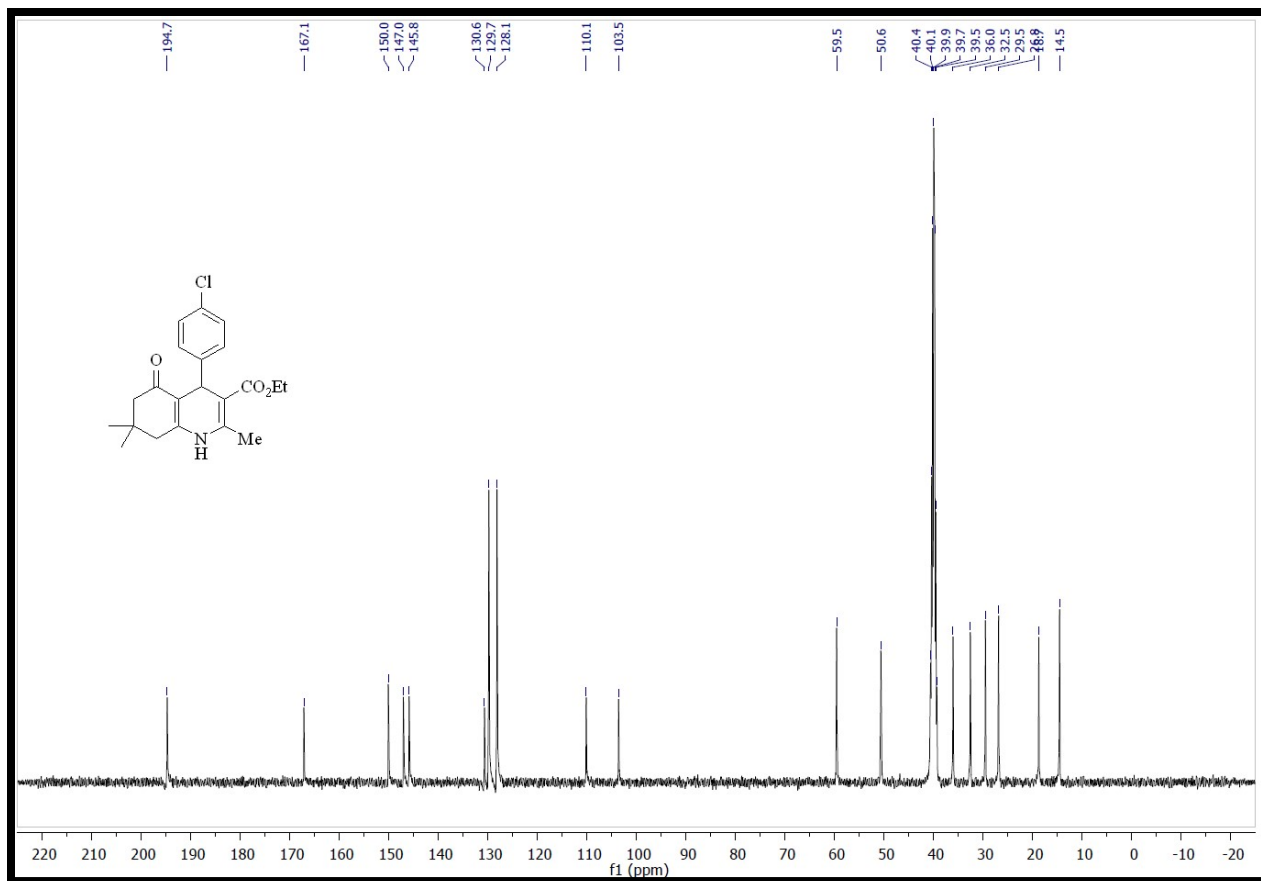

**Fig. S3.**  $^{13}\text{C}$  NMR of ethyl 4-(4-chlorophenyl)-2,7,7-trimethyl-5-oxo-1,4,5,6,7,8-hexahydroquinoline-3-carboxylate

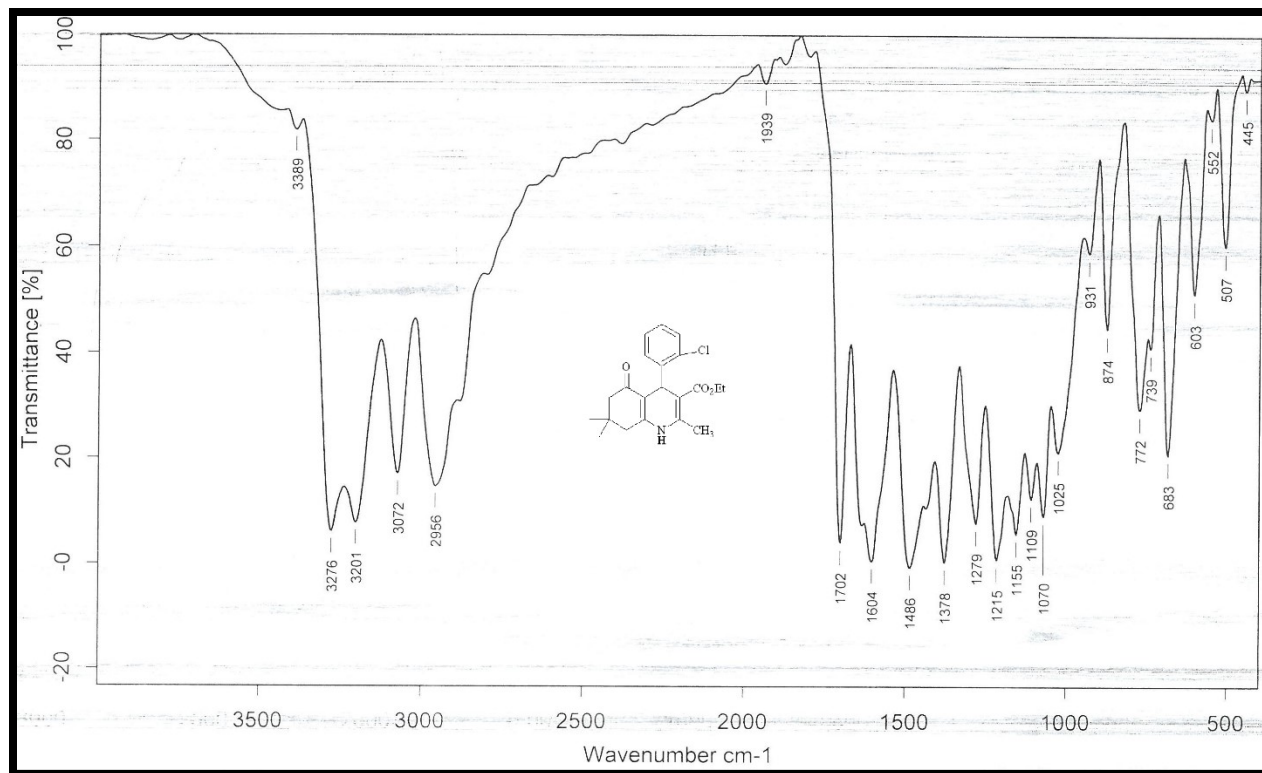

**Fig. S4.** FT-IR of ethyl 4-(2-chlorophenyl)-2,7,7-trimethyl-5-oxo-1,4,5,6,7,8-hexahydroquinoline-3-carboxylate

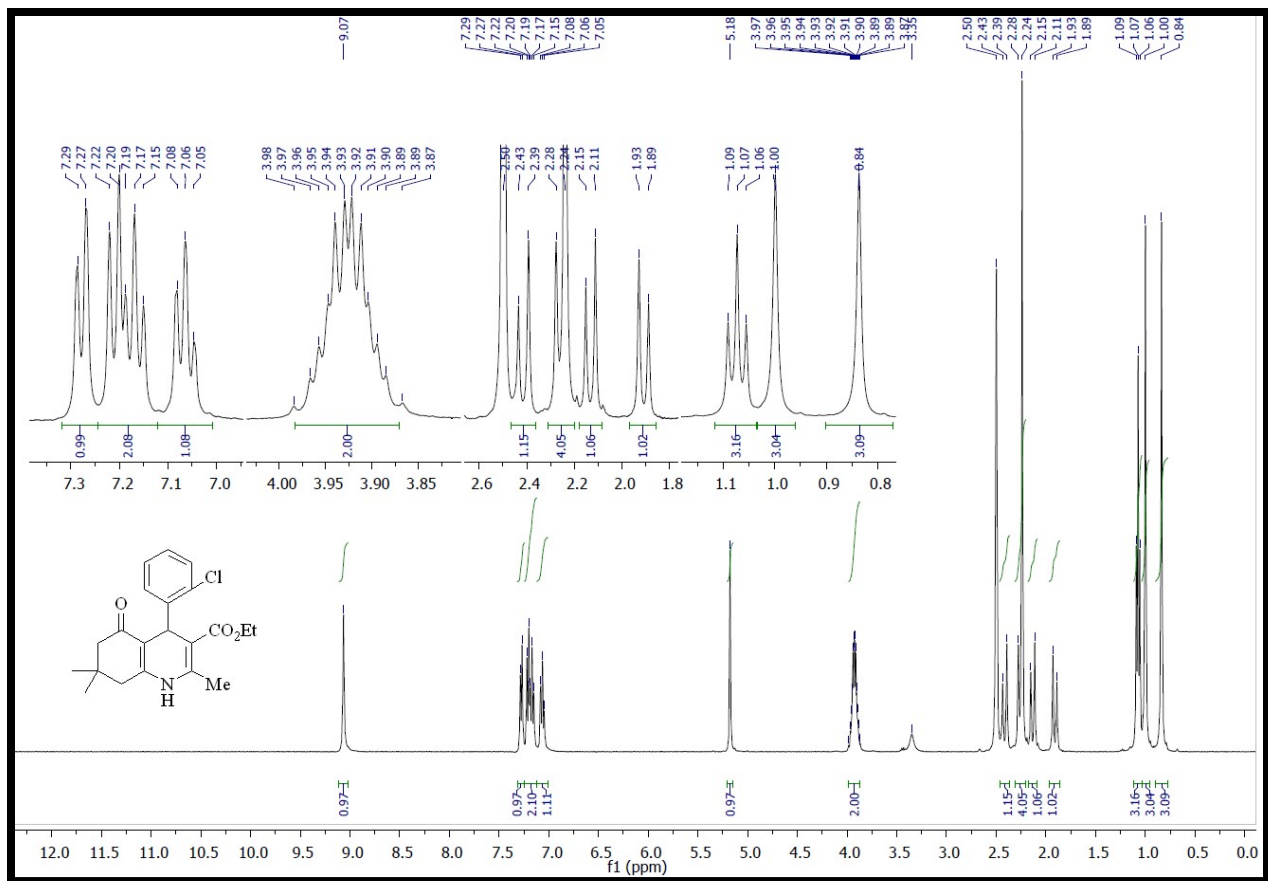

**Fig. S5.** <sup>1</sup>H NMR of ethyl 4-(2-chlorophenyl)-2,7,7-trimethyl-5-oxo-1,4,5,6,7,8-hexahydroquinoline-3-carboxylate

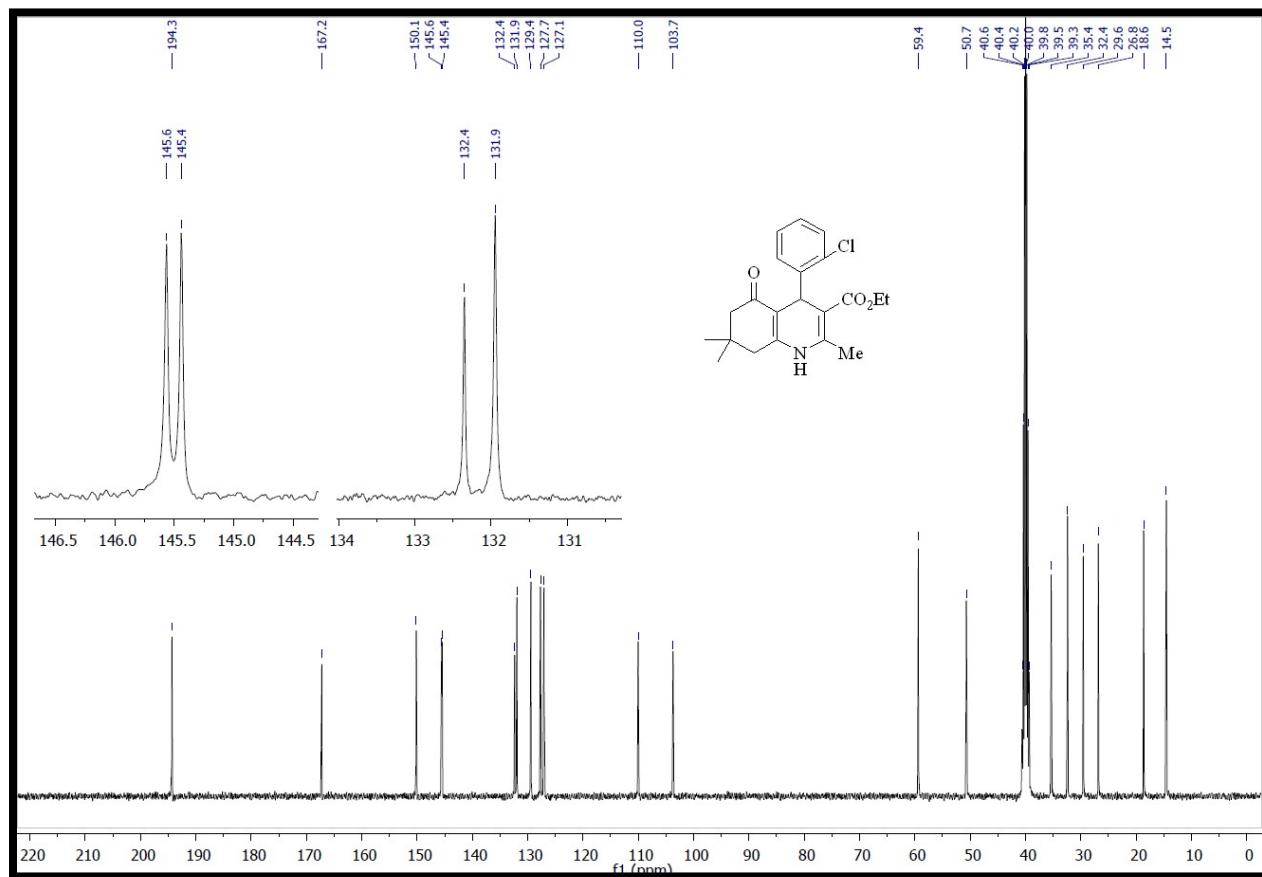

**Fig. S6.**  $^{13}\text{C}$  NMR of ethyl 4-(2-chlorophenyl)-2,7,7-trimethyl-5-oxo-1,4,5,6,7,8-hexahydroquinoline-3-carboxylate

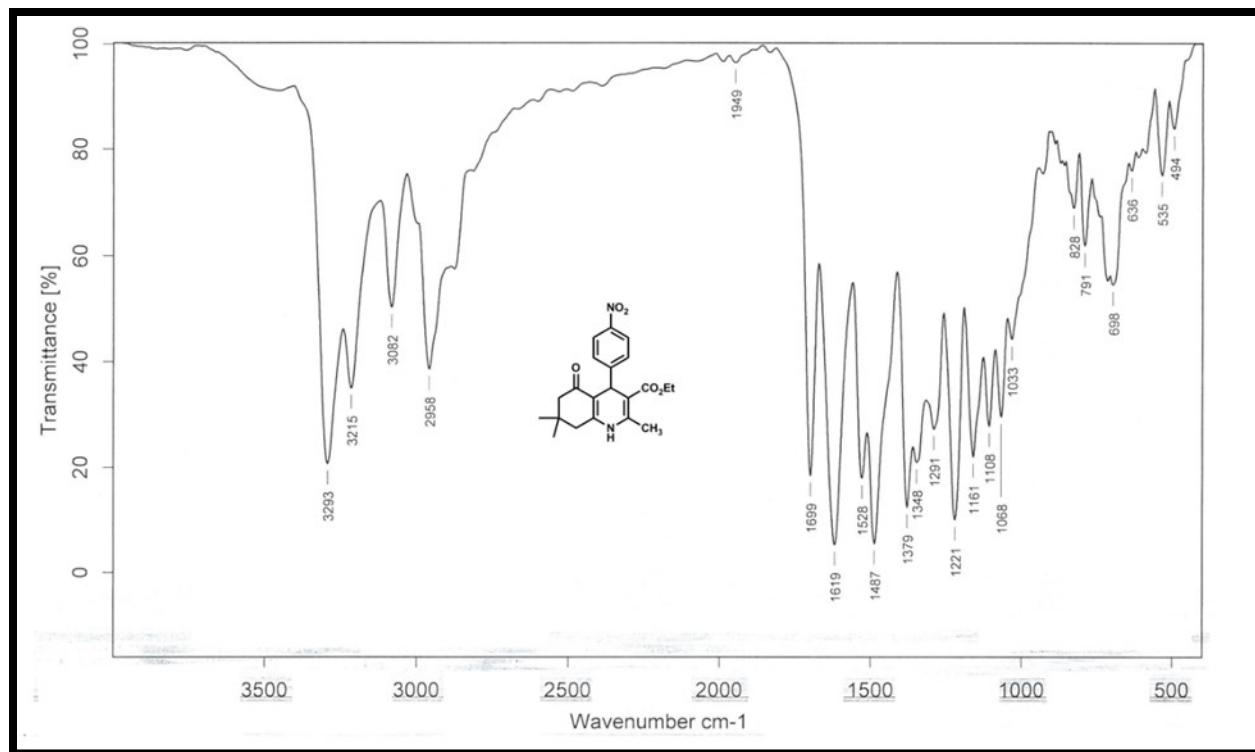

**Fig. S7.** FT-IR of ethyl 2,7,7-trimethyl-4-(4-nitrophenyl)-5-oxo-1,4,5,6,7,8-hexahydroquinoline-3-carboxylate



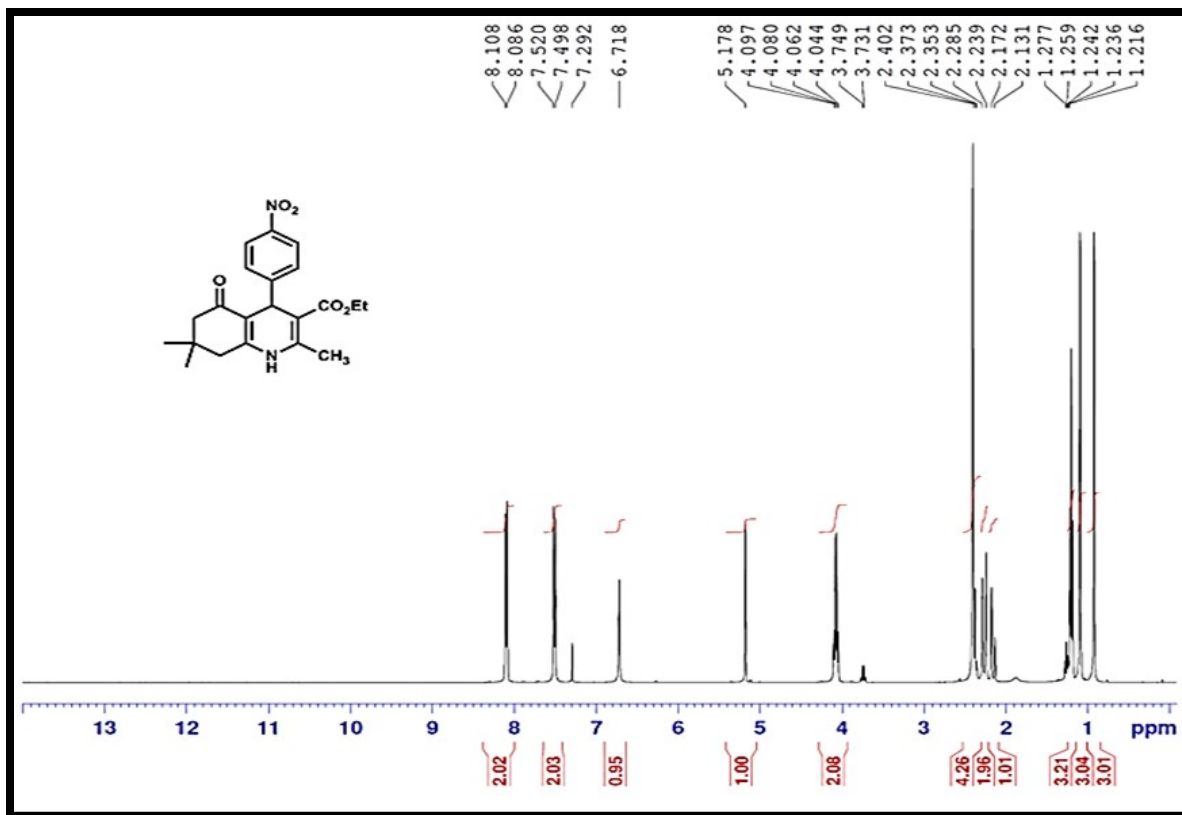

**Fig. S8.** <sup>1</sup>H NMR of ethyl 2,7,7-trimethyl-4-(4-nitrophenyl)-5-oxo-1,4,5,6,7,8-hexahydroquinoline-3-carboxylate

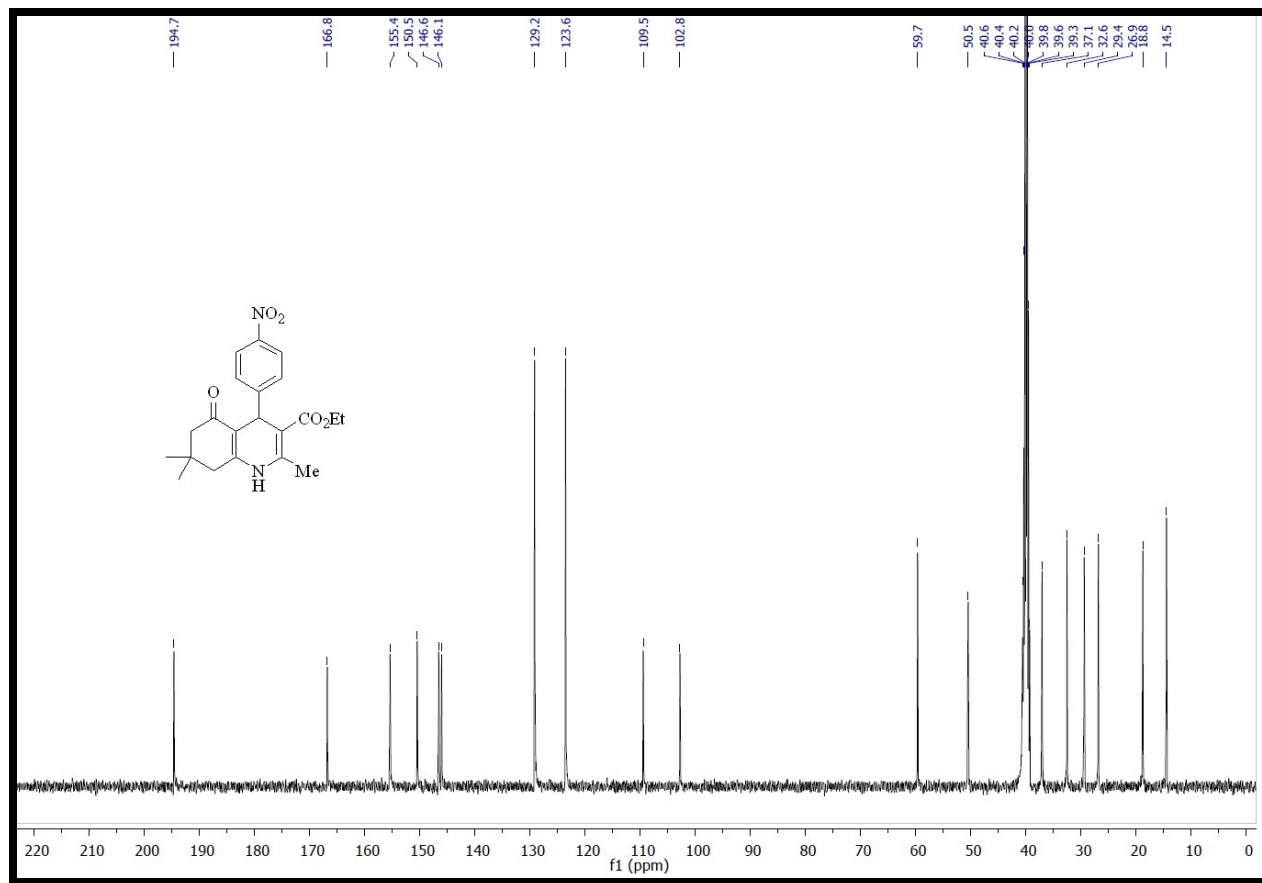

**Fig. S9.** <sup>13</sup>C NMR of ethyl 2,7,7-trimethyl-4-(4-nitrophenyl)-5-oxo-1,4,5,6,7,8-hexahydroquinoline-3-carboxylate

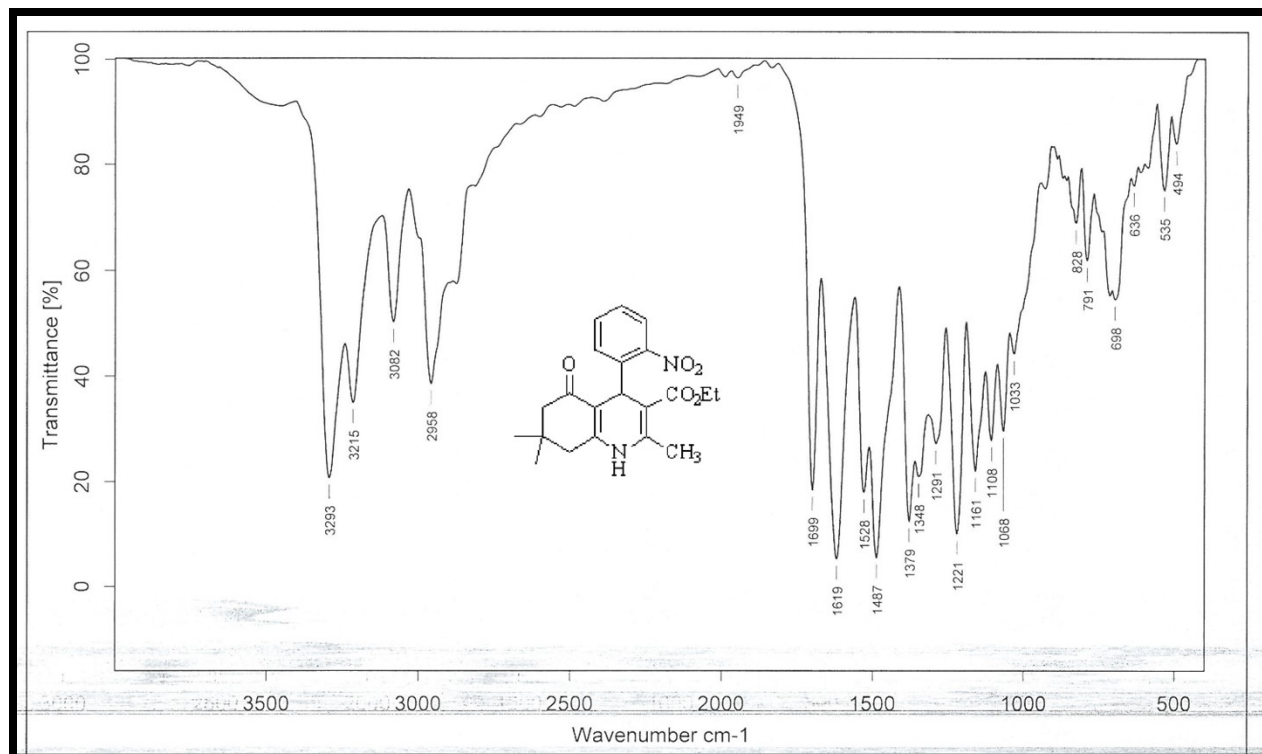

**Fig. S10.** FT-IR of ethyl 2,7,7-trimethyl-4-(2-nitrophenyl)-5-oxo-1,4,5,6,7,8-hexahydroquinoline-3-carboxylate

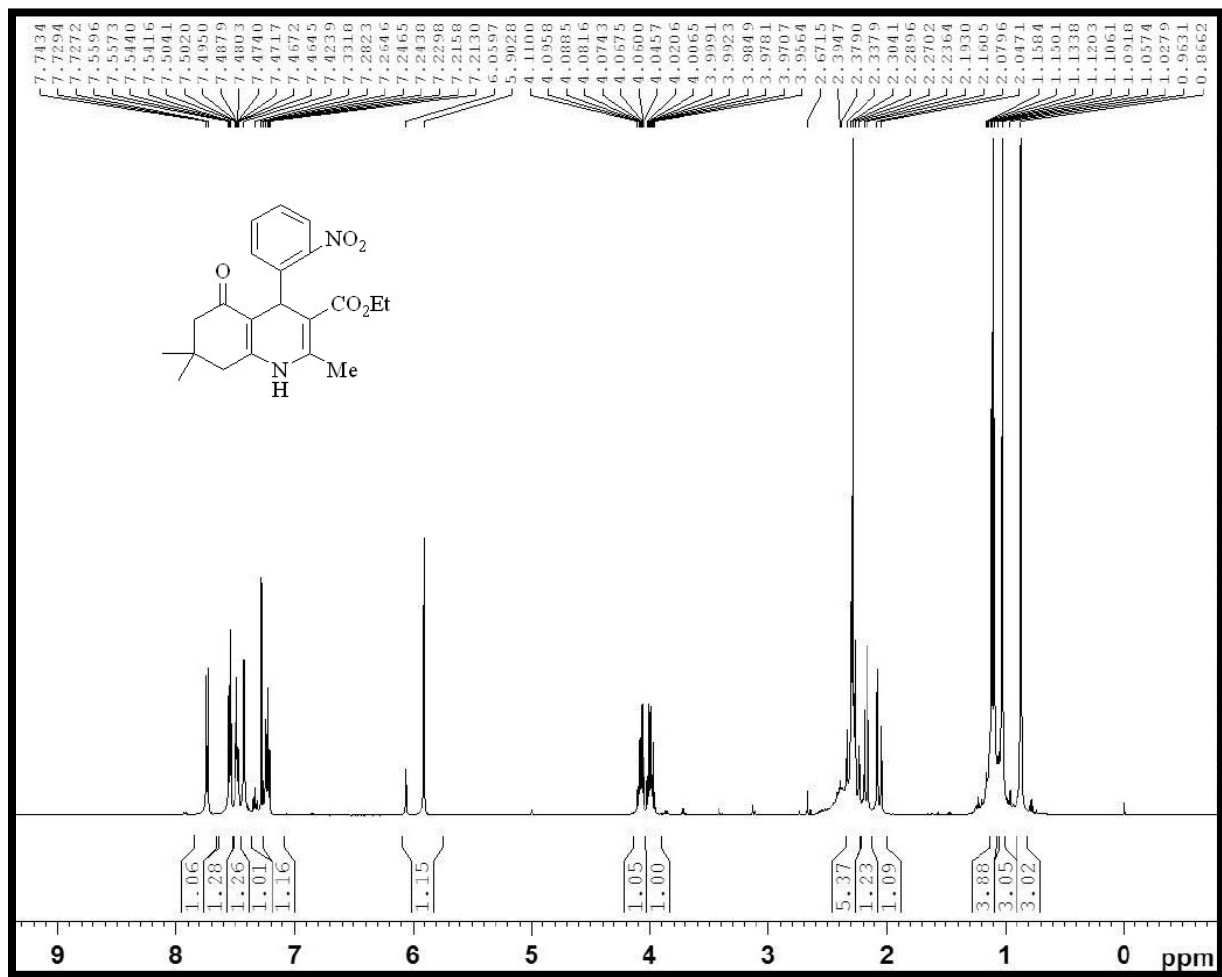

**Fig. S11.** <sup>1</sup>H NMR of ethyl 2,7,7-trimethyl-4-(2-nitrophenyl)-5-oxo-1,4,5,6,7,8-hexahydroquinoline-3-carboxylate

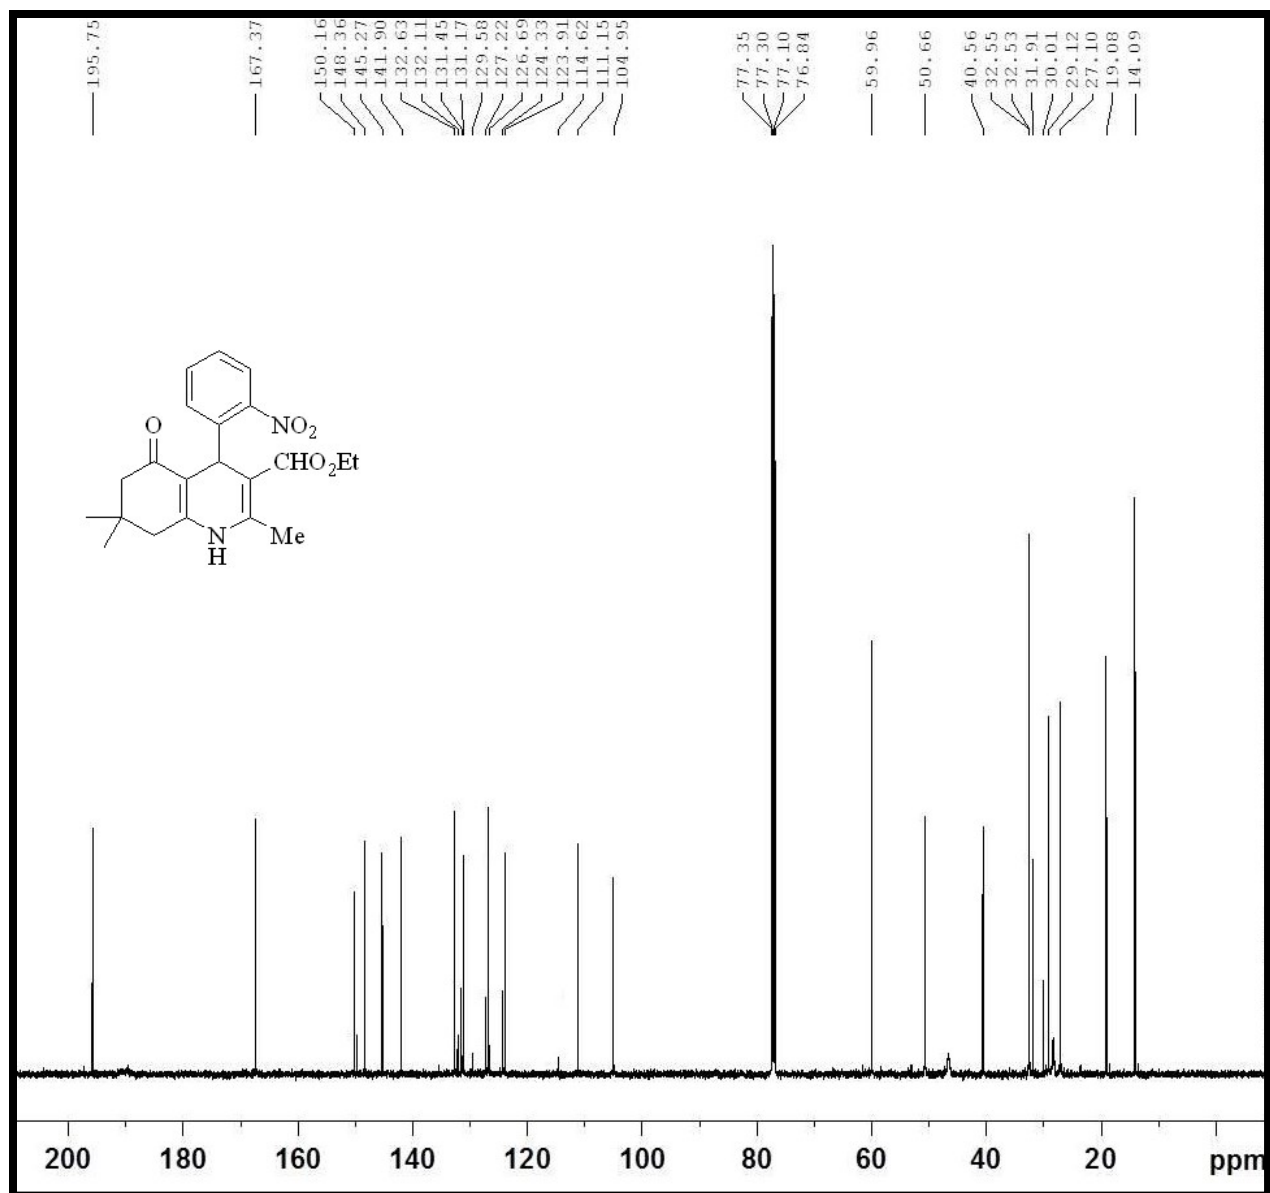

**Fig. S12.** <sup>13</sup>C NMR of ethyl 2,7,7-trimethyl-4-(2-nitrophenyl)-5-oxo-1,4,5,6,7,8-hexahydroquinoline-3-carboxylate

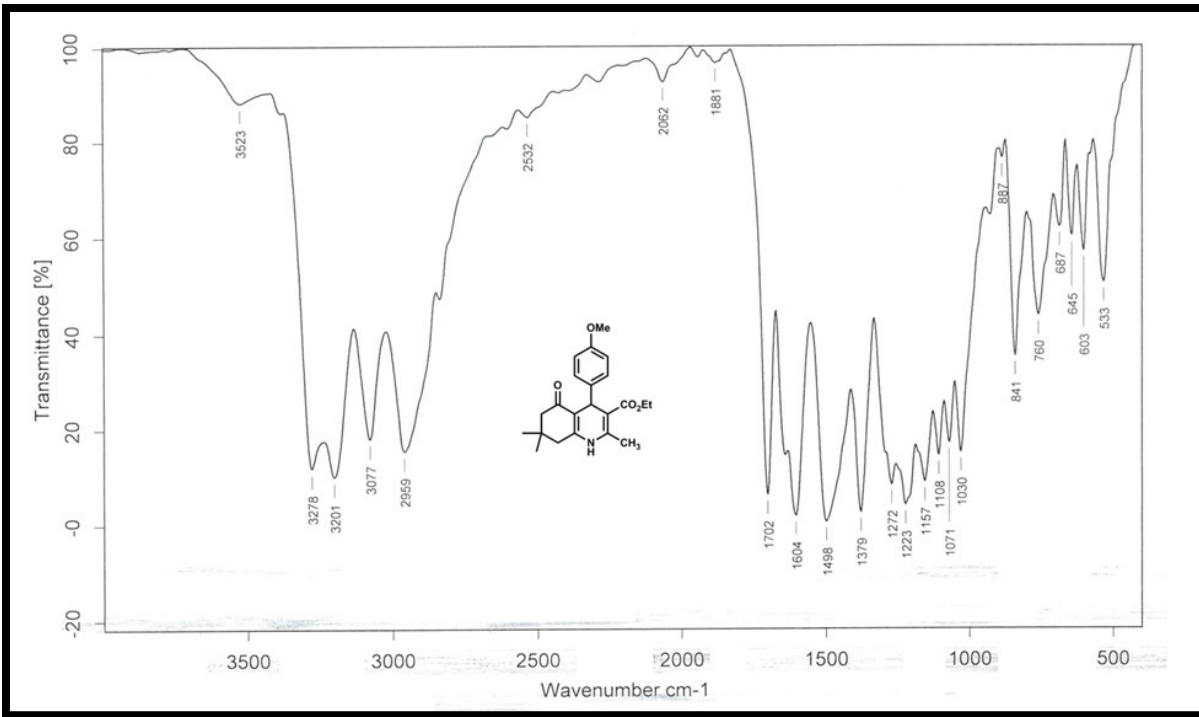

**Fig. S13.** FT-IR of ethyl 4-(4-methoxyphenyl)-2,7,7-trimethyl-5-oxo-1,4,5,6,7,8-hexahydroquinoline-3-carboxylate

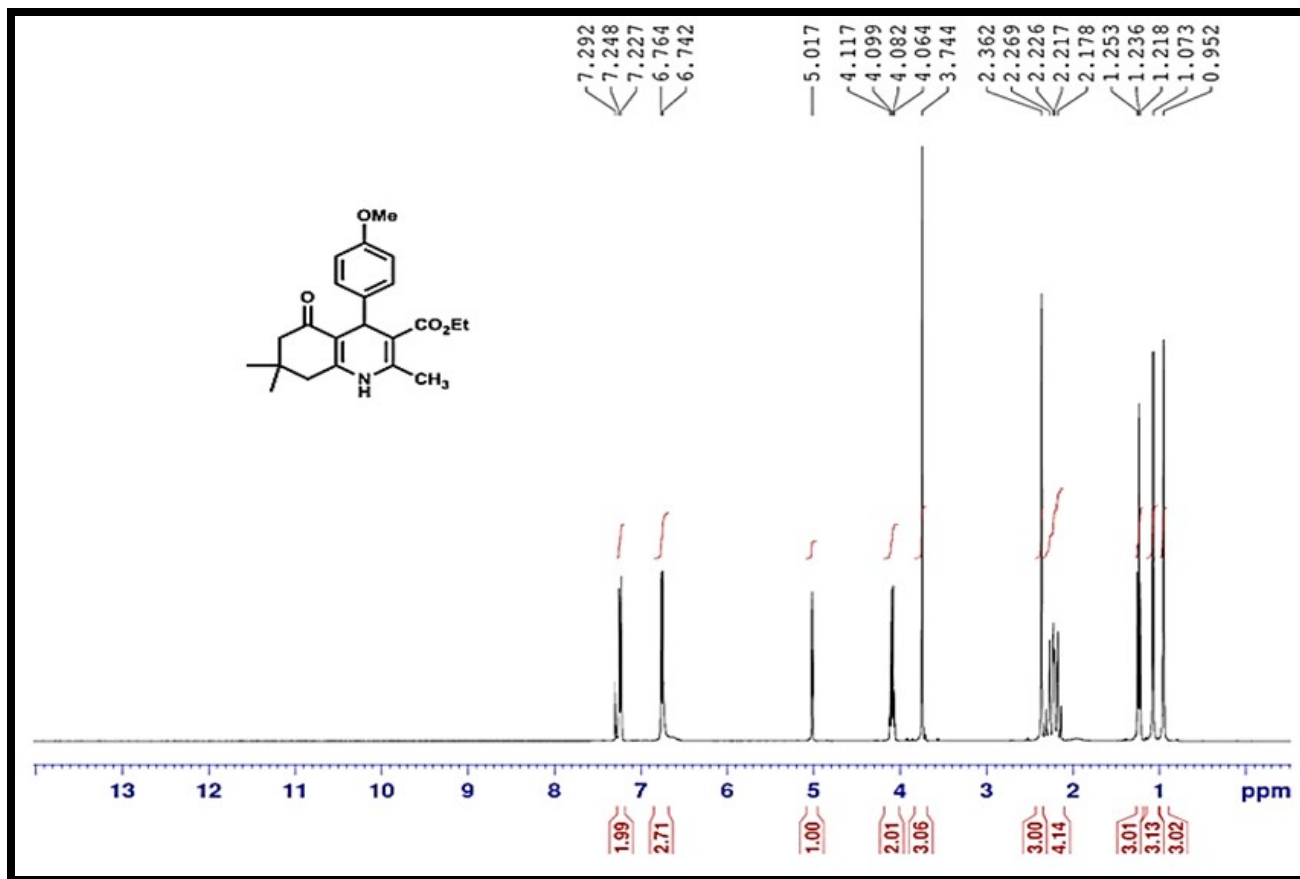

**Fig. S14.** <sup>1</sup>H NMR of ethyl 4-(4-methoxyphenyl)-2,7,7-trimethyl-5-oxo-1,4,5,6,7,8-hexahydroquinoline-3-carboxylate

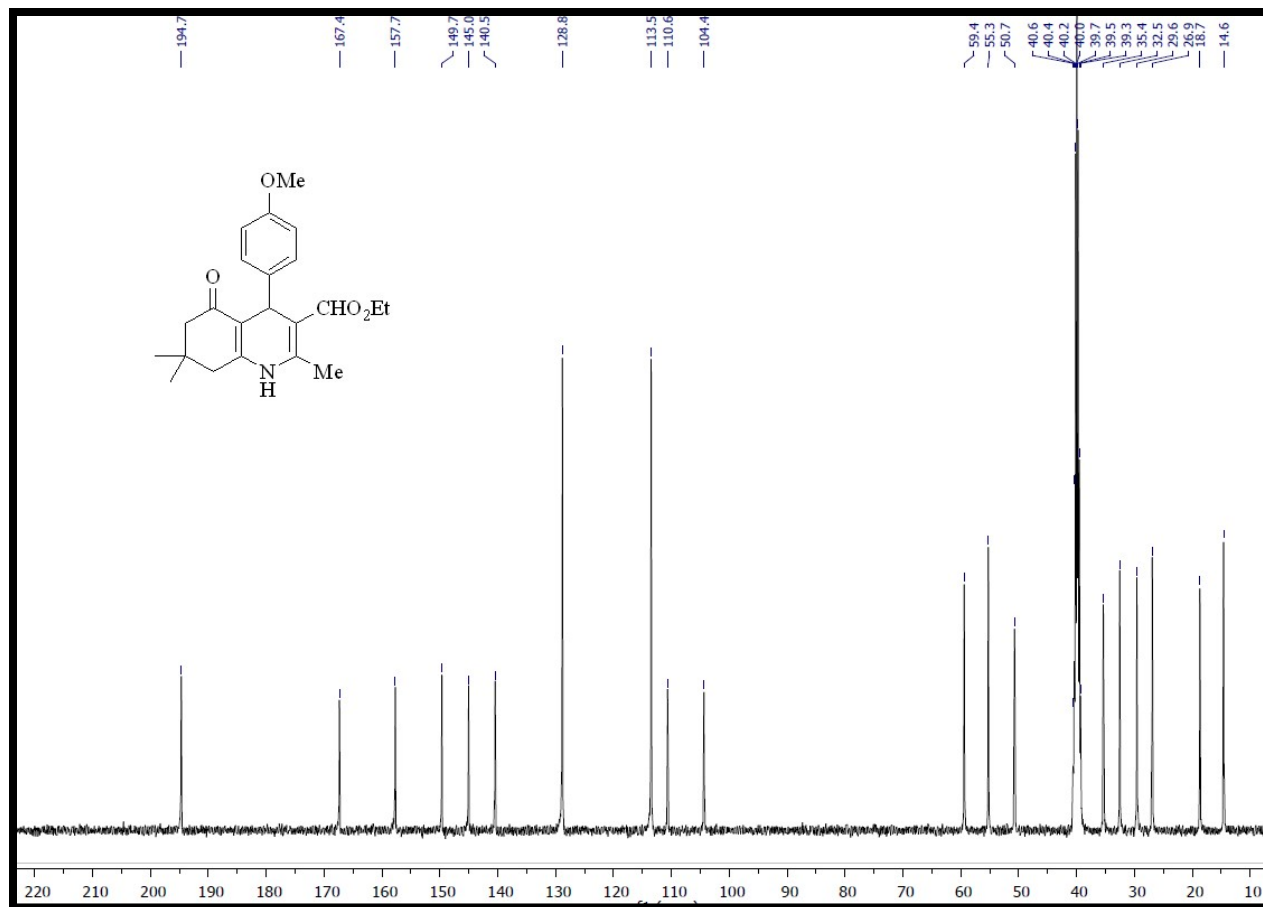

**Fig. S15.** <sup>13</sup>C NMR of ethyl 4-(4-methoxyphenyl)-2,7,7-trimethyl-5-oxo-1,4,5,6,7,8-hexahydroquinoline-3-carboxylate



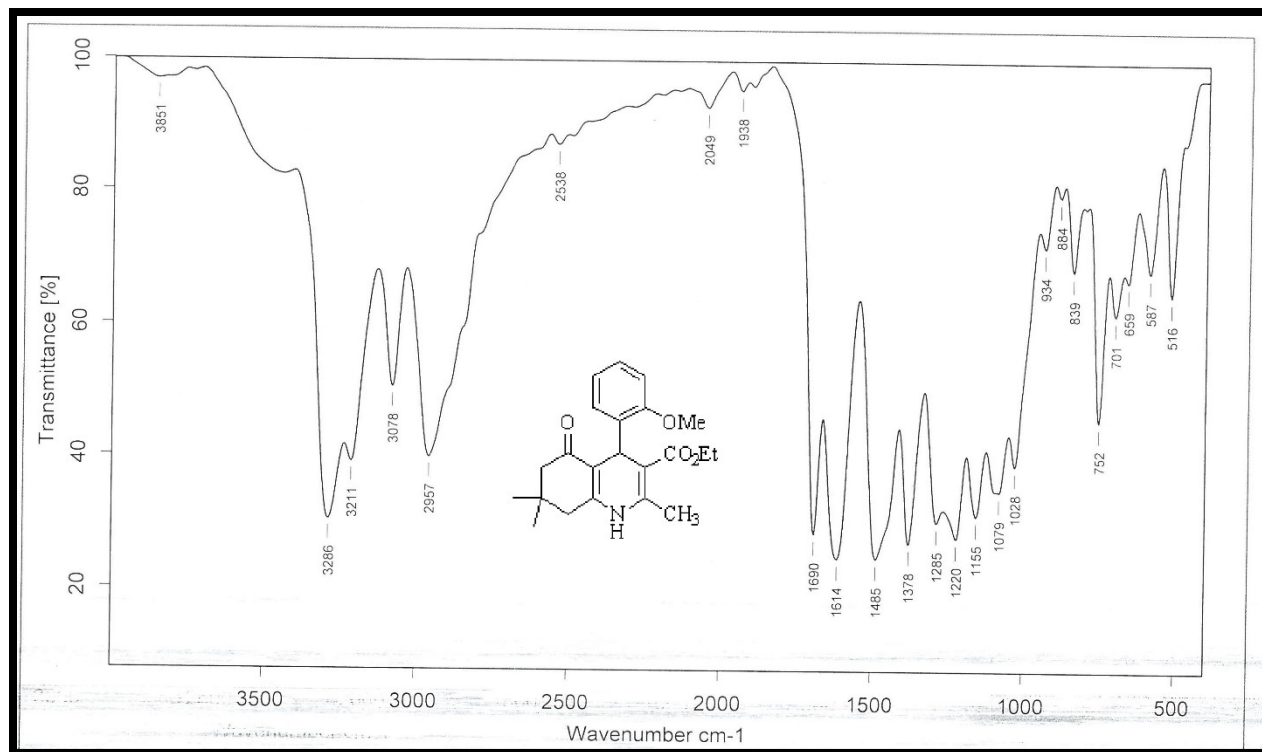

**Fig. S16.** FT-IR of ethyl 4-(2-methoxyphenyl)-2,7,7-trimethyl-5-oxo-1,4,5,6,7,8-hexahydroquinoline-3-carboxylate

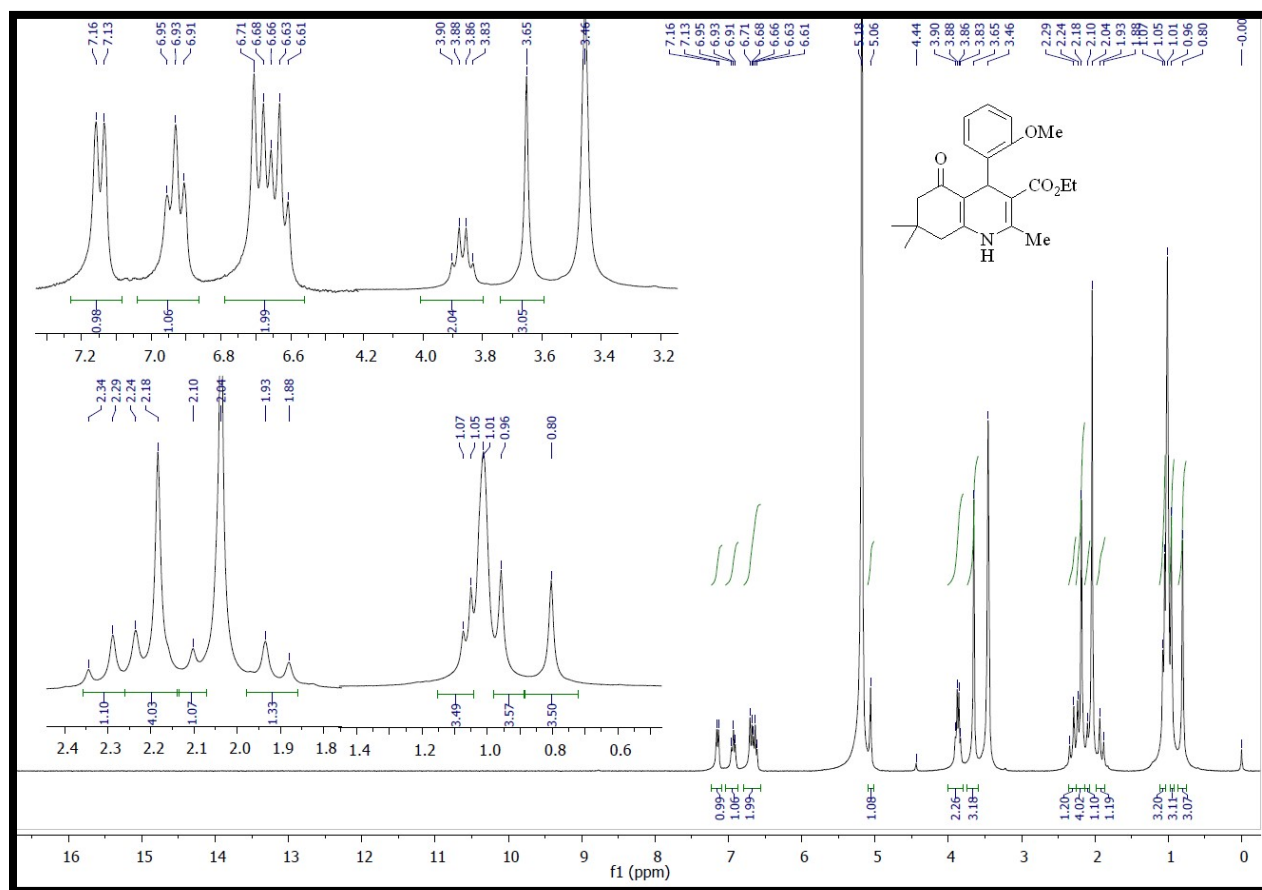

**Fig. S17.** <sup>1</sup>H NMR of ethyl 4-(2-methoxyphenyl)-2,7,7-trimethyl-5-oxo-1,4,5,6,7,8-hexahydroquinoline-3-carboxylate

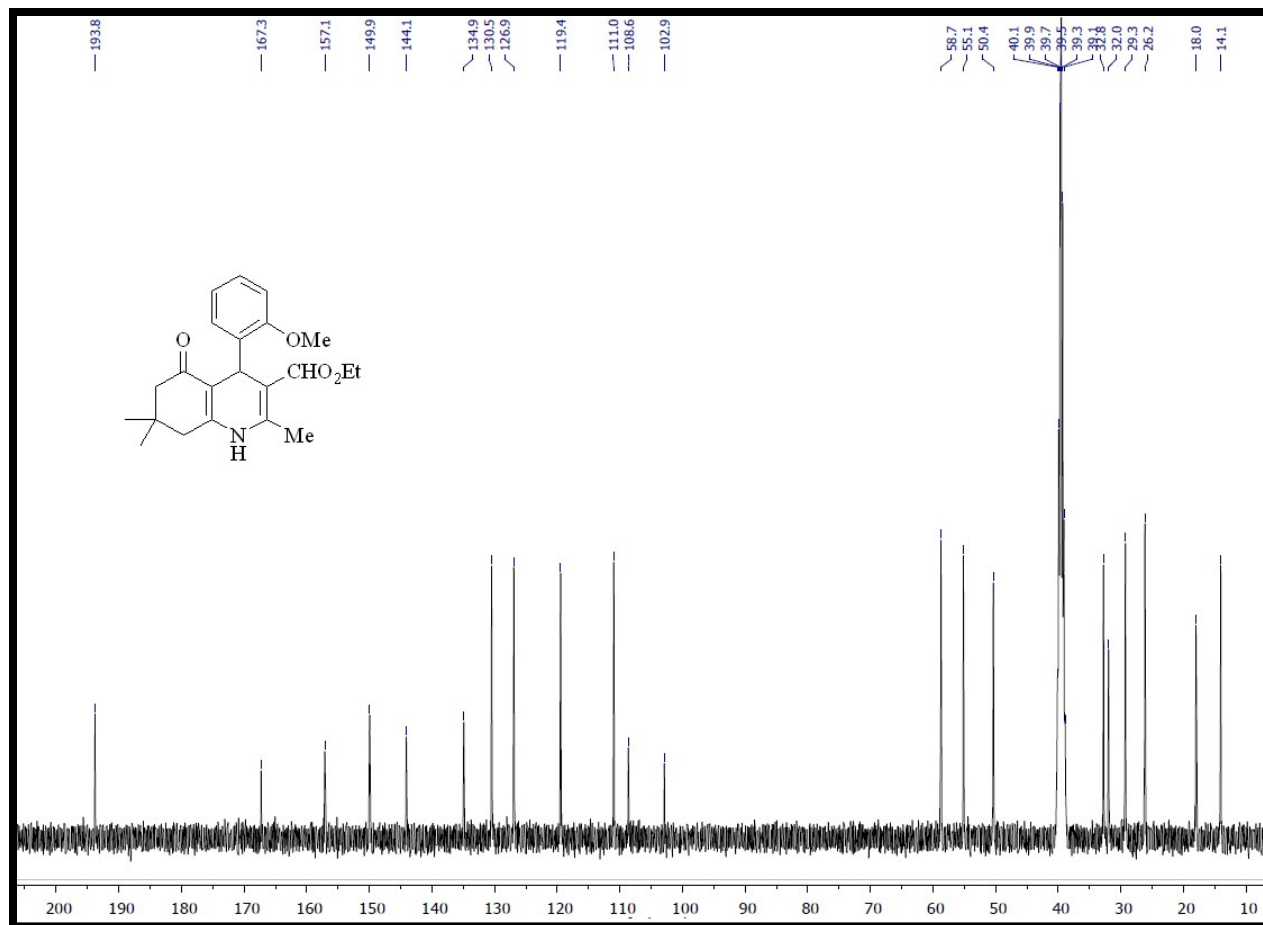

**Fig. S18.** <sup>13</sup>C NMR of ethyl 4-(2-methoxyphenyl)-2,7,7-trimethyl-5-oxo-1,4,5,6,7,8-hexahydroquinoline-3-carboxylate

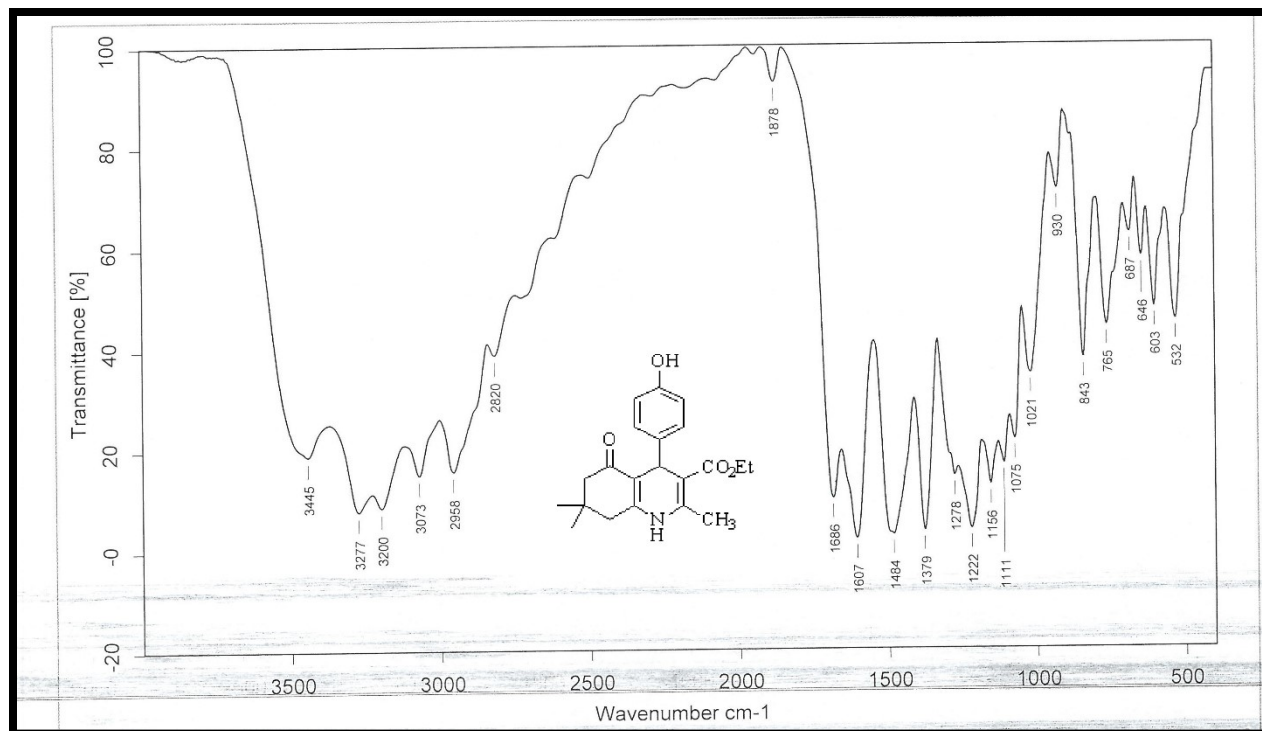

**Fig. S19.** FT-IR of ethyl 4-(4-hydroxyphenyl)-2,7,7-trimethyl-5-oxo-1,4,5,6,7,8-hexahydroquinoline-3-carboxylate

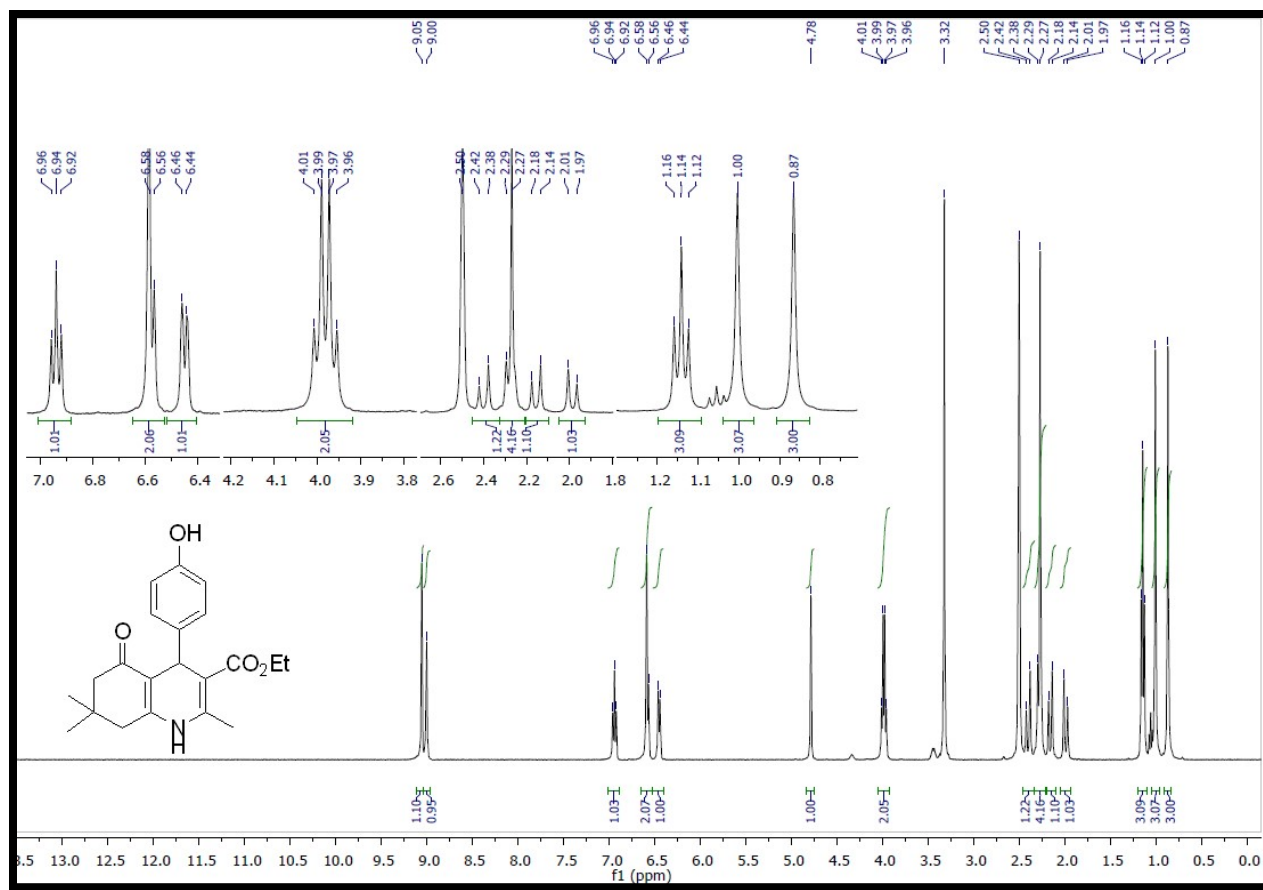

**Fig. S20.** <sup>1</sup>H NMR of ethyl 4-(4-hydroxyphenyl)-2,7,7-trimethyl-5-oxo-1,4,5,6,7,8-hexahydroquinoline-3-carboxylate

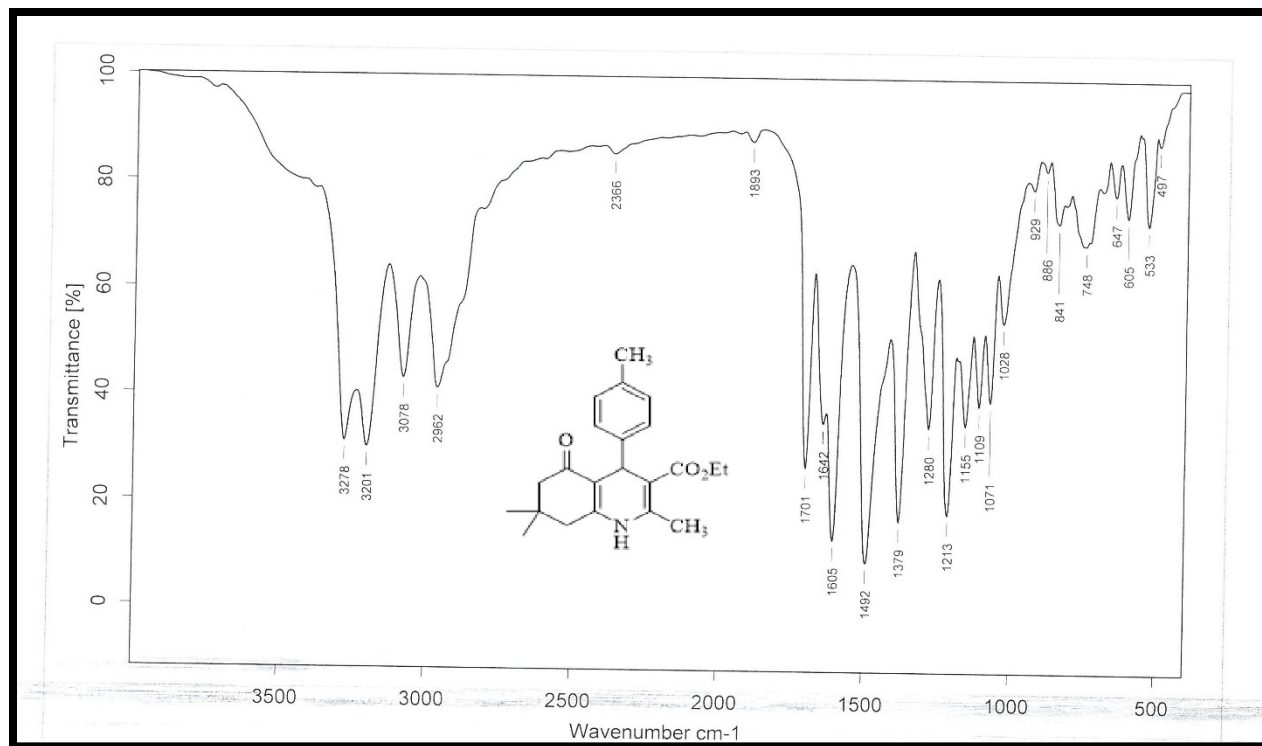

**Fig. S21.** FT-IR of ethyl 2,7,7-trimethyl-5-oxo-4-(p-tolyl)-1,4,5,6,7,8-hexahydroquinoline-3-carboxylate

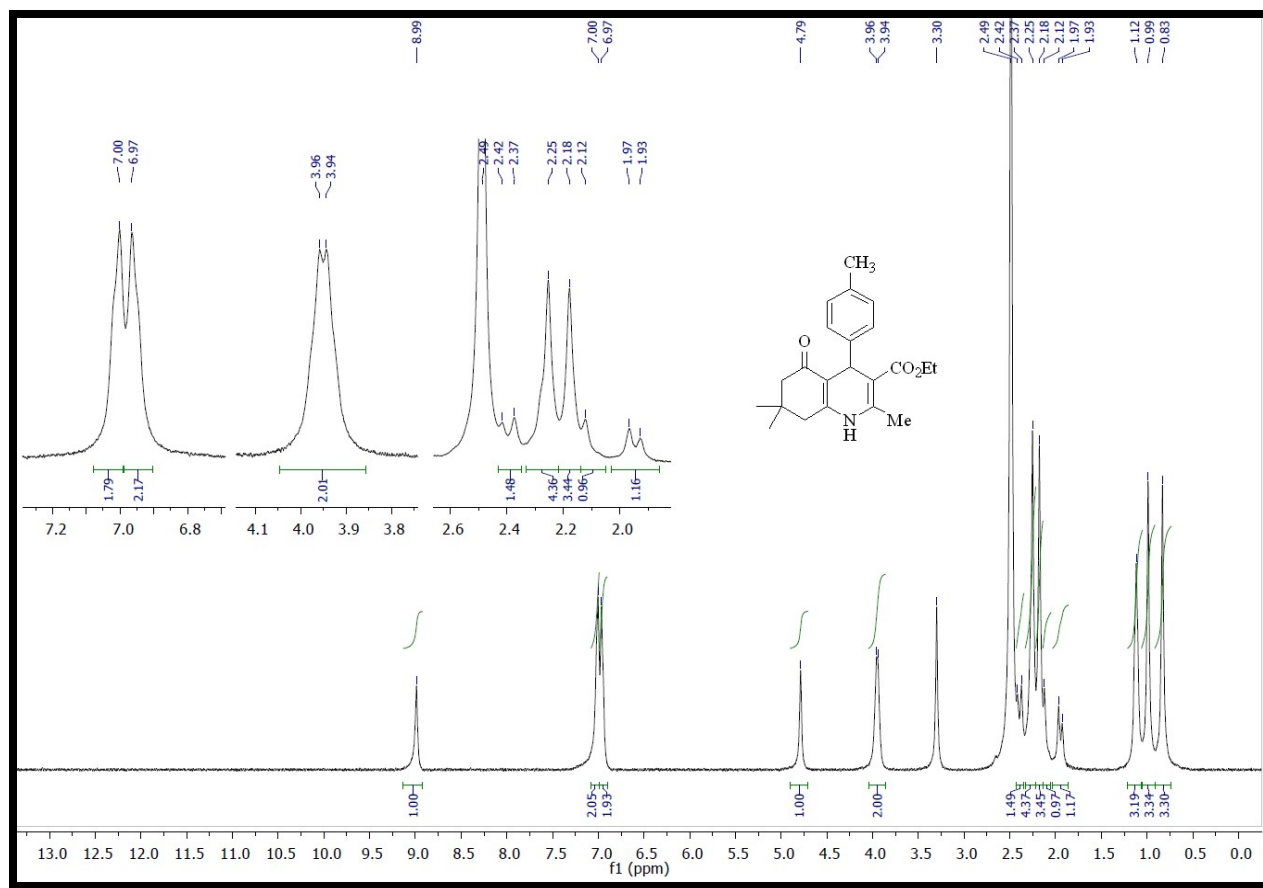

**Fig. S22.** <sup>1</sup>H NMR of ethyl 2,7,7-trimethyl-5-oxo-4-(p-tolyl)-1,4,5,6,7,8-hexahydroquinoline-3-carboxylate

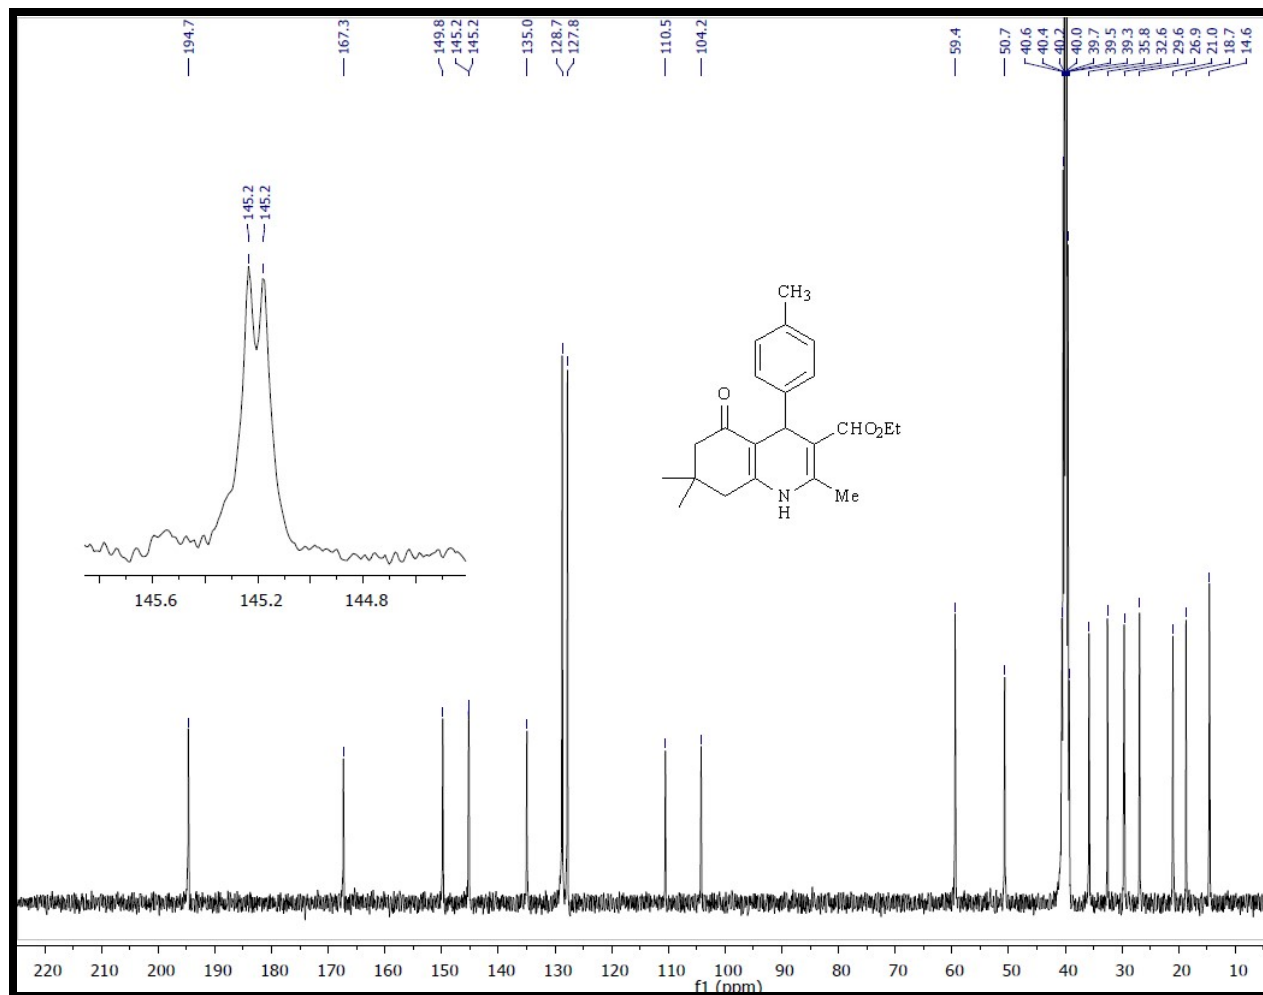

**Fig. S23.**  $^{13}\text{C}$  NMR of ethyl 2,7,7-trimethyl-5-oxo-4-(p-tolyl)-1,4,5,6,7,8-hexahydroquinoline-3-carboxylate



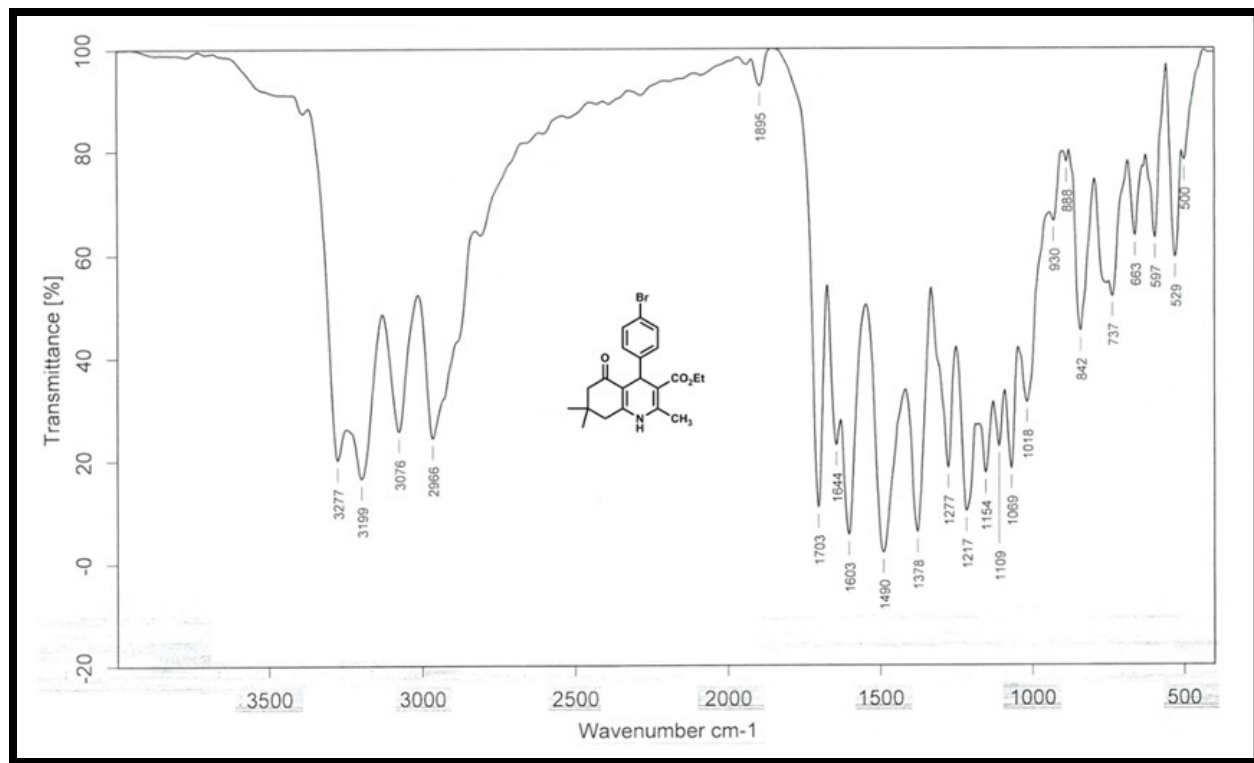

**Fig. S24.** FT-IR of ethyl-4-(4-bromophenyl)-2,7,7-trimethyl-5-oxo-1,4,5,6,7,8-hexahydroquinoline-3-carboxylate.

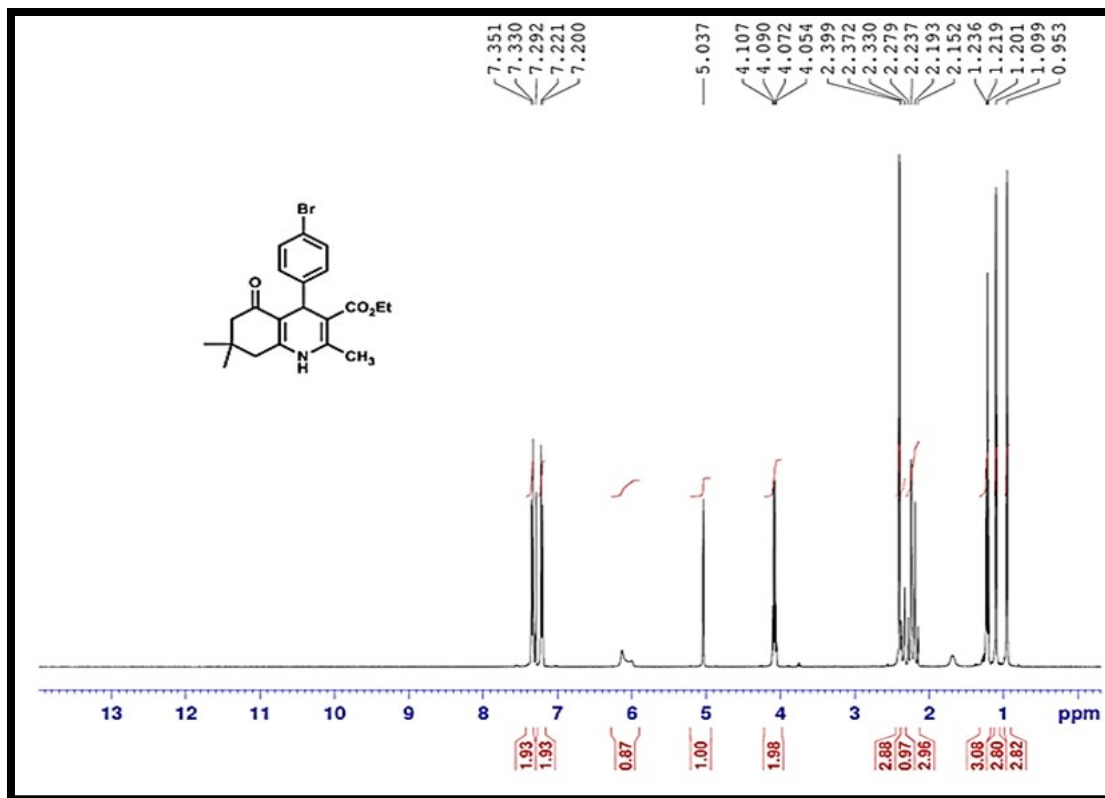

Fig. S25. <sup>1</sup>H NMR of ethyl-4-(4-bromophenyl)-2,7,7-trimethyl-5-oxo-1,4,5,6,7,8-hexahydroquinoline-3-carboxylate

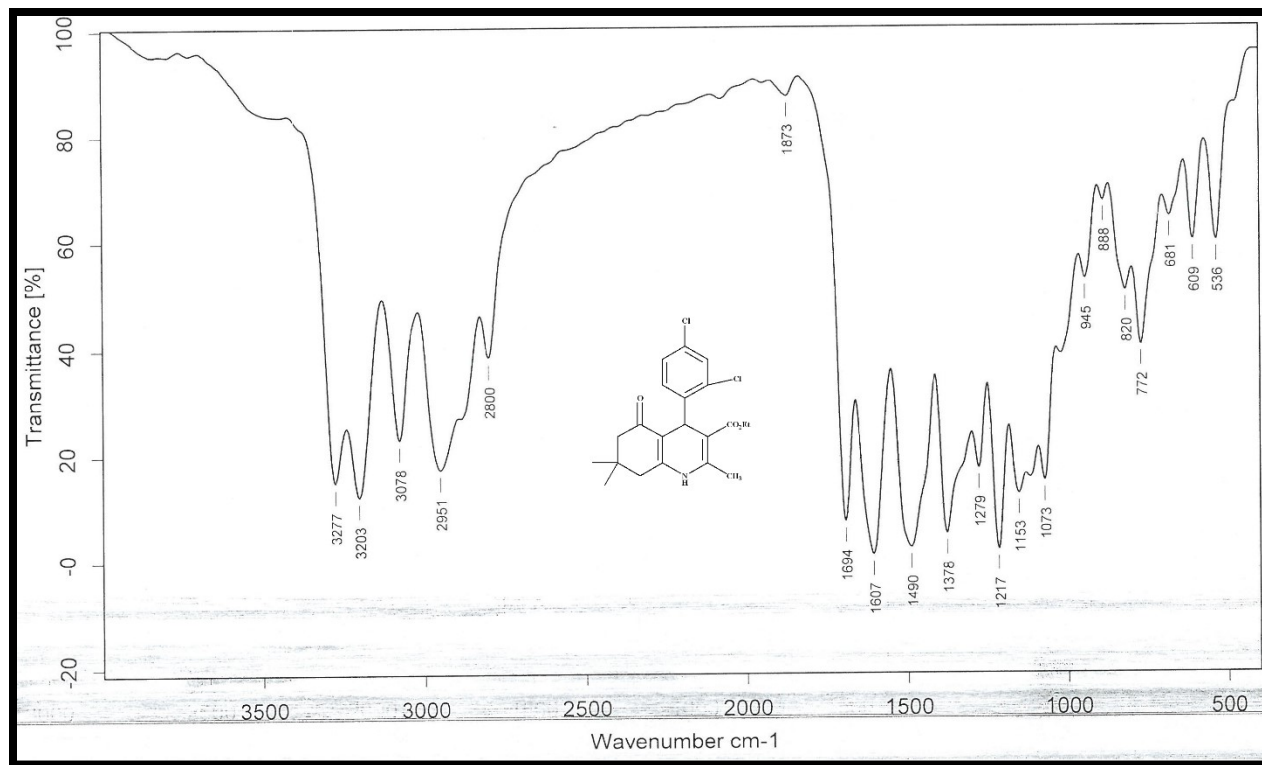

**Fig. S26.** FT-IR of ethyl-4-(2,4-dichlorophenyl)-2,7,7-trimethyl-5-oxo-1,4,5,6,7,8-hexahydroquinoline-3-carboxylate

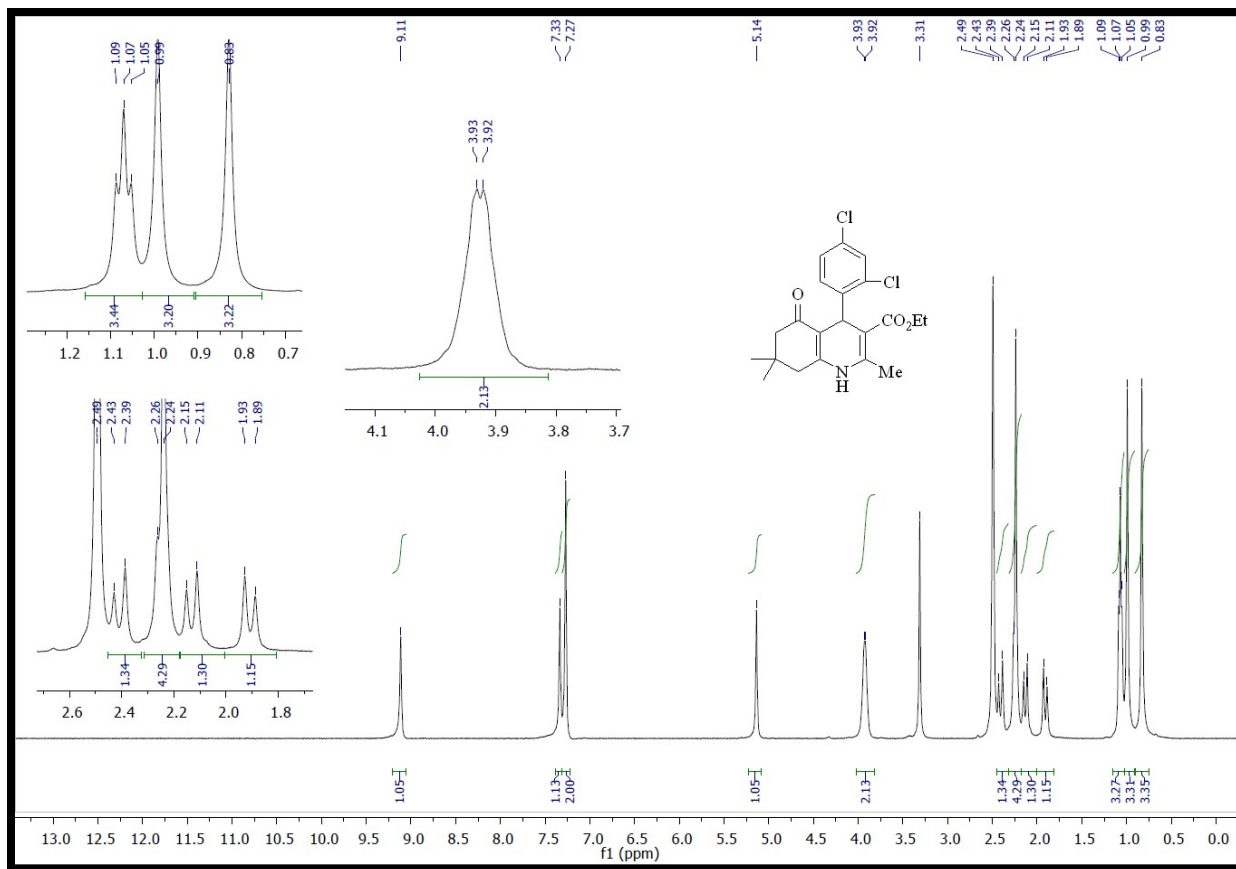

**Fig. S27.**  $^1\text{H}$  NMR of ethyl-4-(2,4-dichlorophenyl)-2,7,7-trimethyl-5-oxo-1,4,5,6,7,8-hexahydroquinoline-3-carboxylate

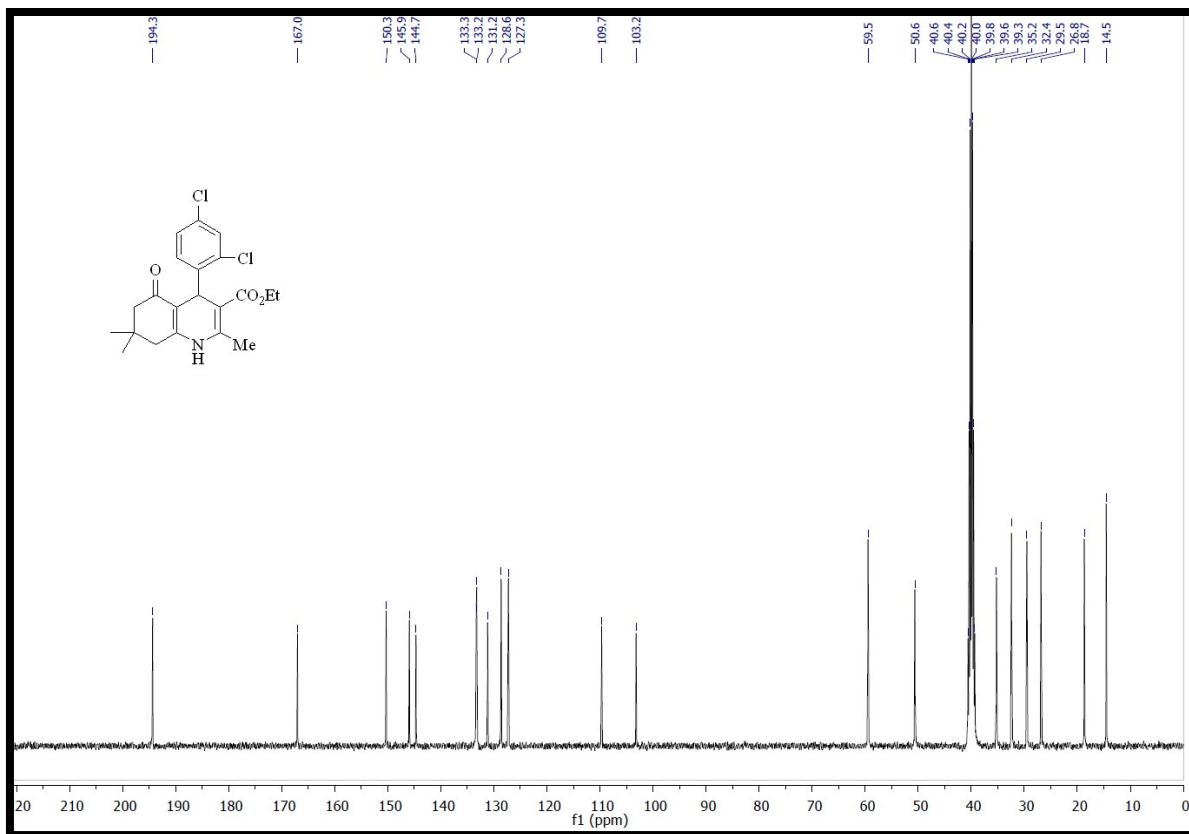

**Fig. S28.** <sup>13</sup>C NMR of ethyl-4-(2,4-dichlorophenyl)-2,7,7-trimethyl-5-oxo-1,4,5,6,7,8-hexahydroquinoline-3-carboxylate

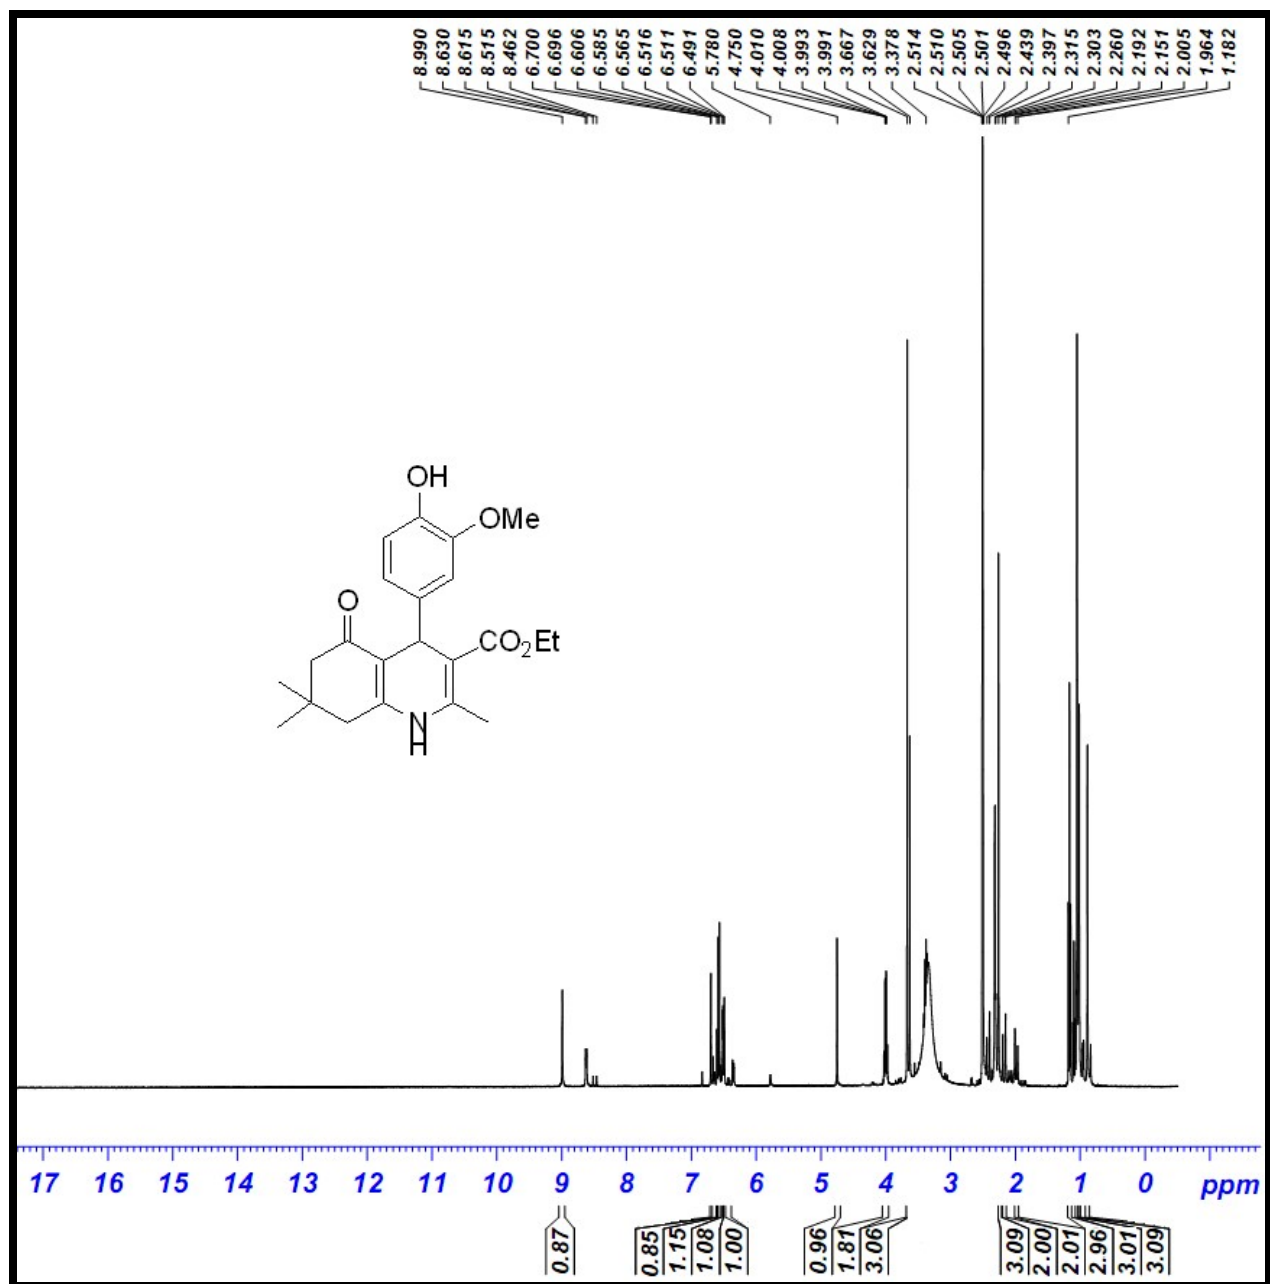

**Fig. S29.** <sup>1</sup>H NMR of ethyl-4-(4-hydroxy-3-methoxyphenyl)-2,7,7-trimethyl-5-oxo-1,4,5,6,7,8-hexahydroquinoline-3 carboxylate

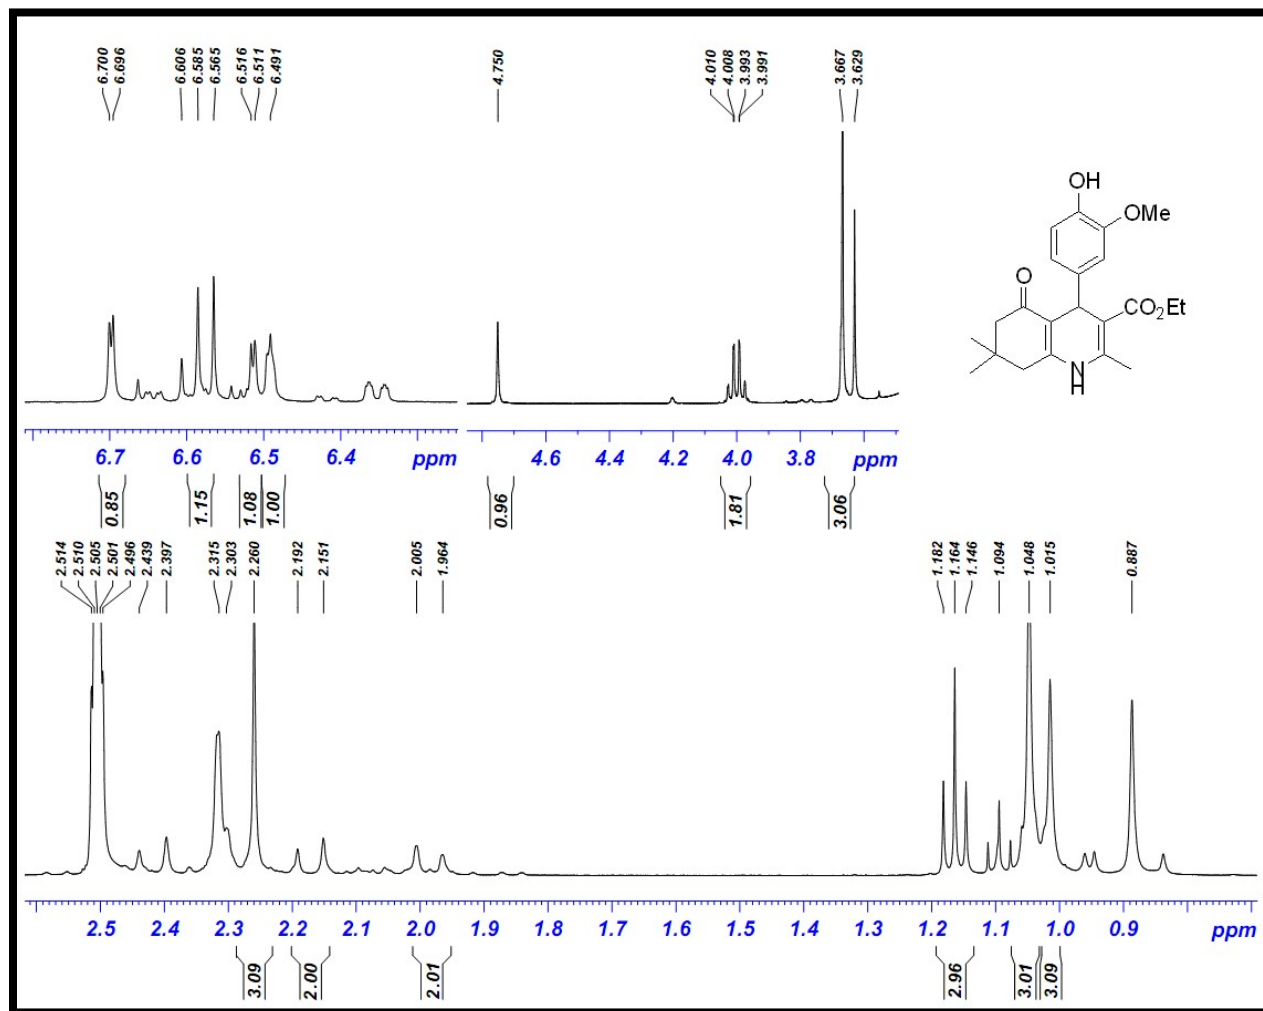

**Fig. S30.** <sup>1</sup>H NMR of ethyl-4-(4-hydroxy-3-methoxyphenyl)-2,7,7-trimethyl-5-oxo-1,4,5,6,7,8-hexahydroquinoline-3-carboxylate

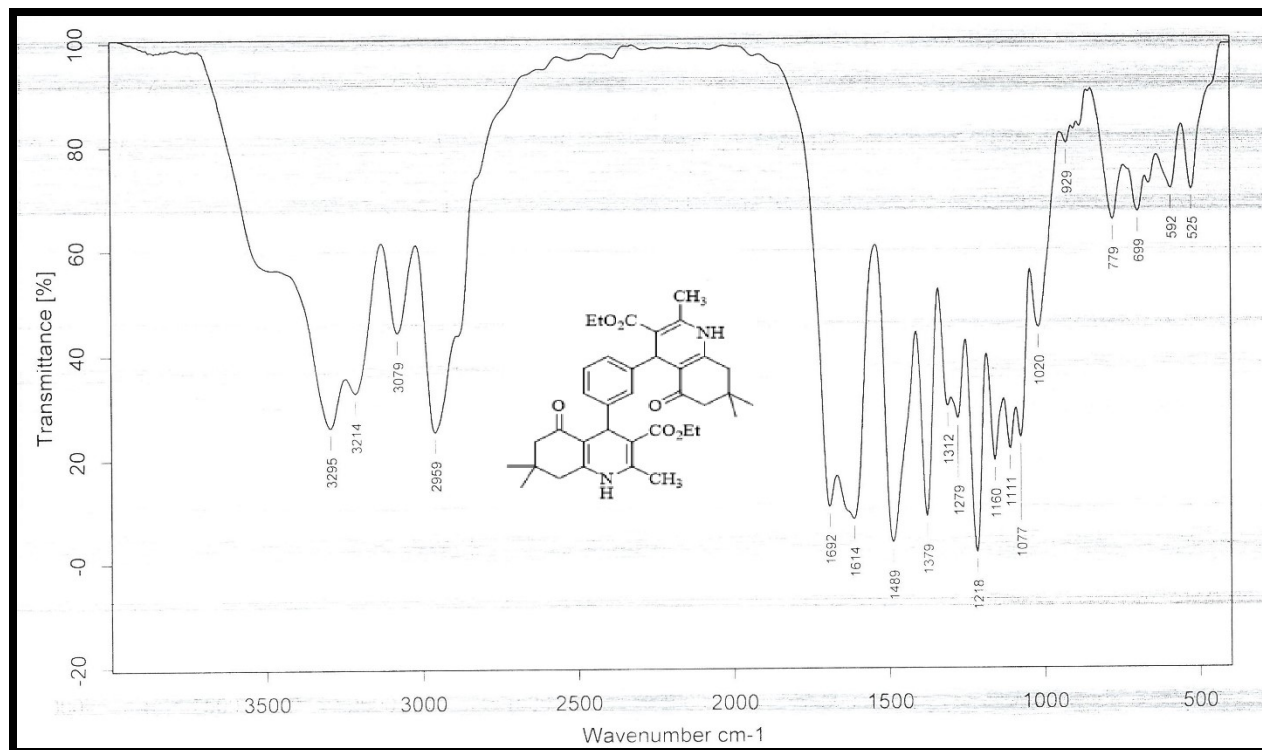

**Fig. S31.** FT-IR of diethyl 4,4'-(1,3-phenylene)bis(2,7,7-trimethyl-5-oxo-1,4,5,6,7,8-hexahydroquinoline-3-carboxylate)



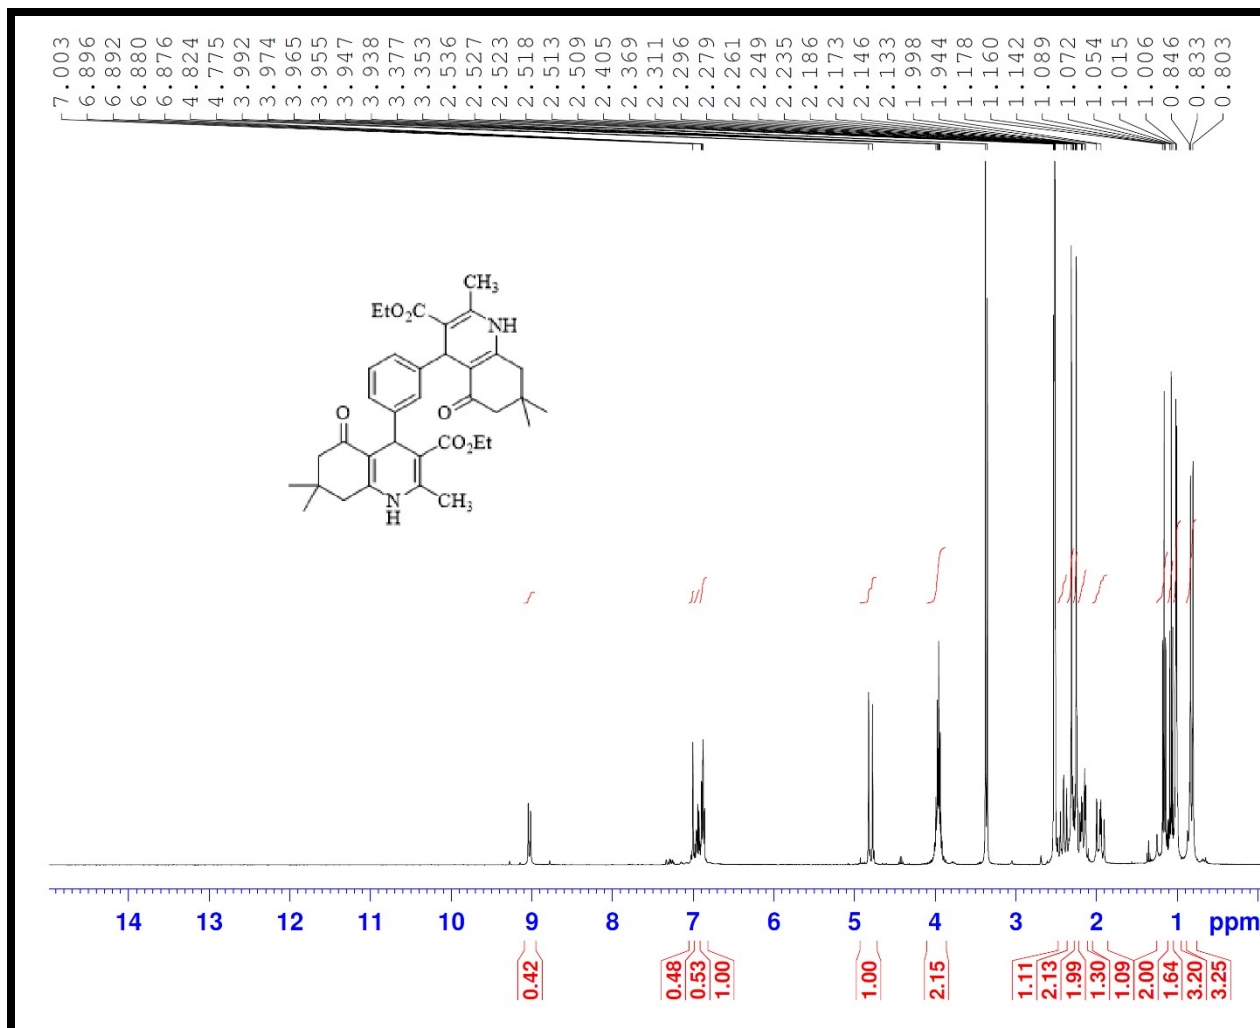

**Fig. S32.** <sup>1</sup>H NMR of diethyl 4,4'-(1,3-phenylene) bis(2,7,7-trimethyl-5-oxo-1,4,5,6,7,8-hexahydroquinoline-3-carboxylate)

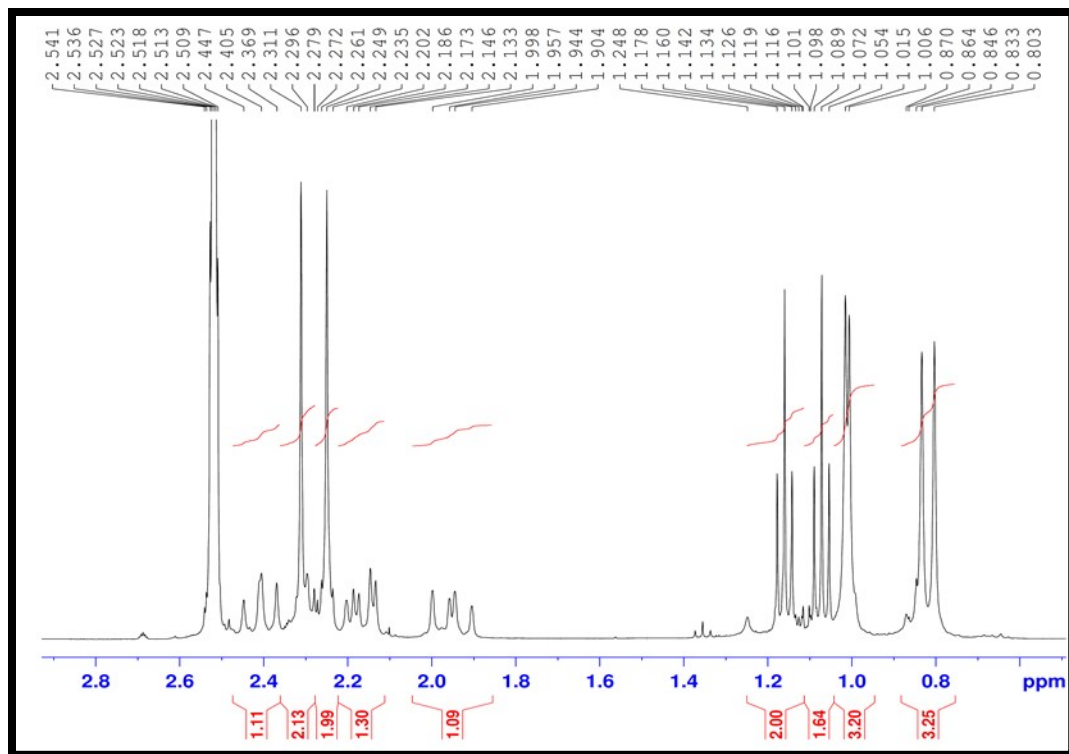

**Fig. S33.**  $^1\text{H}$  NMR of diethyl 4,4'-(1,3-phenylene) bis(2,7,7-trimethyl-5-oxo-1,4,5,6,7,8-hexahydroquinoline-3-carboxylate)

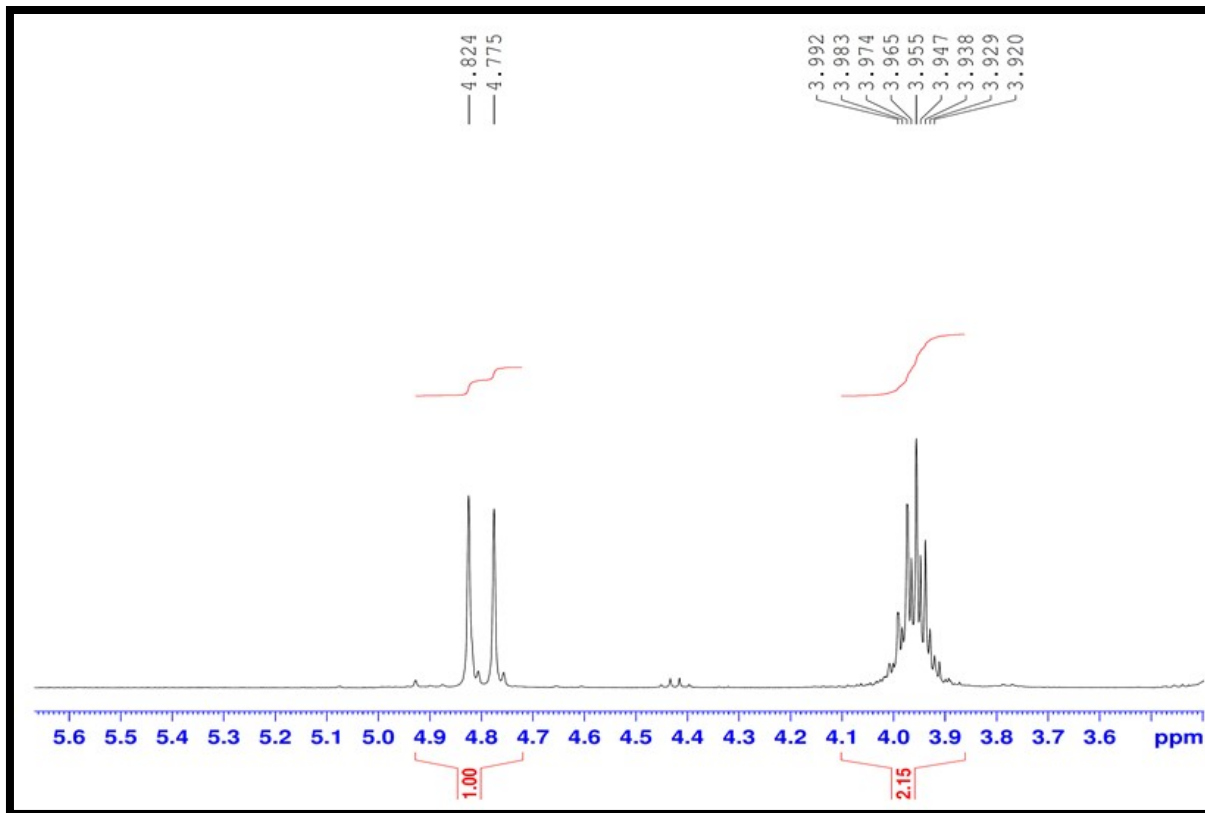

**Fig. S34.**  $^1\text{H}$  NMR of diethyl 4,4'-(1,3-phenylene) bis(2,7,7-trimethyl-5-oxo-1,4,5,6,7,8-hexahydroquinoline-3-carboxylate)

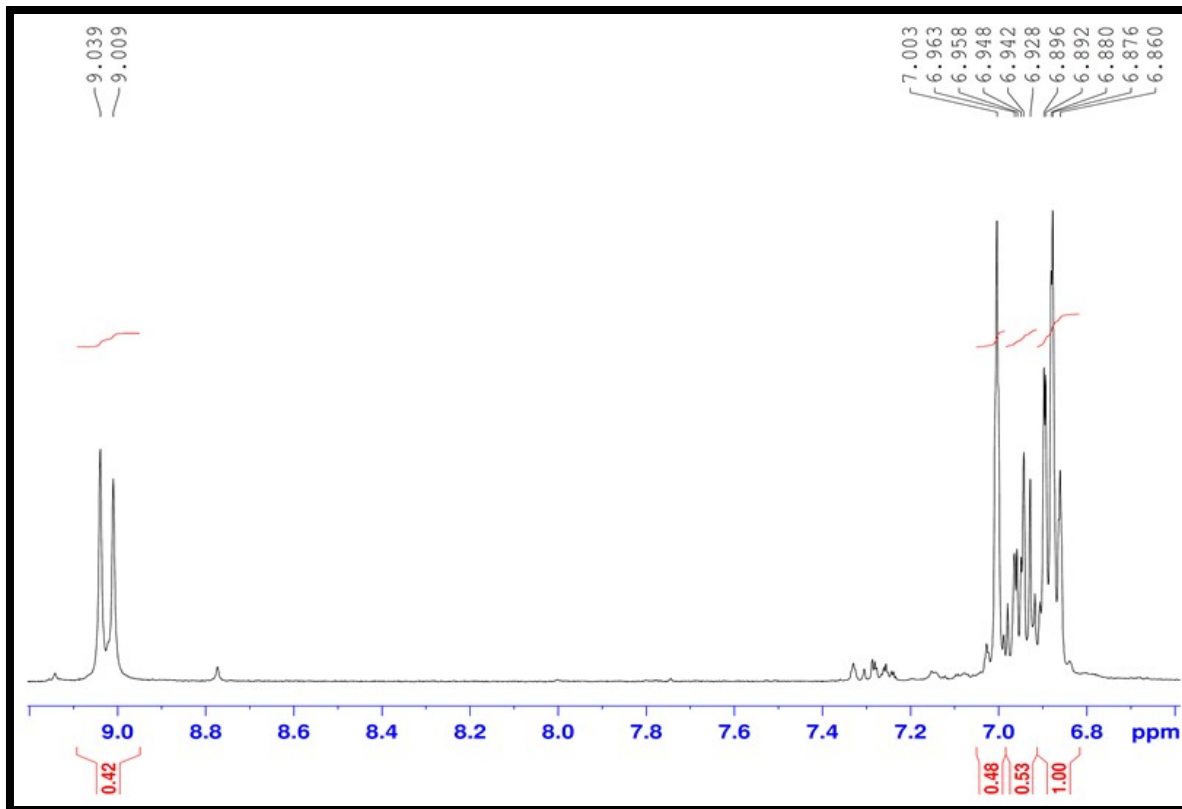

**Fig. S35.** <sup>1</sup>H NMR of diethyl 4,4'-(1,3-phenylene) bis(2,7,7-trimethyl-5-oxo-1,4,5,6,7,8-hexahydroquinoline-3-carboxylate)

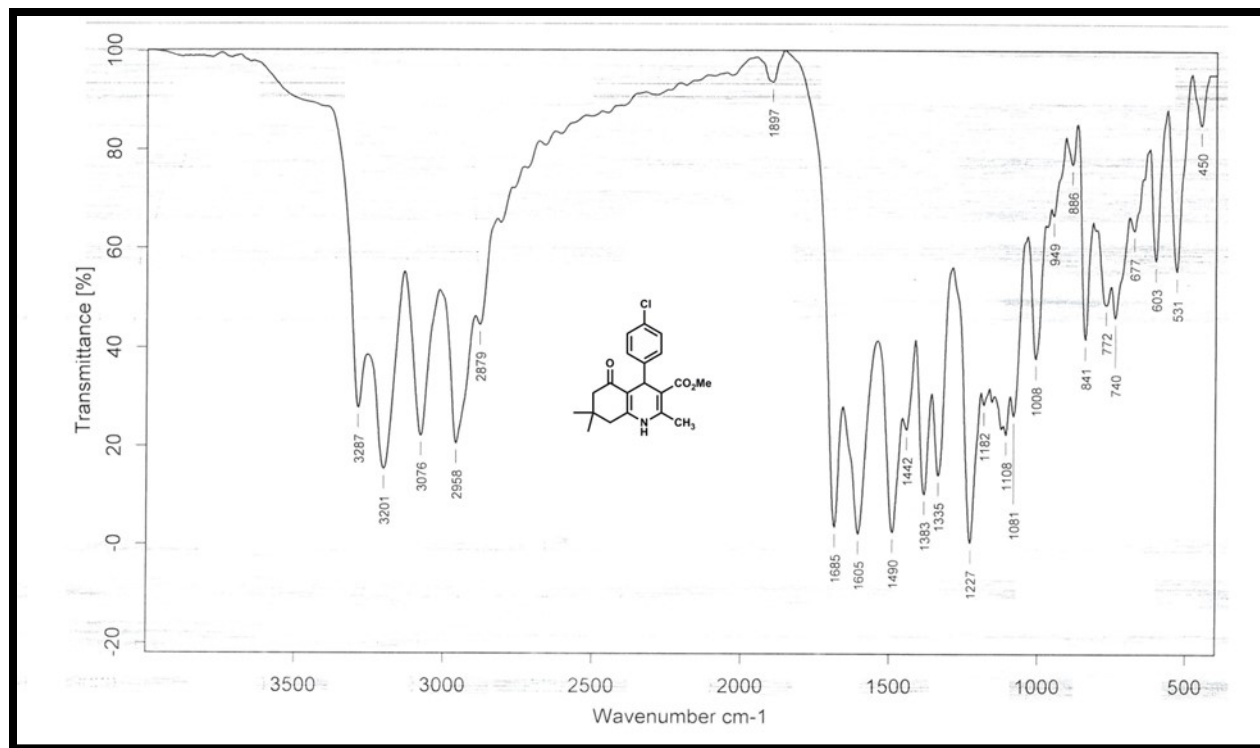

**Fig. S36.** FT-IR of methyl-4-(4-chlorophenyl)-2,7,7-trimethyl-5-oxo-1,4,5,6,7,8-hexahydroquinoline-3-carboxylate

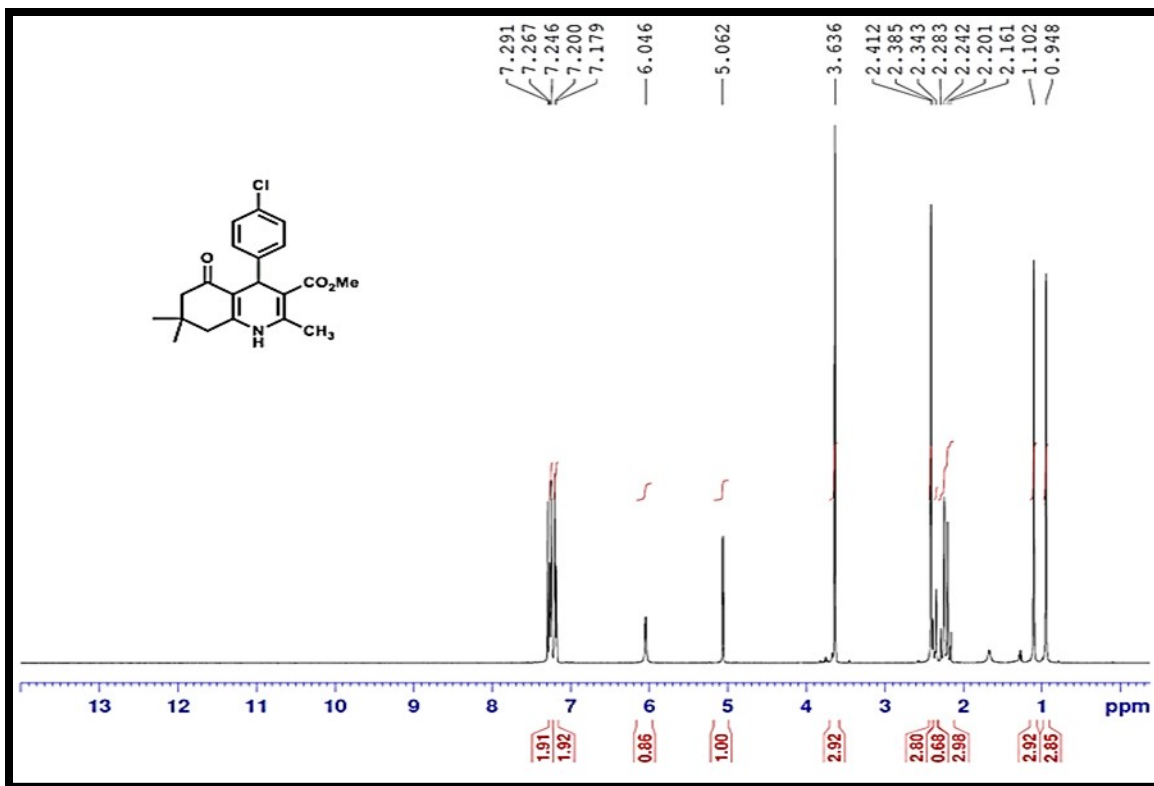

Fig. S37. <sup>1</sup>H NMR of methyl-4-(4-chlorophenyl)-2,7,7-trimethyl-5-oxo-1,4,5,6,7,8-hexahydroquinoline-3-carboxylate

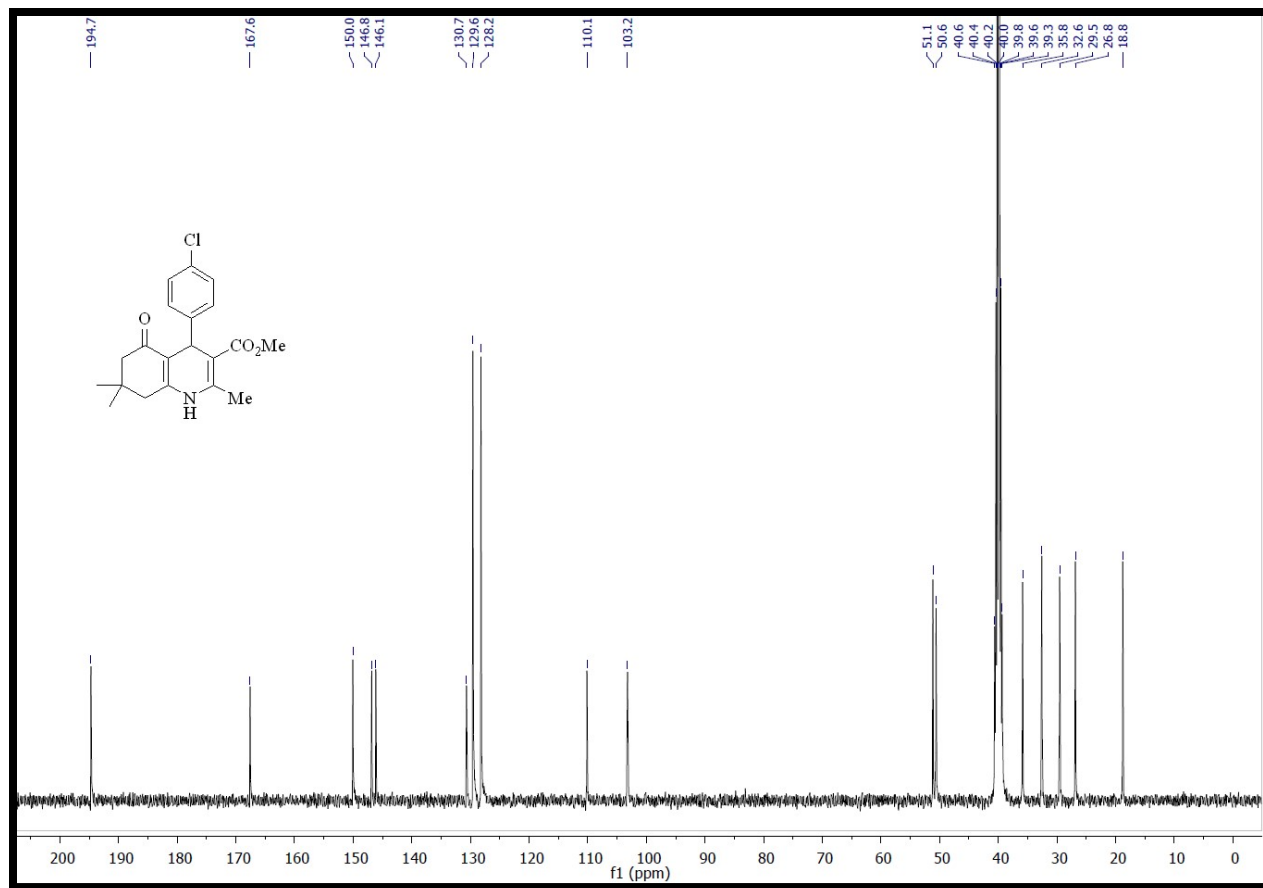

**Fig. S38.** <sup>13</sup>C NMR of methyl-4-(4-chlorophenyl)-2,7,7-trimethyl-5-oxo-1,4,5,6,7,8-hexahydroquinoline-3-carboxylate

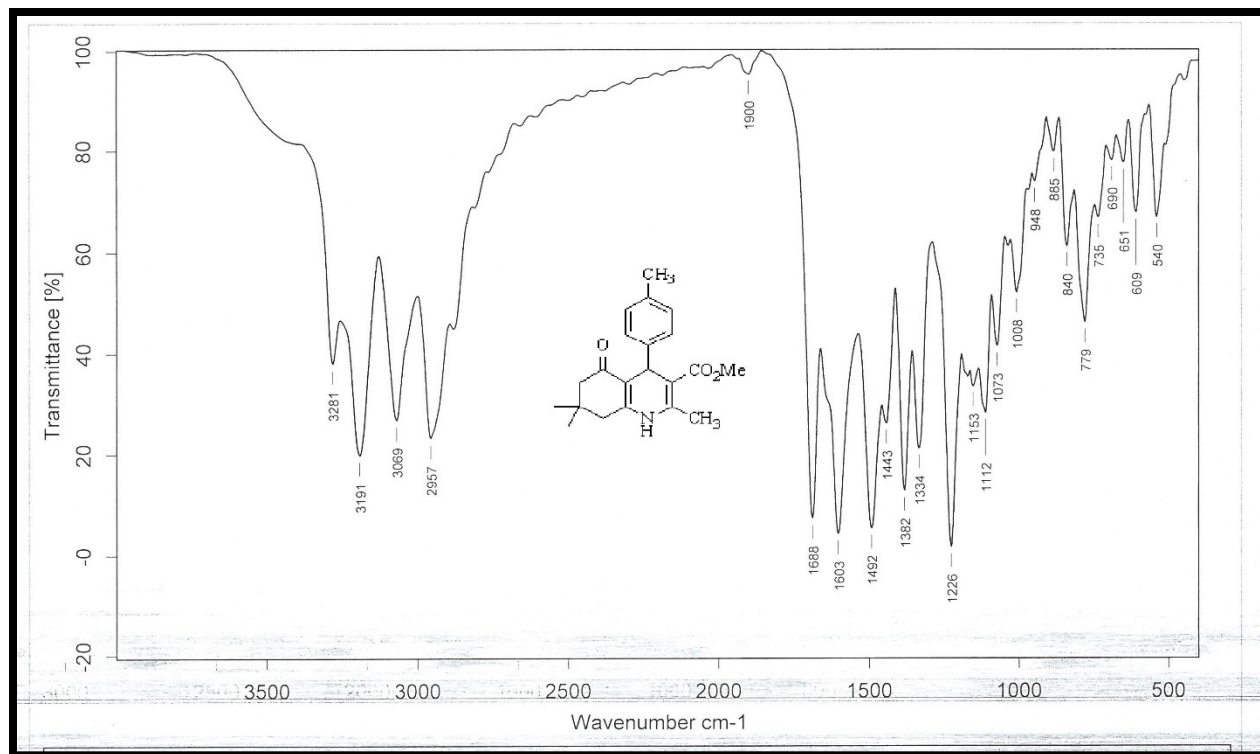

**Fig. S39.** FT-IR of methyl 2,7,7-trimethyl-5-oxo-4-(p-tolyl)-1,4,5,6,7,8-hexahydroquinoline-3-carboxylate



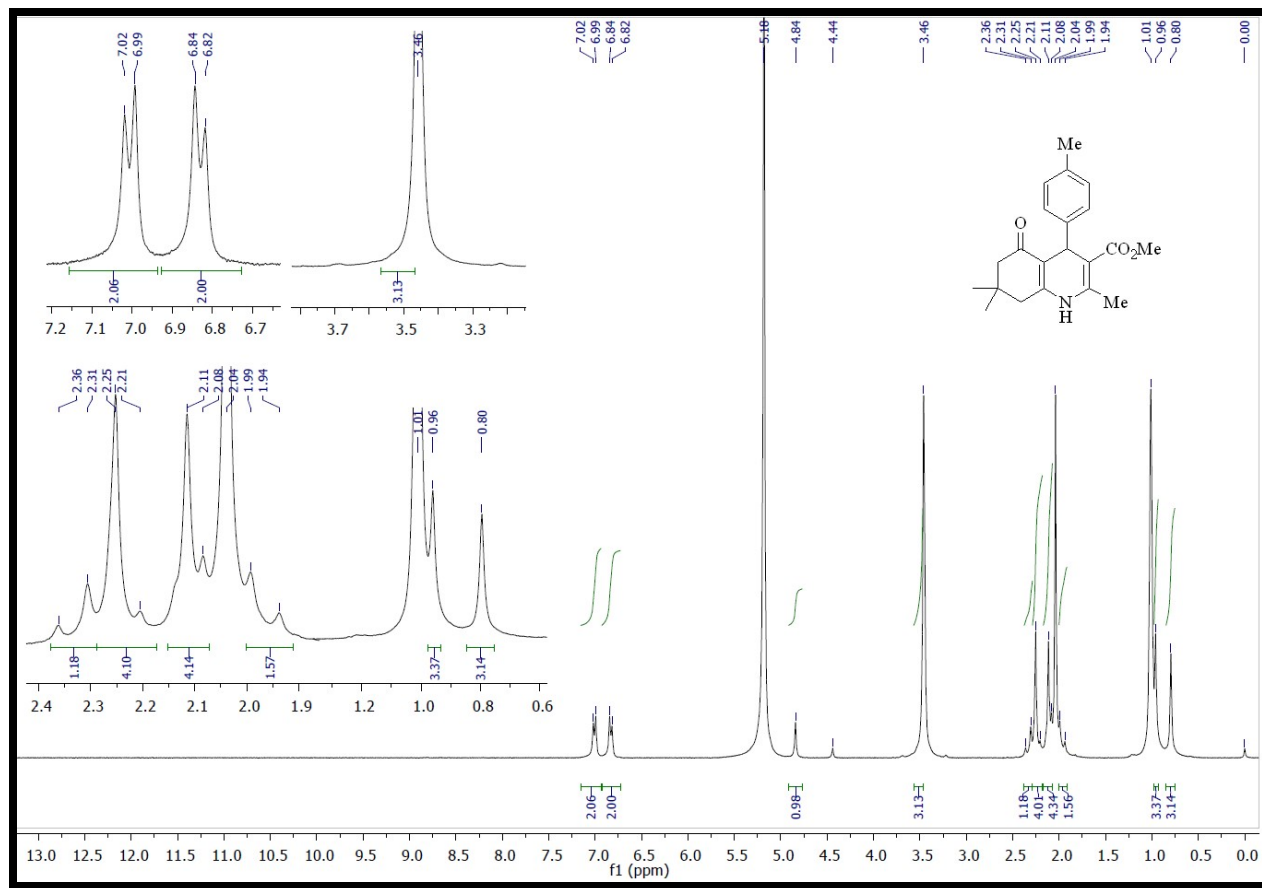

**Fig. S40.** <sup>1</sup>H NMR of methyl 2,7,7-trimethyl-5-oxo-4-(p-tolyl)-1,4,5,6,7,8-hexahydroquinoline-3-carboxylate

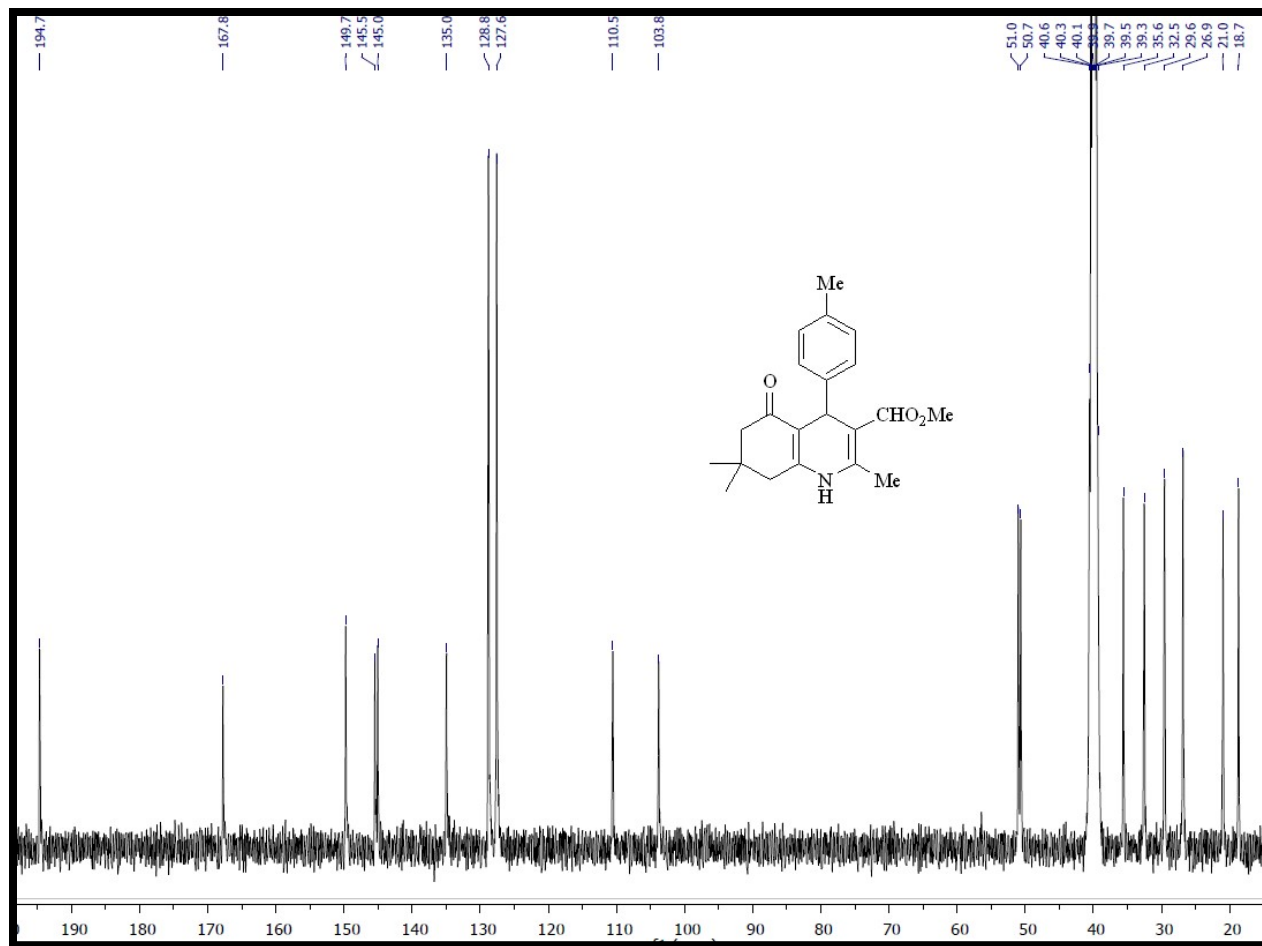

**Fig. S41.**  $^{13}\text{C}$  NMR of methyl 2,7,7-trimethyl-5-oxo-4-(p-tolyl)-1,4,5,6,7,8-hexahydroquinoline-3-carboxylate

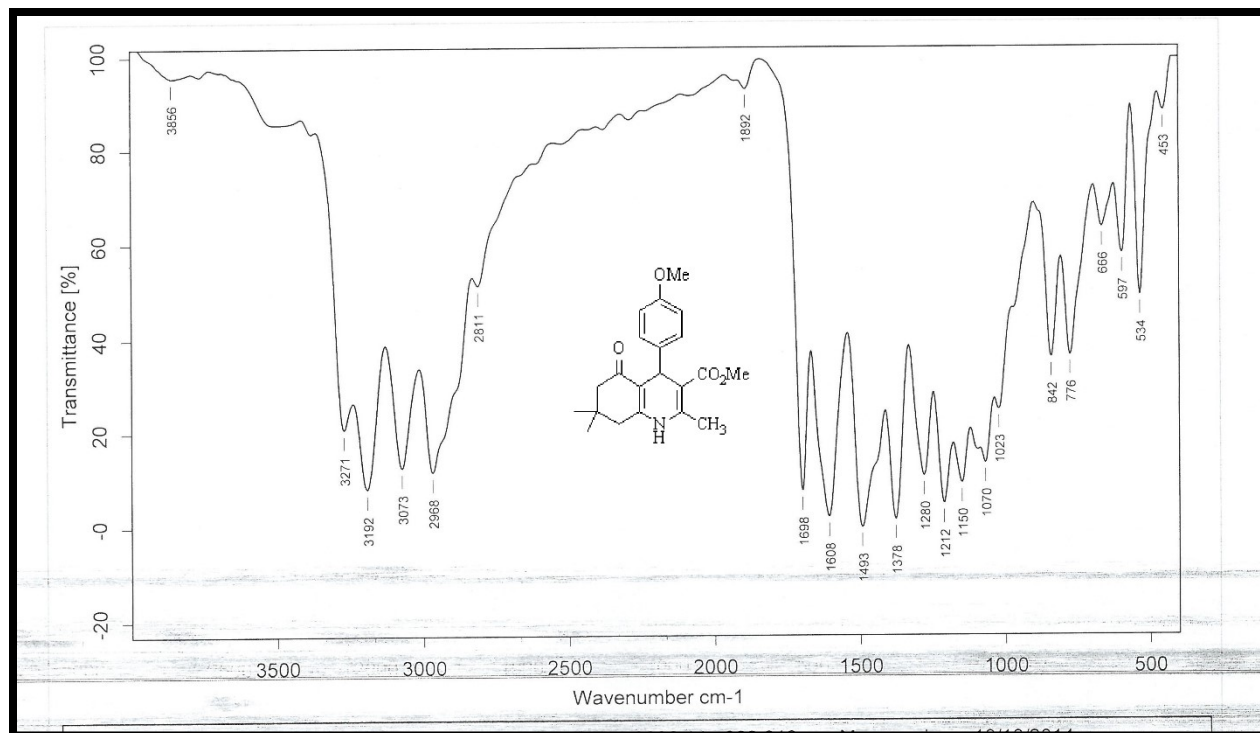

**Fig. S42.** FT-IR of methyl 4-(4-methoxyphenyl)-2,7,7-trimethyl-5-oxo-1,4,5,6,7,8-hexahydroquinoline-3-carboxylate

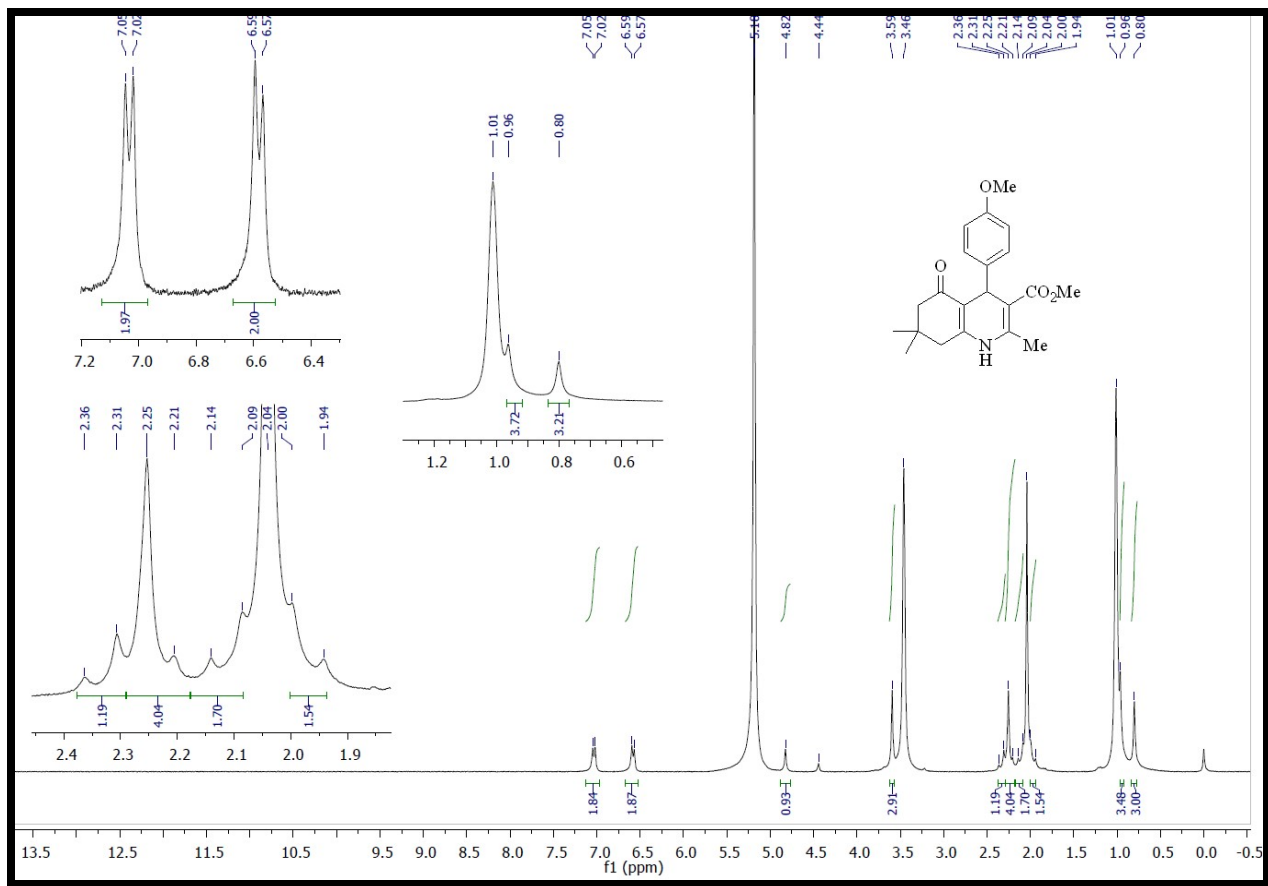

**Fig. S43.** <sup>1</sup>H NMR of methyl 4-(4-methoxyphenyl)-2,7,7-trimethyl-5-oxo-1,4,5,6,7,8-hexahydroquinoline-3-carboxylate

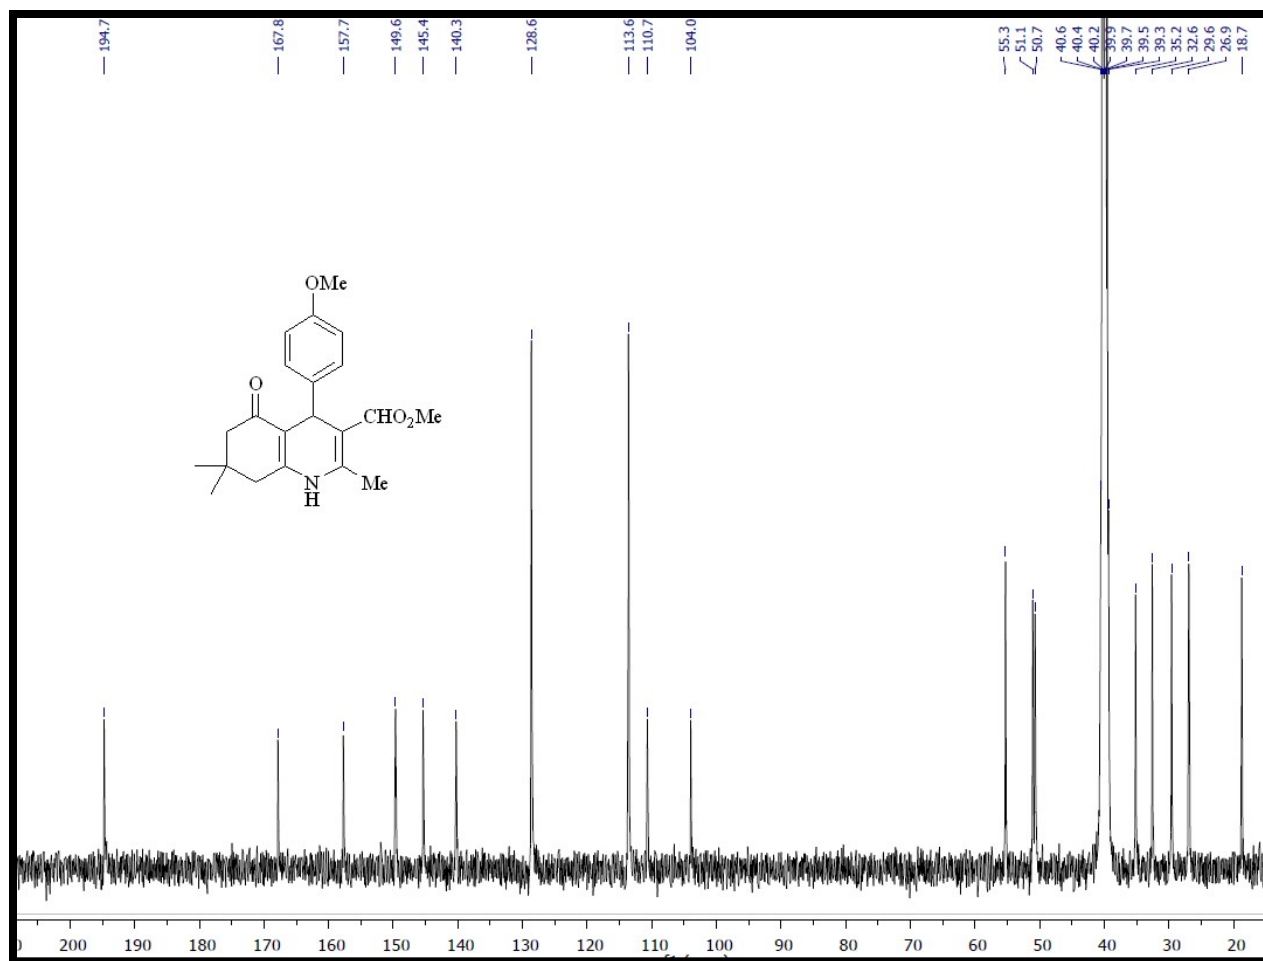

**Fig. S44.** <sup>13</sup>C NMR of methyl 4-(4-methoxyphenyl)-2,7,7-trimethyl-5-oxo-1,4,5,6,7,8-hexahydroquinoline-3-carboxylate

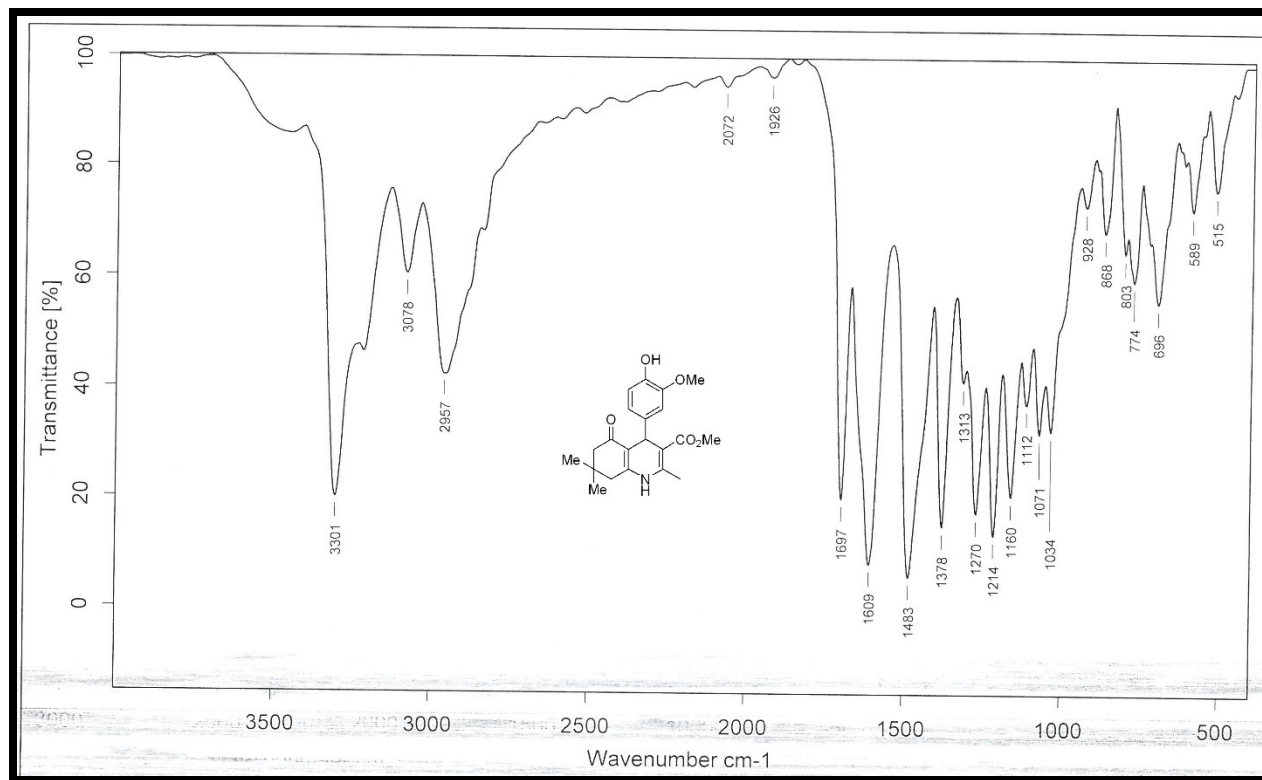

**Fig. S45.** FT-IR of methyl 4-(4-hydroxy-3-methoxyphenyl)-2,7,7-trimethyl-5-oxo-1,4,5,6,7,8-hexahydroquinoline-3-carboxylate

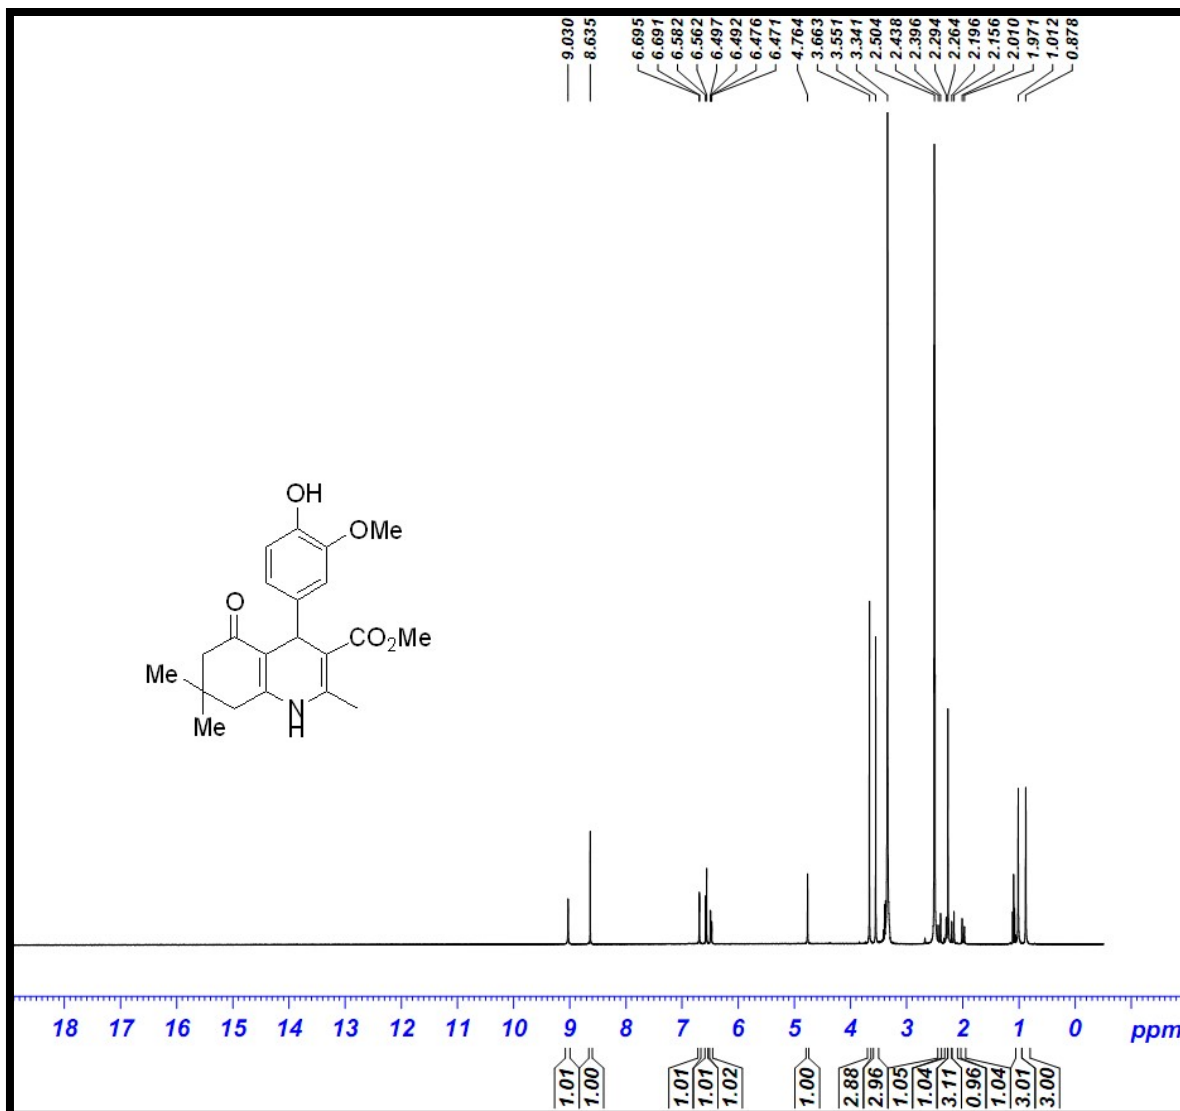

**Fig. S46.** <sup>1</sup>H NMR of methyl 4-(4-hydroxy-3-methoxyphenyl)-2,7,7-trimethyl-5-oxo-1,4,5,6,7,8-hexahydroquinoline-3-carboxylate

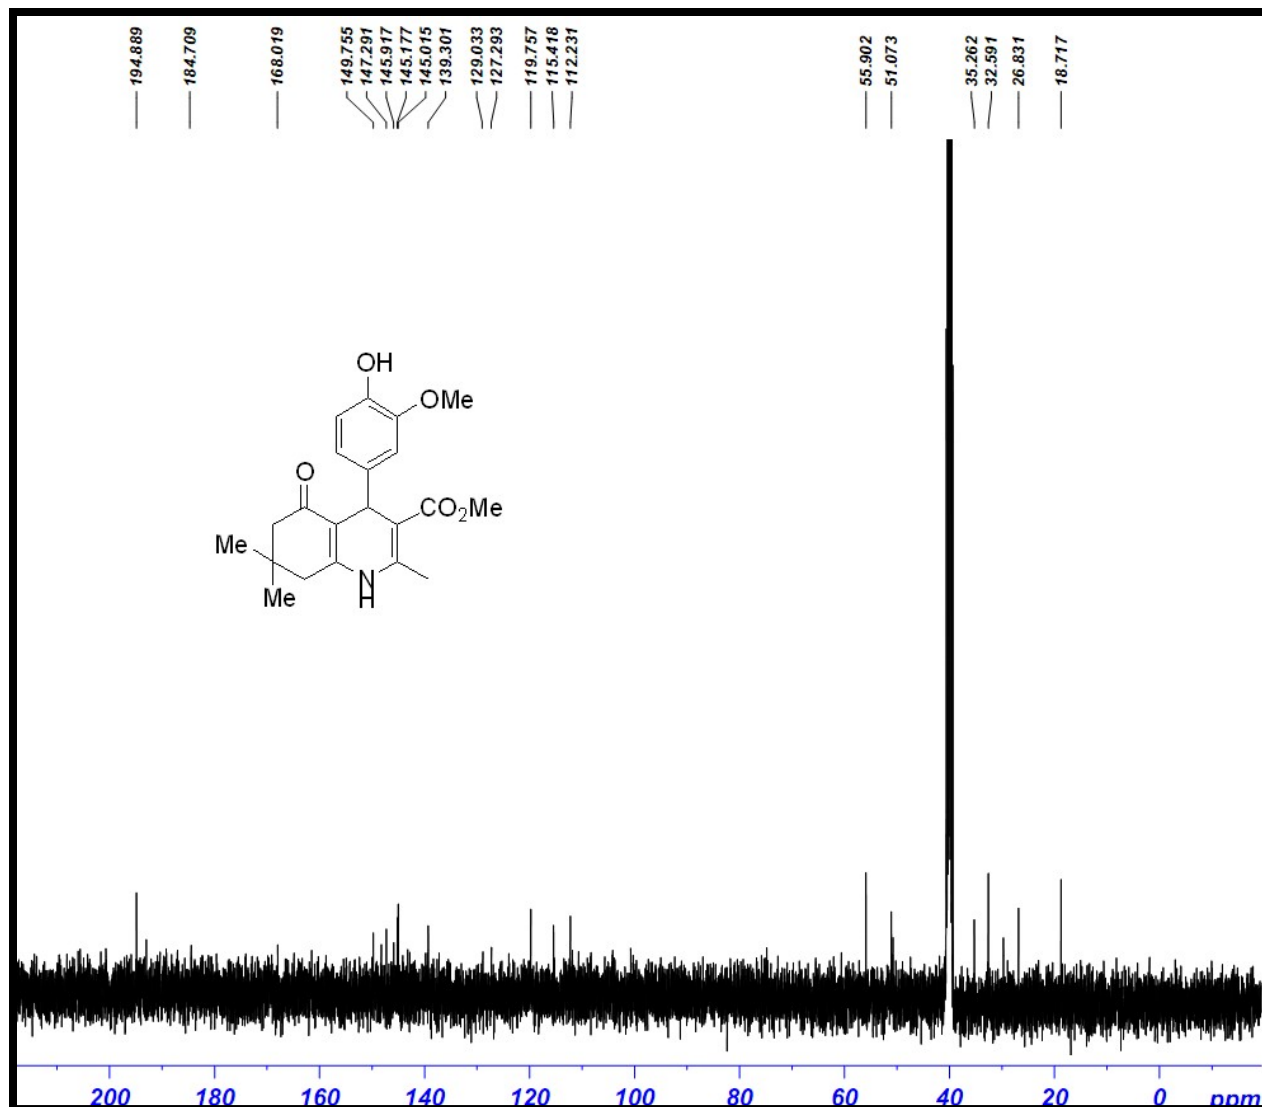

**Fig. S47.** The <sup>13</sup>C NMR of methyl 4-(4-hydroxy-3-methoxyphenyl)-2,7,7-trimethyl-5-oxo-1,4,5,6,7,8-hexahydroquinoline-3-carboxylate



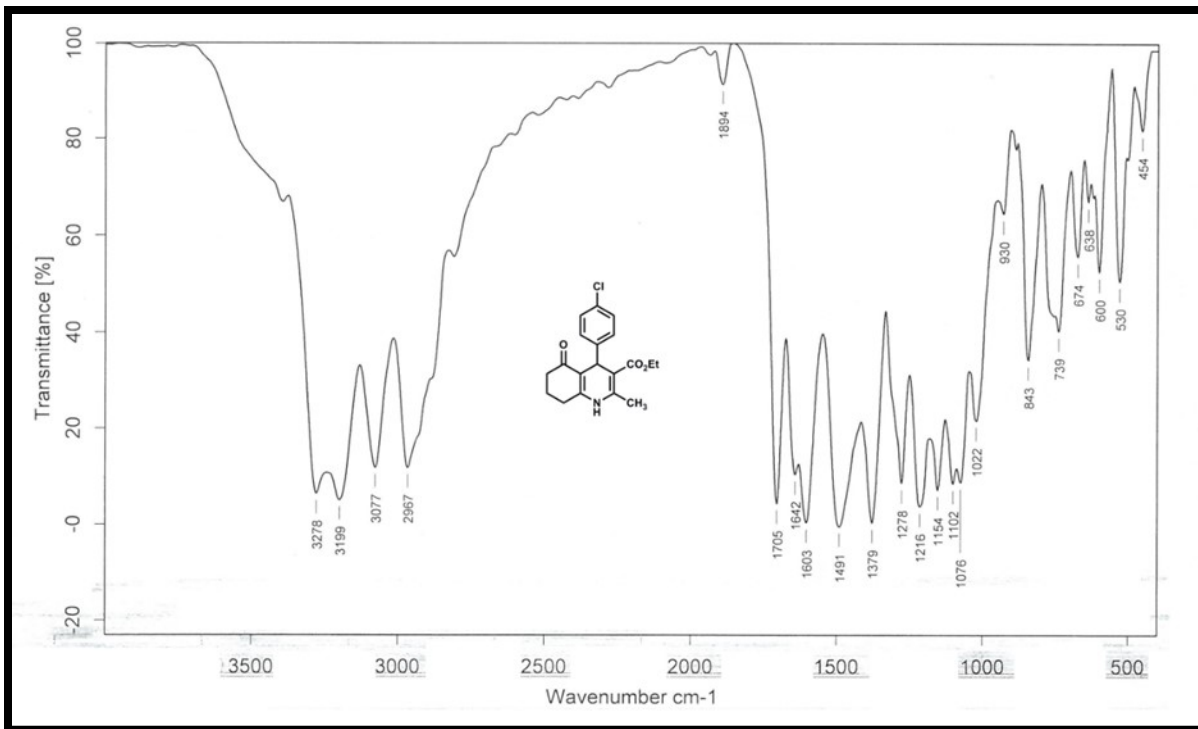

**Fig. S48.** FT-IR of ethyl 4-(4-chlorophenyl)-2-methyl-5-oxo-1,4,5,6,7,8-hexahydroquinoline-3-carboxylate

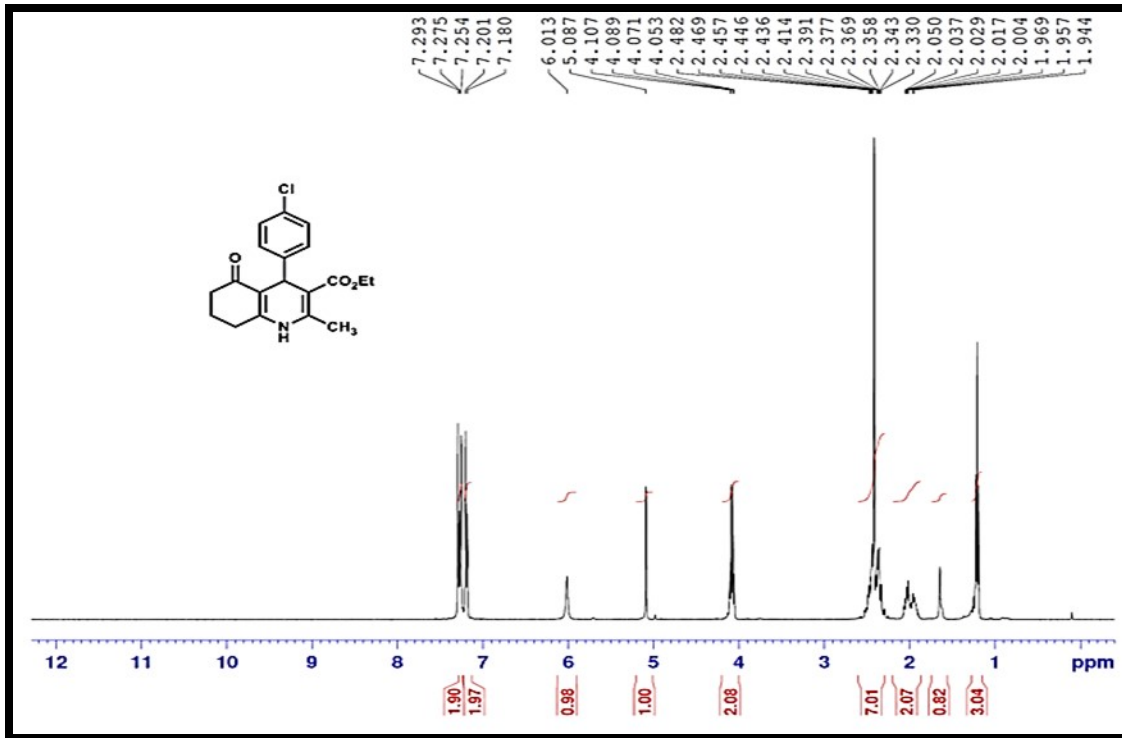

**Fig. S49.** <sup>1</sup>H NMR of ethyl 4-(4-chlorophenyl)-2-methyl-5-oxo-1,4,5,6,7,8-hexahydroquinoline-3-carboxylate

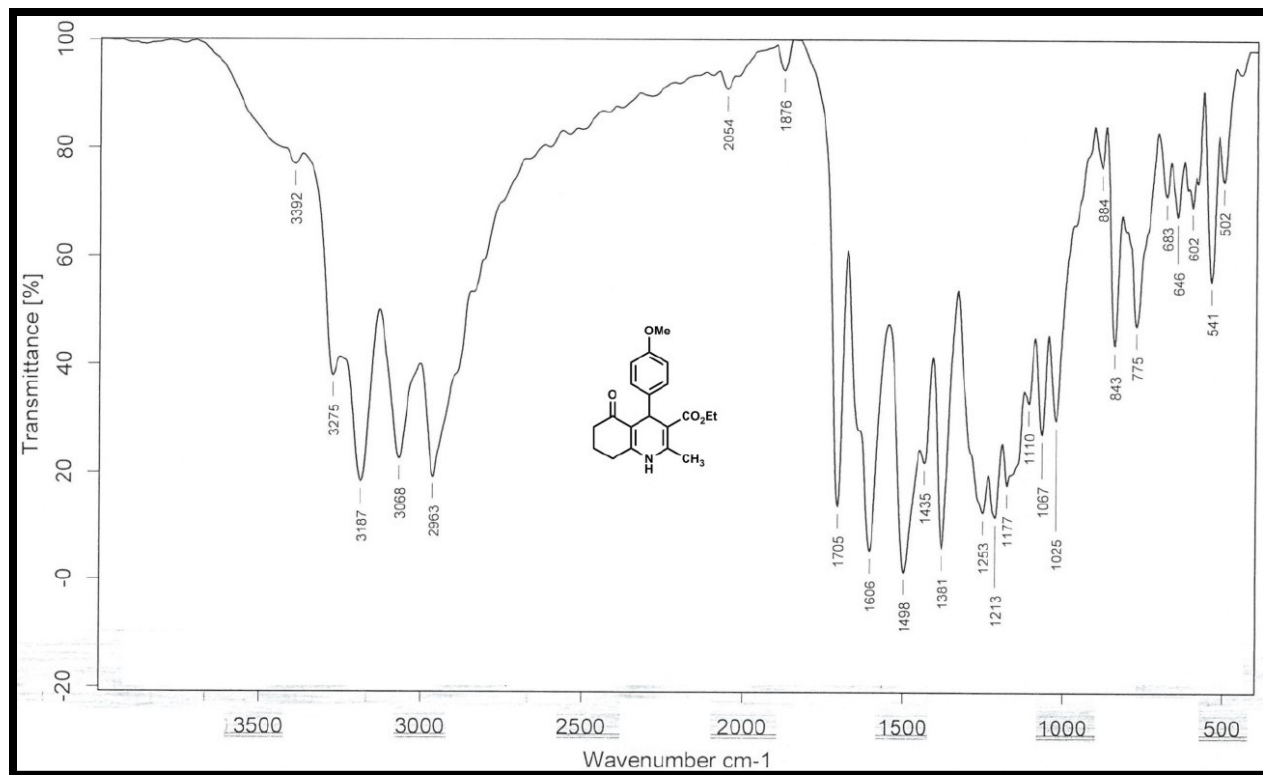

**Fig. S50.** FT-IR of ethyl 4-(4-methoxyphenyl)-2-methyl-5-oxo-1,4,5,6,7,8-hexahydroquinoline-3-carboxylate

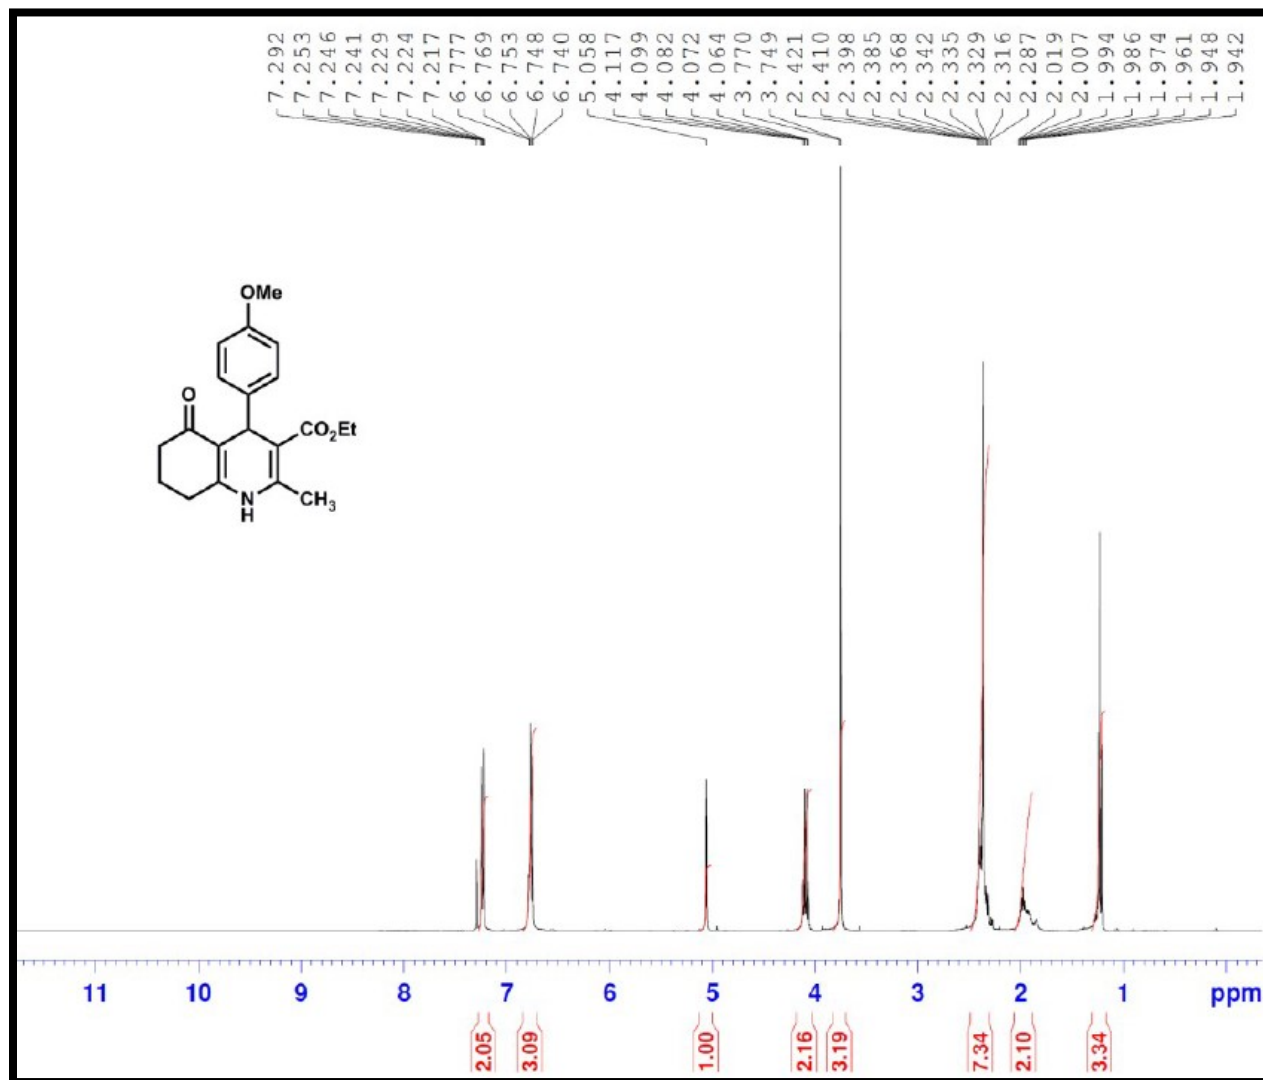

**Fig. S51.** <sup>1</sup>H NMR of ethyl 4-(4-methoxyphenyl)-2-methyl-5-oxo-1,4,5,6,7,8-hexahydroquinoline-3-carboxylate

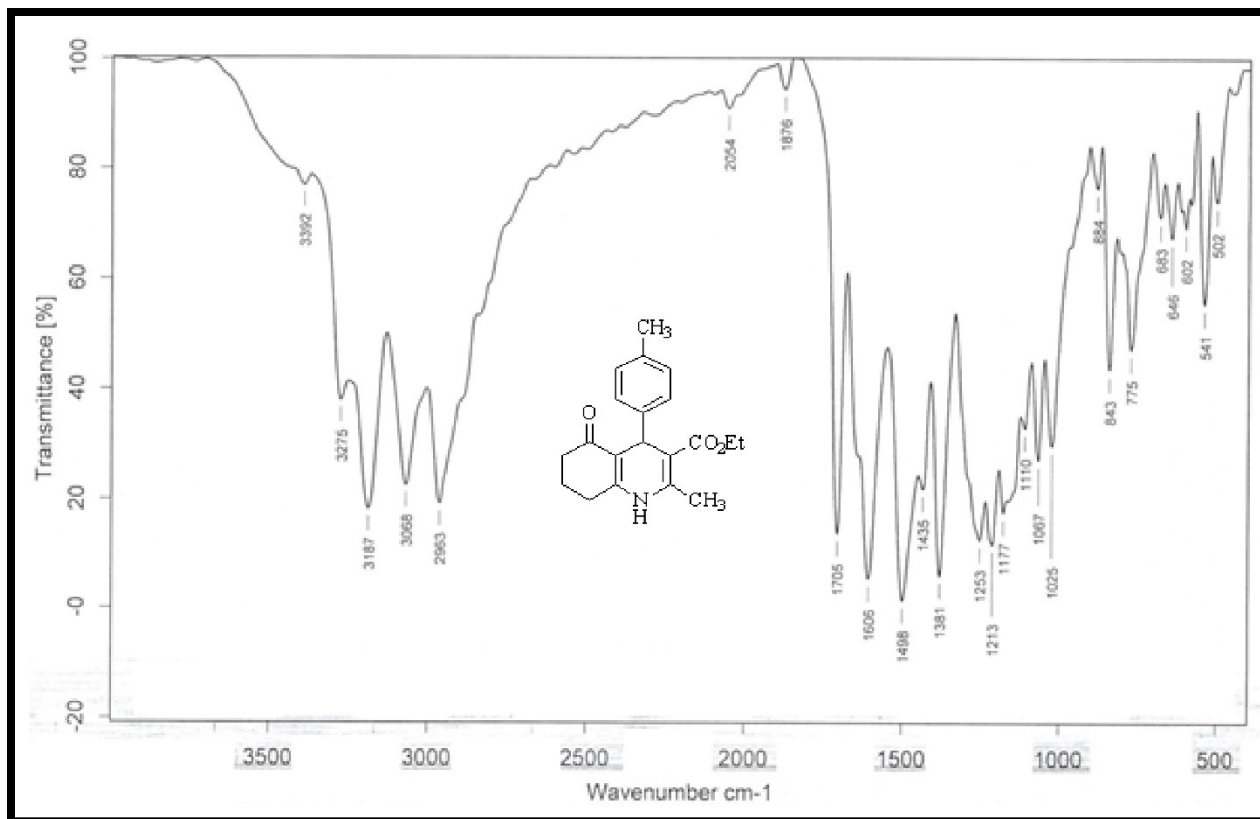

Fig. S52. FT-IR of ethyl 2-methyl-5-oxo-4-(p-tolyl)-1,4,5,6,7,8-hexahydroquinoline-3-carboxylate

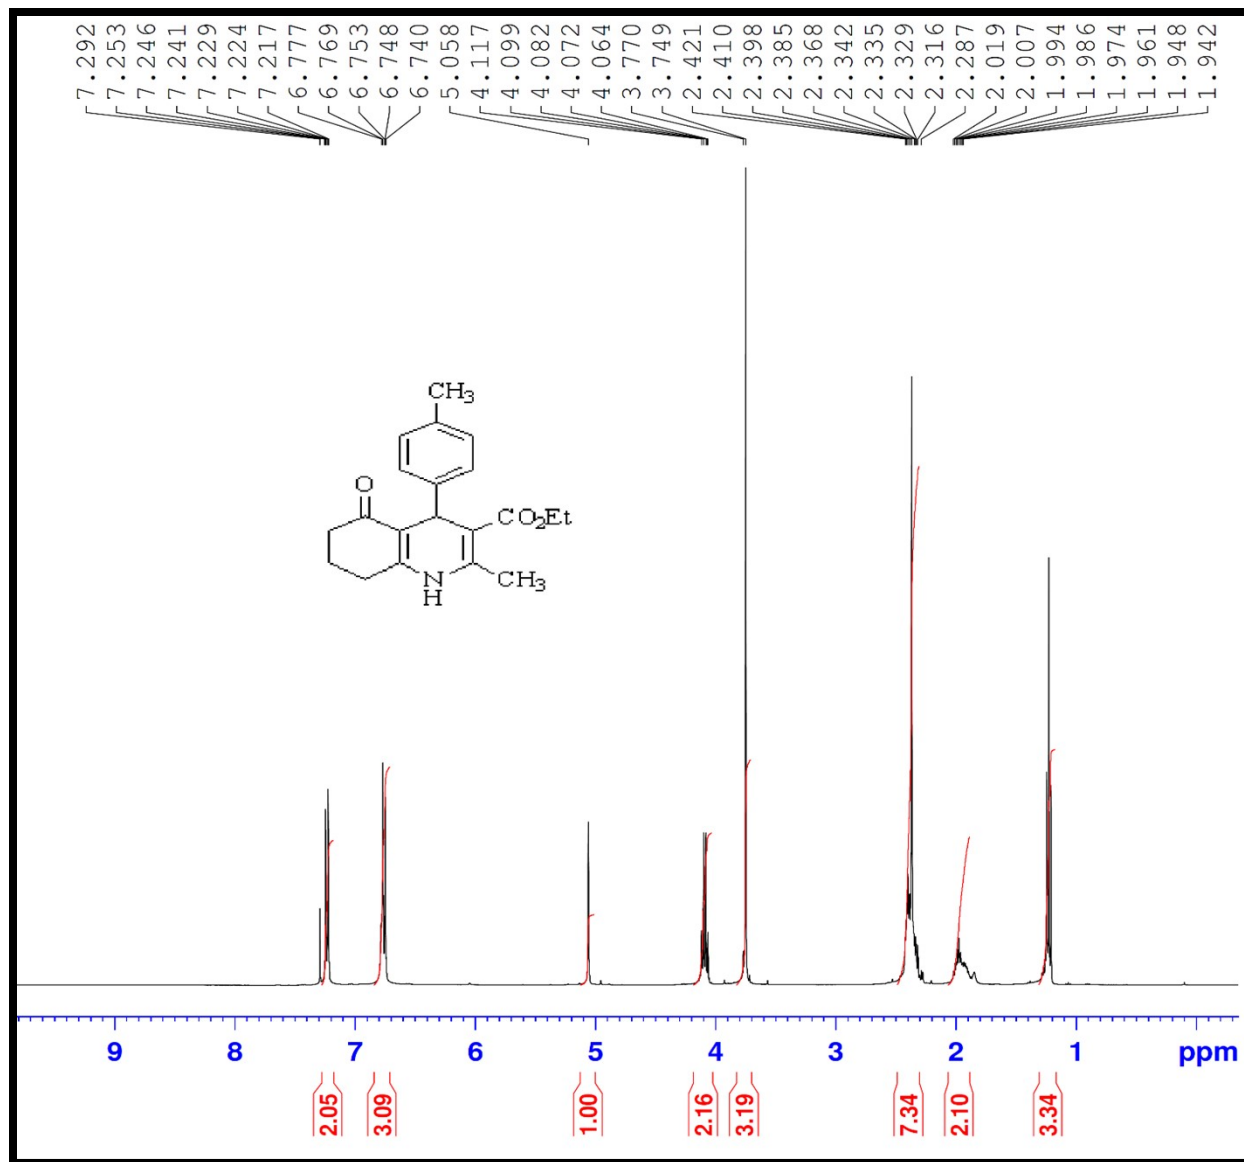

Fig. S53. <sup>1</sup>H NMR of ethyl 2-methyl-5-oxo-4-(p-tolyl)-1,4,5,6,7,8-hexahydroquinoline-3-carboxylate

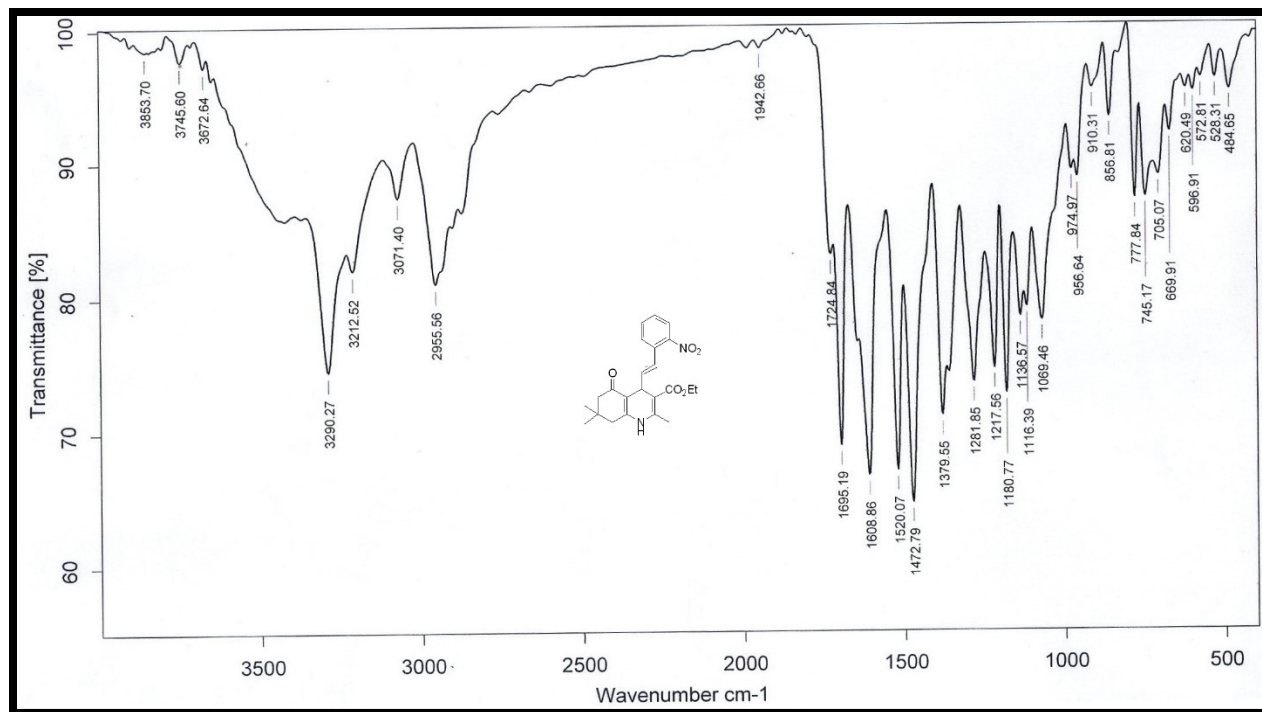

**Fig. S54.** FT-IR of ethyl (E)-2-methyl-4-(2-nitrostyryl)-5-oxo-1,4,5,6,7,8-hexahydroquinoline-3-carboxylate

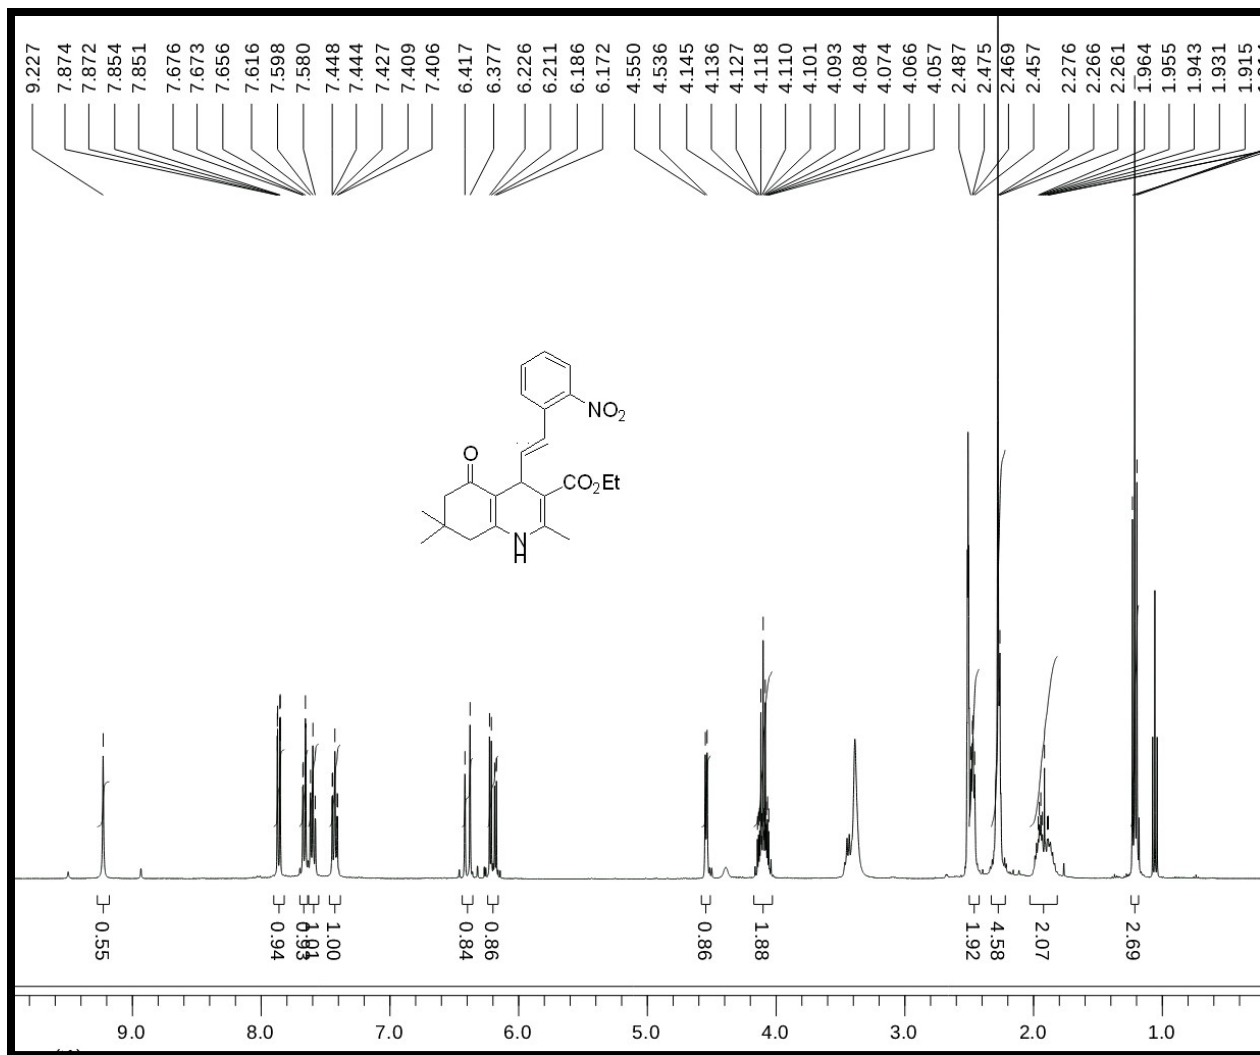

**Fig. S55.** <sup>1</sup>H NMR of ethyl (E)-2-methyl-4-(2-nitrostyryl)-5-oxo-1,4,5,6,7,8-hexahydroquinoline-3-carboxylate



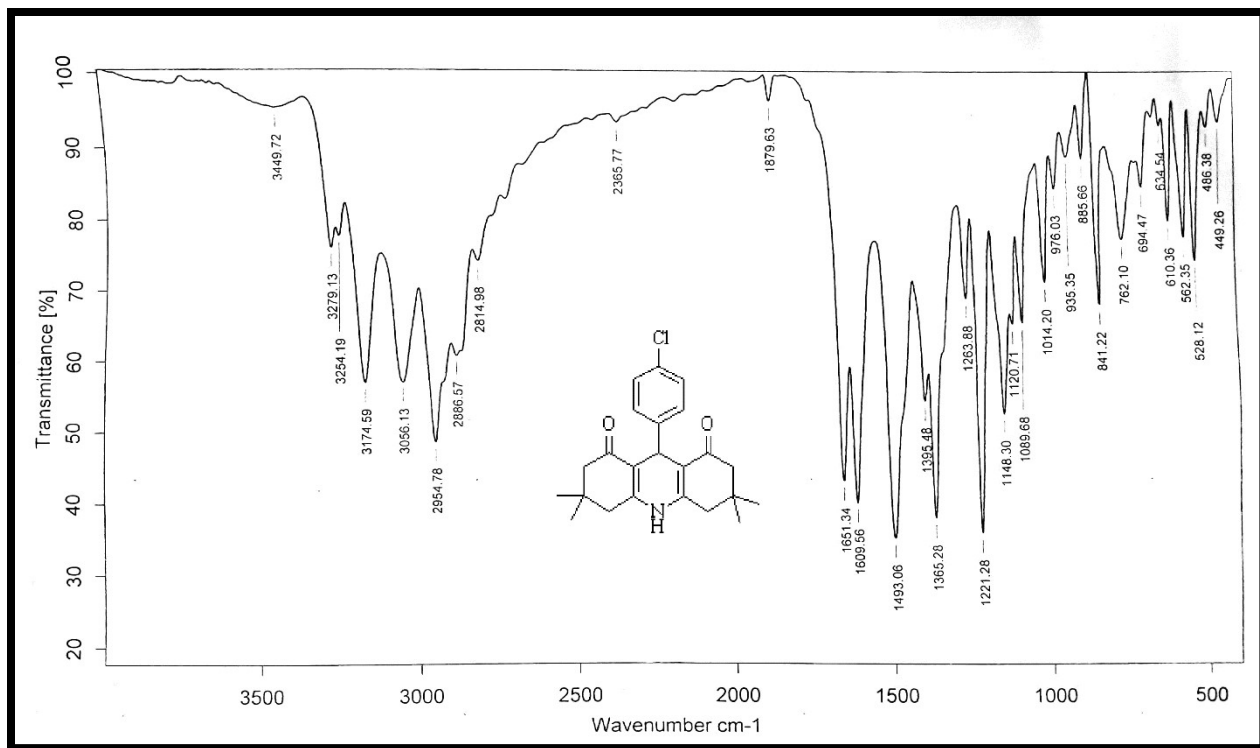

**Fig. S56.** FT-IR of 9-(4-chlorophenyl)-3,3,6,6-tetramethyl-3,4,6,7,9,10-hexahydroacridine-1,8(2H,5H)-dione

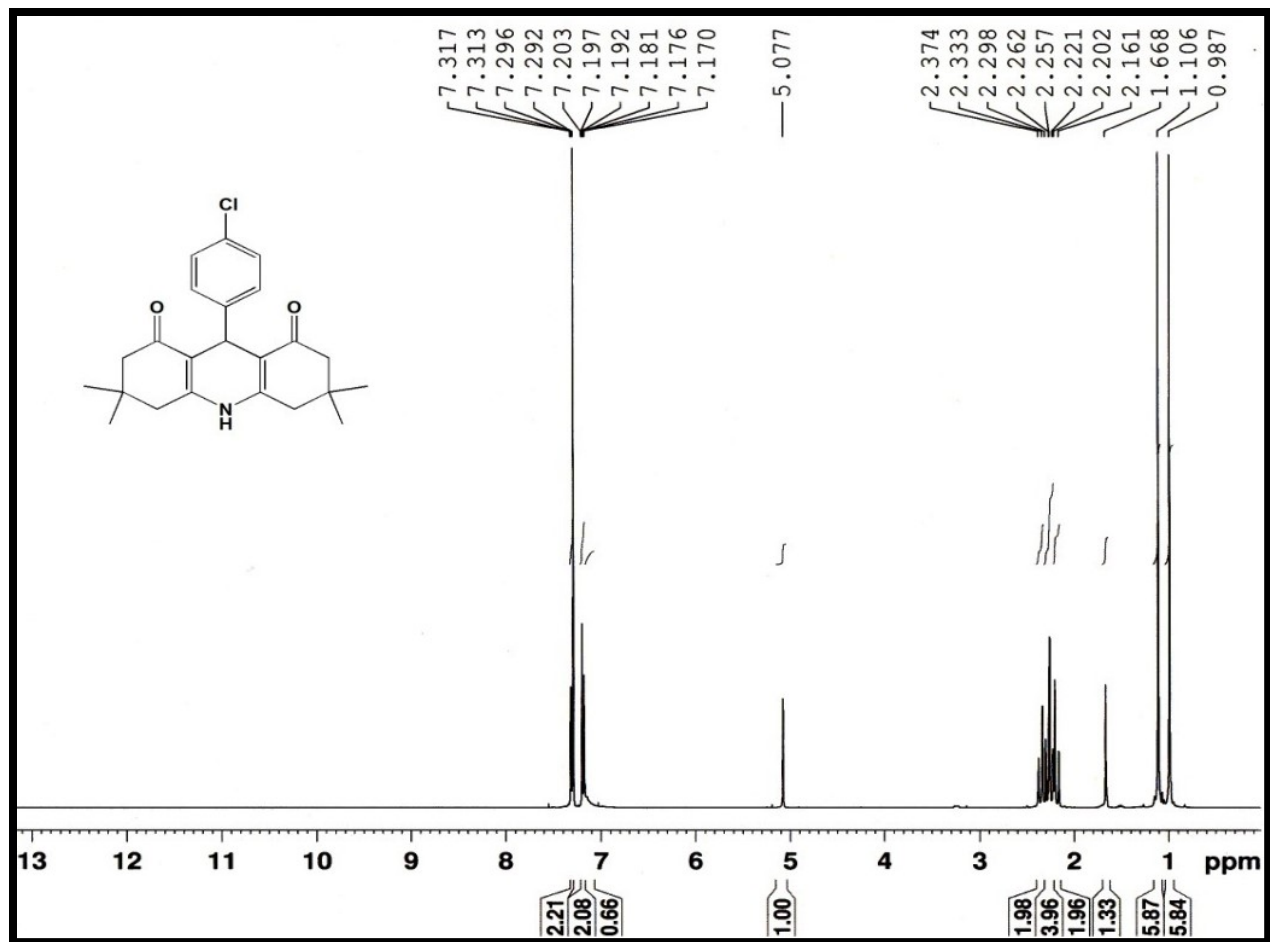

Fig. S57.  $^1\text{H}$  NMR of 9-(4-chlorophenyl)-3,3,6,6-tetramethyl-3,4,6,7,9,10-hexahydroacridine-1,8(2H,5H)-dione

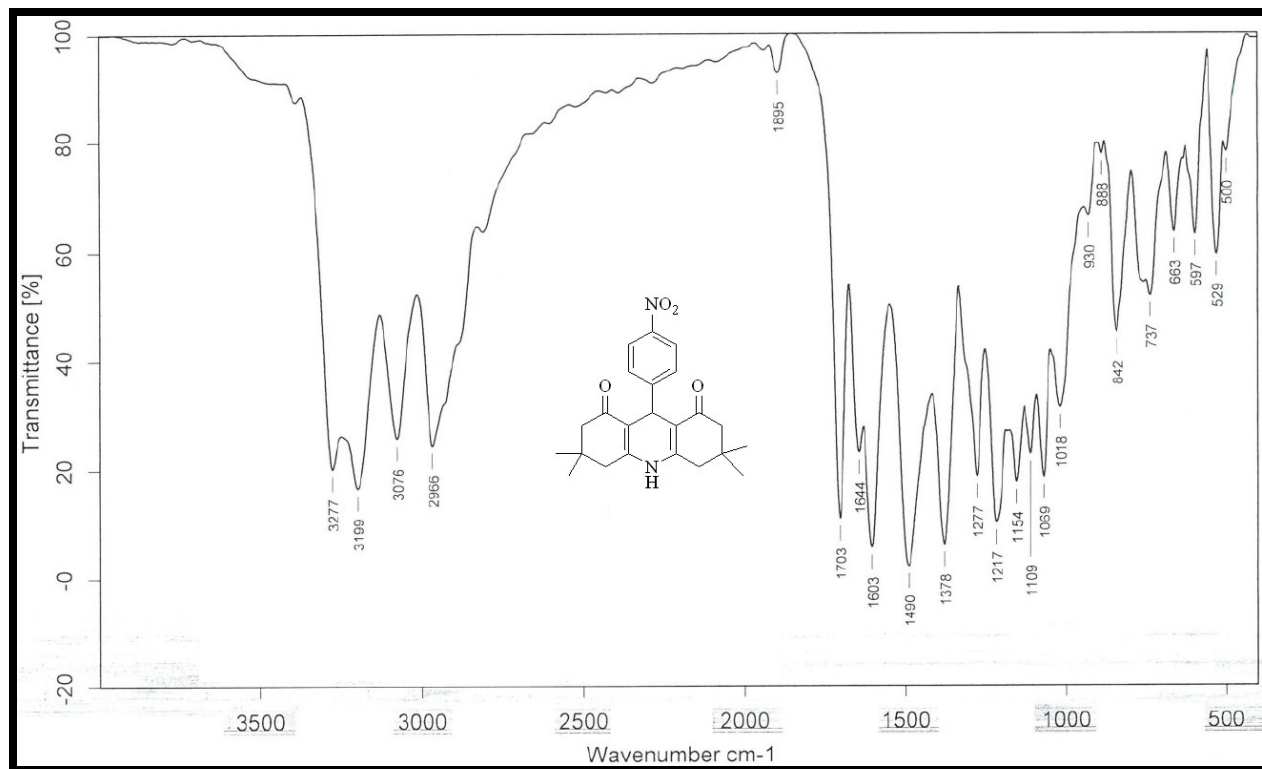

**Fig. S58.** FT-IR of 3,3,6,6-tetramethyl-9-(4-nitrophenyl)-3,4,6,7,9,10-hexahydroacridine-1,8(2H,5H)-dione

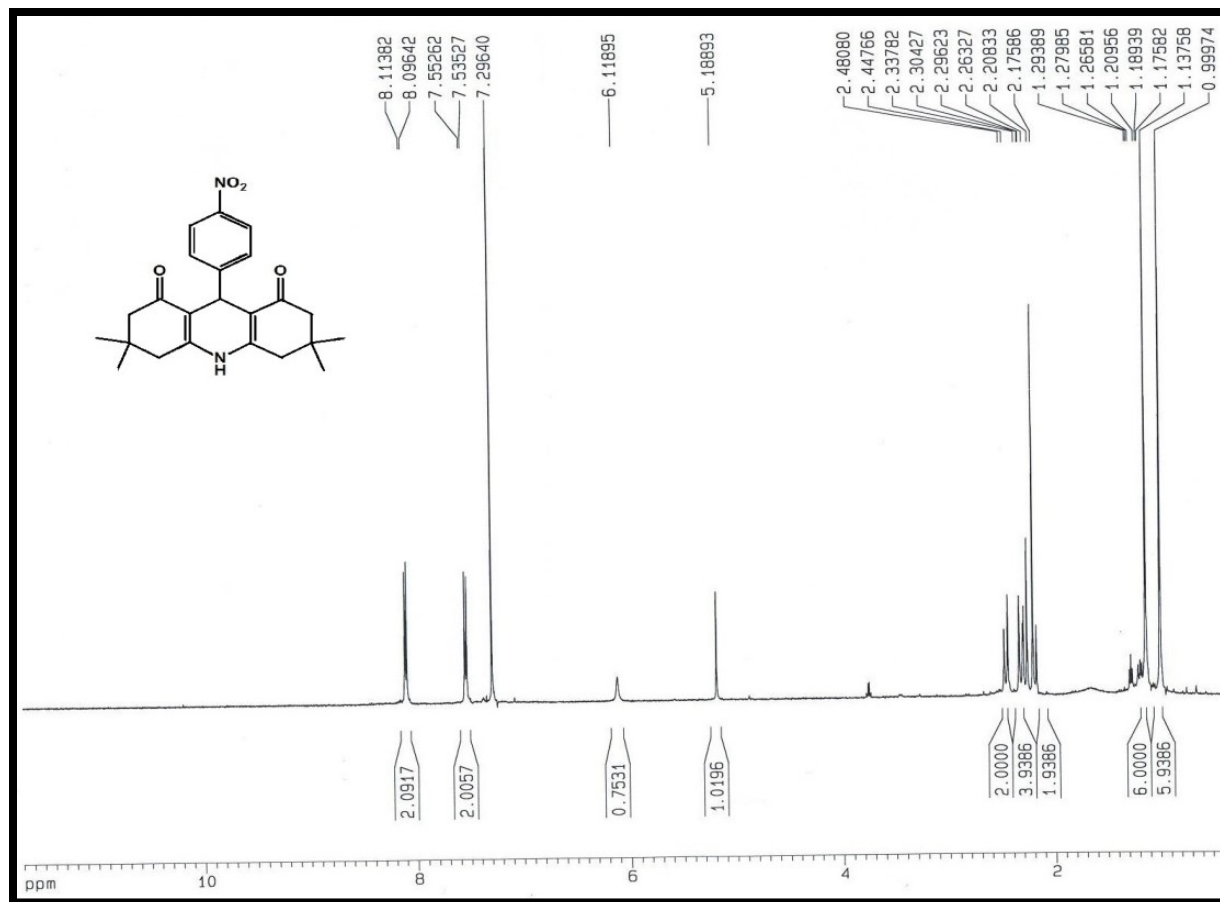

**Fig. S59.** <sup>1</sup>H NMR of 3,3,6,6-tetramethyl-9-(4-nitrophenyl)-3,4,6,7,9,10-hexahydroacridine-1,8(2H,5H)-dione

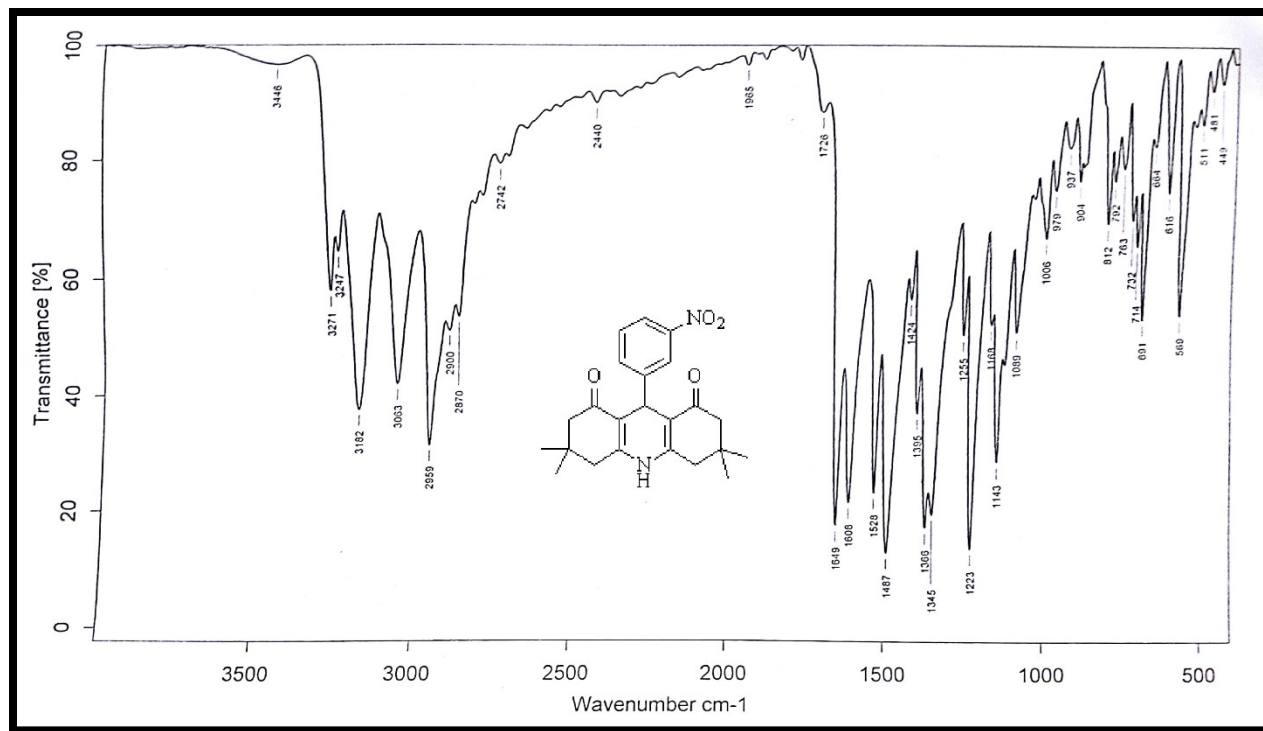

**Fig. S60.** FT-IR of 3,3,6,6-tetramethyl-9-(3-nitrophenyl)-3,4,6,7,9,10-hexahydroacridine-1,8(2H,5H)-dione

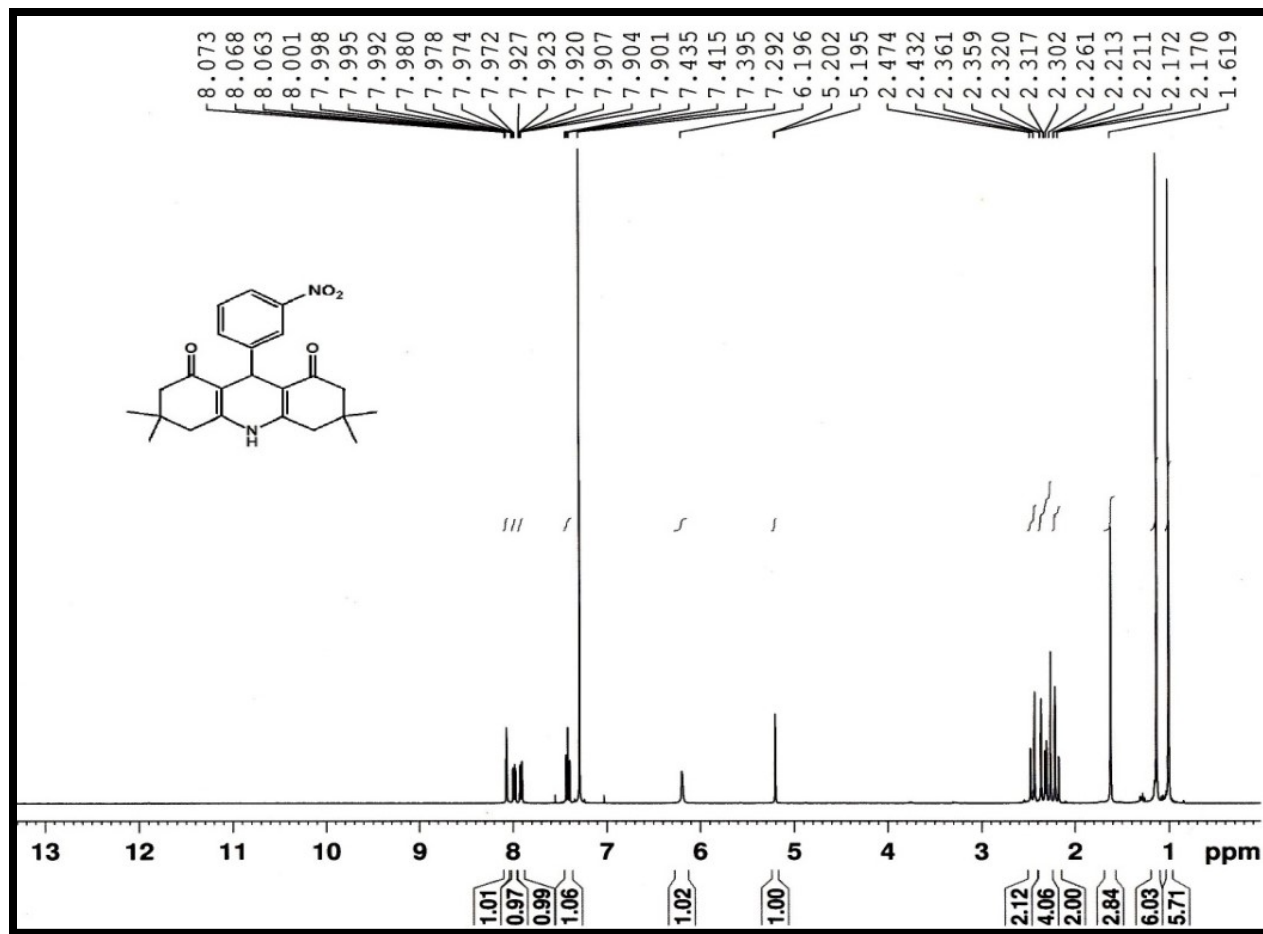

**Fig. S61.** <sup>1</sup>H NMR of 3,3,6,6-tetramethyl-9-(3-nitrophenyl)-3,4,6,7,9,10-hexahydroacridine-1,8(2H,5H)-dione

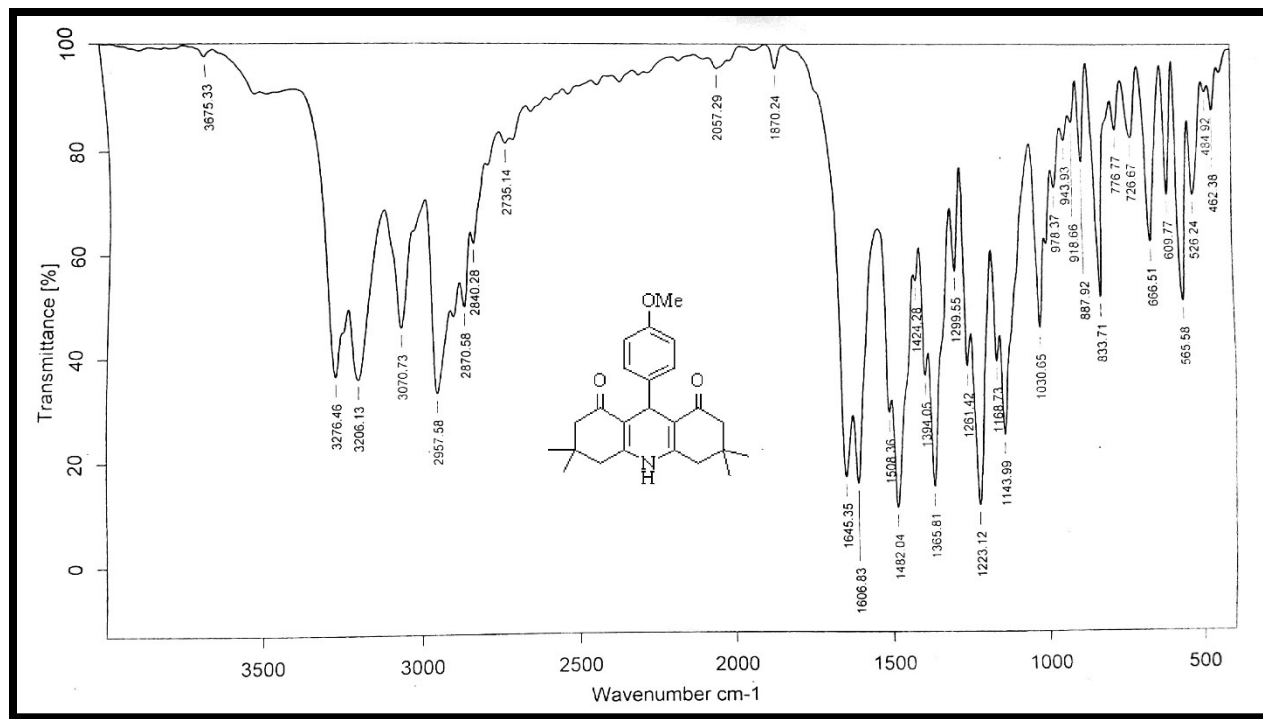

**Fig. S62.** FT-IR of 9-(4-methoxyphenyl)-3,3,6,6-tetramethyl-3,4,6,7,9,10-hexahydroacridine-1,8(2H,5H)-dione

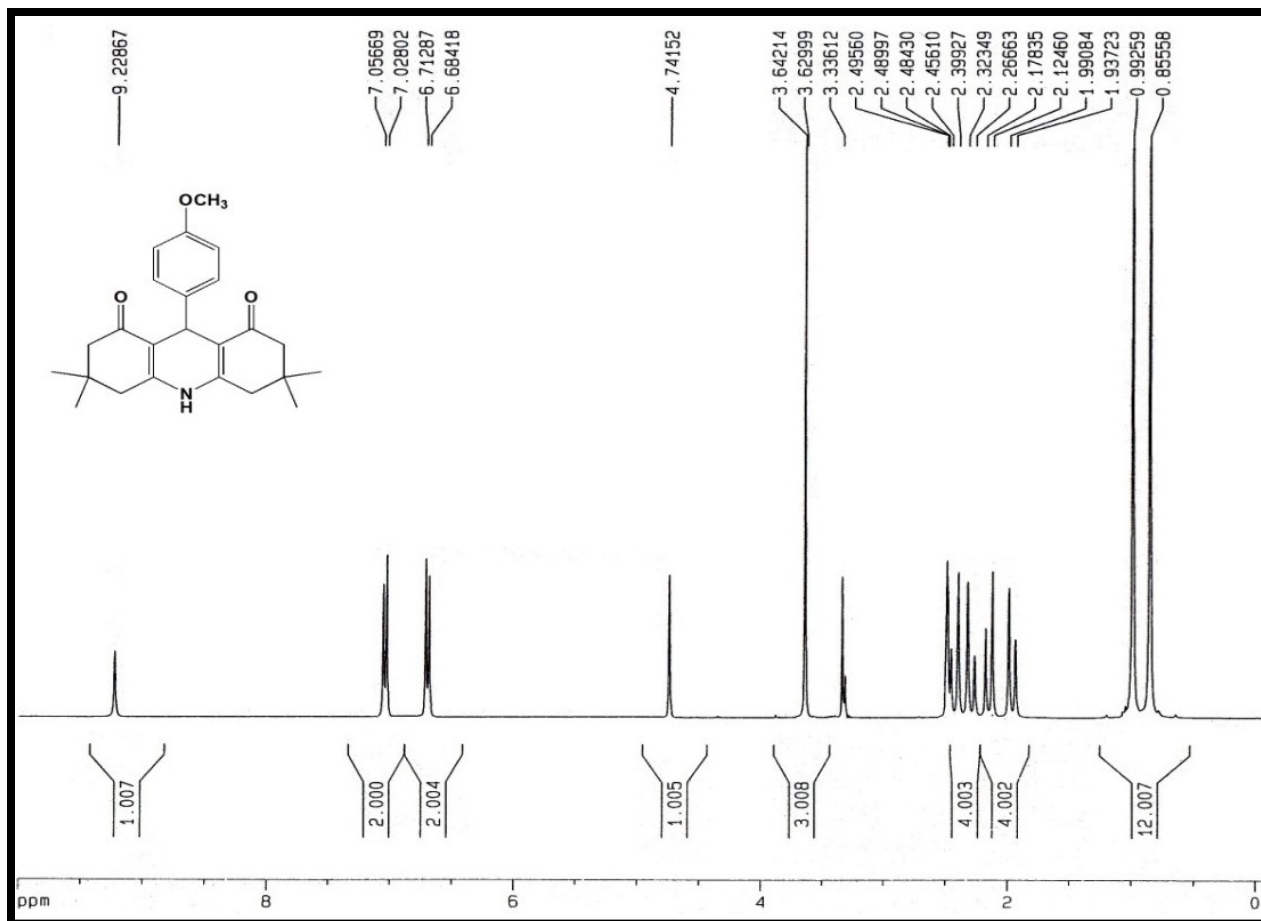

**Fig. S63.** <sup>1</sup>H NMR of 9-(4-methoxyphenyl)-3,3,6,6-tetramethyl-3,4,6,7,9,10-hexahydroacridine-1,8(2H,5H)-dione



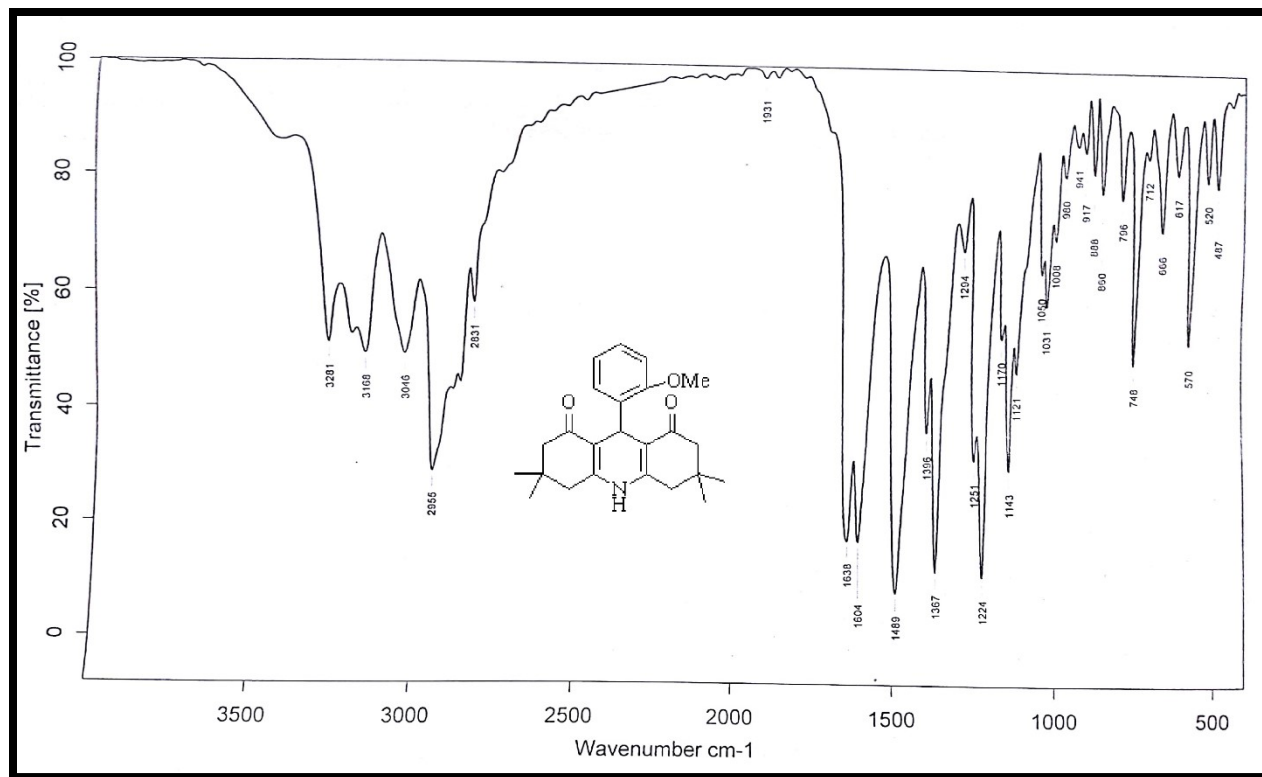

**Fig. S64.** FT-IR of 9-(2-methoxyphenyl)-3,3,6,6-tetramethyl-3,4,6,7,9,10-hexahydroacridine-1,8(2H,5H)-dione

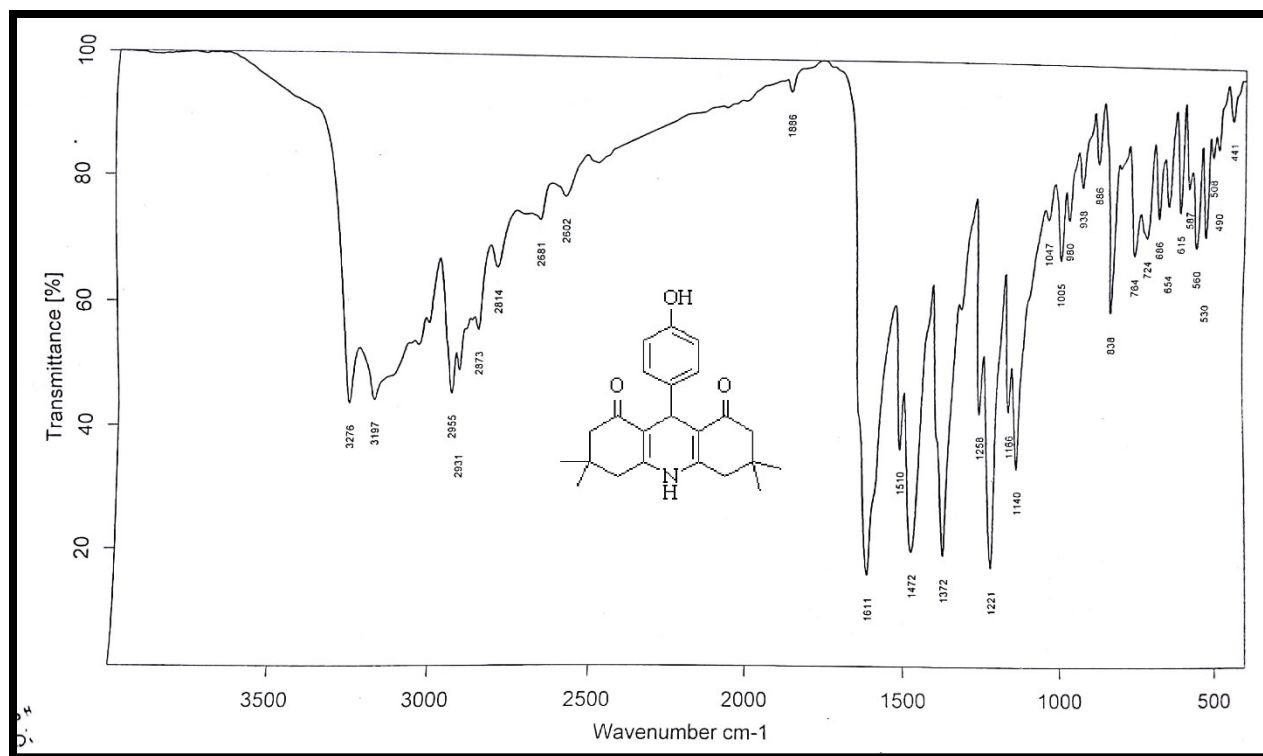

**Fig. S65.** FT-IR of 9-(4-hydroxyphenyl)-3,3,6,6-tetramethyl-3,4,6,7,9,10-hexahydroacridine-1,8(2H,5H)-dione

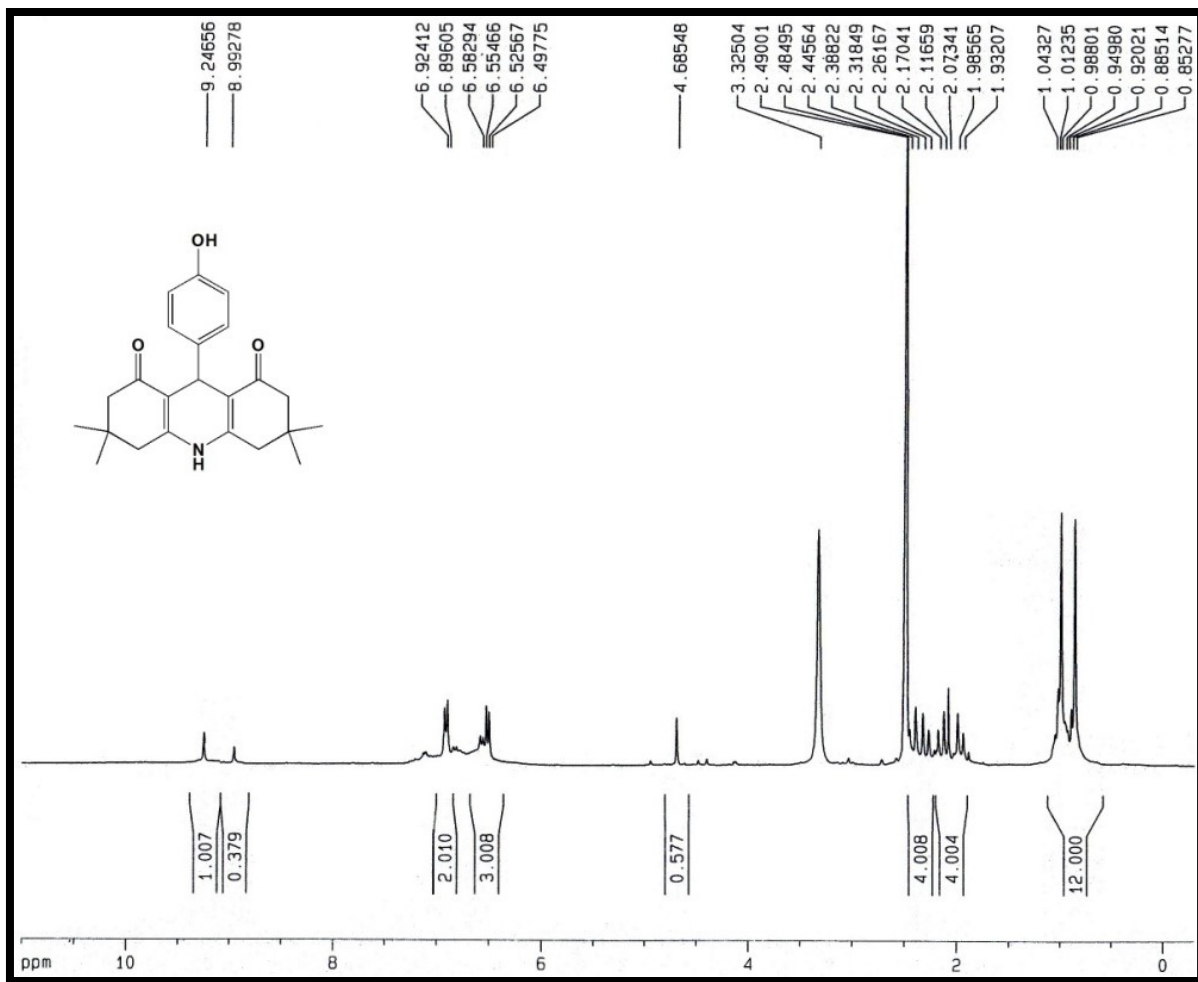

**Fig. S66.** <sup>1</sup>H NMR of 9-(4-hydroxyphenyl)-3,3,6,6-tetramethyl-3,4,6,7,9,10-hexahydroacridine-1,8(2H,5H)-dione

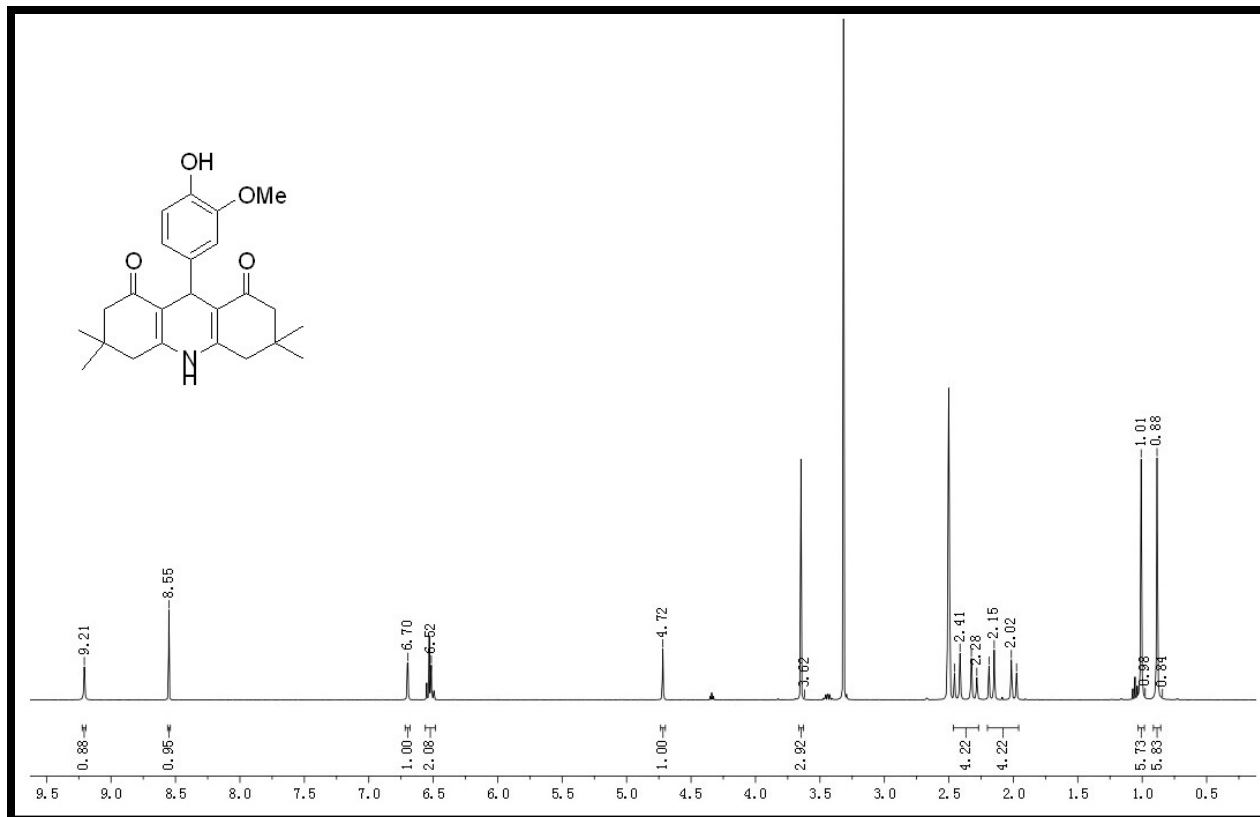

**Fig. S67.** <sup>1</sup>H NMR of 9-(4-hydroxy-3-methoxyphenyl)-3,3,6,6-tetramethyl-3,4,6,7,9,10-hexahydroacridine-1,8(2H,5H) dione

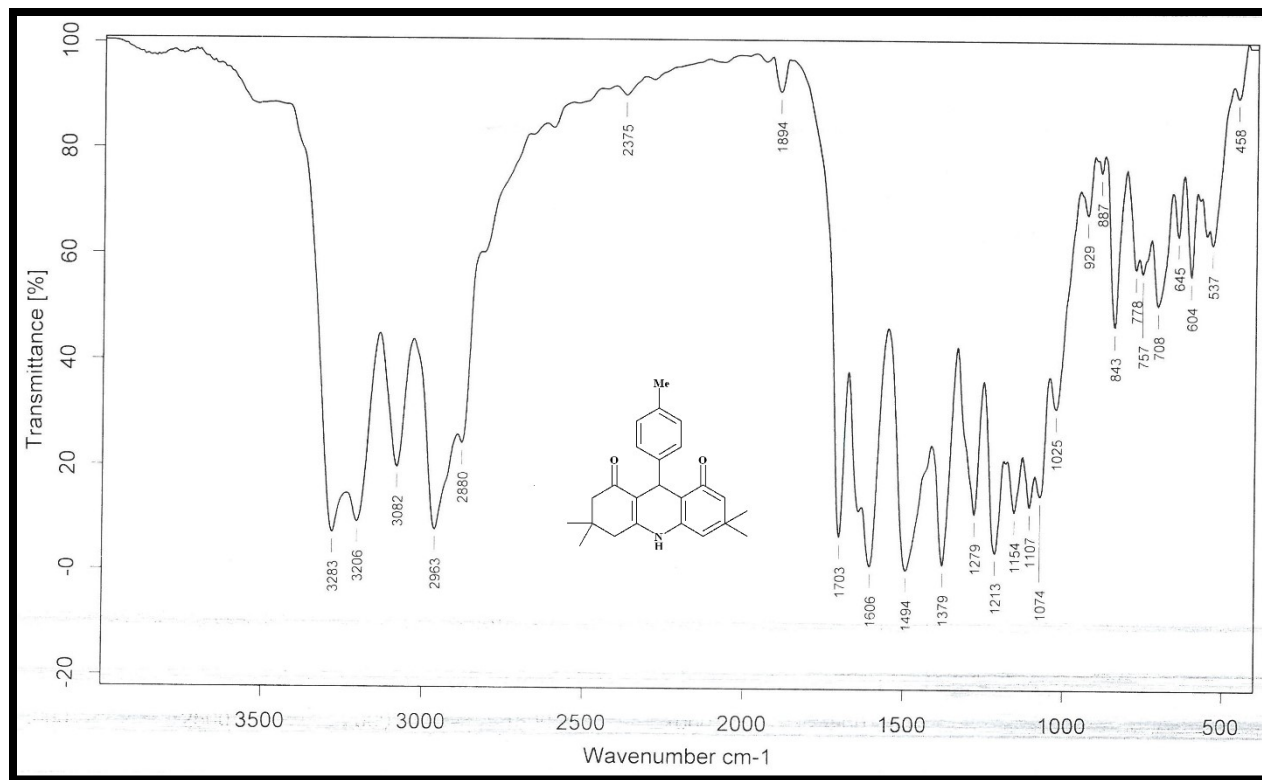

**Fig. S68.** FT-IR of 3,3,6,6-tetramethyl-9-(p-tolyl)-3,4,6,7,9,10-hexahydroacridine-1,8(2H,5H)-dione

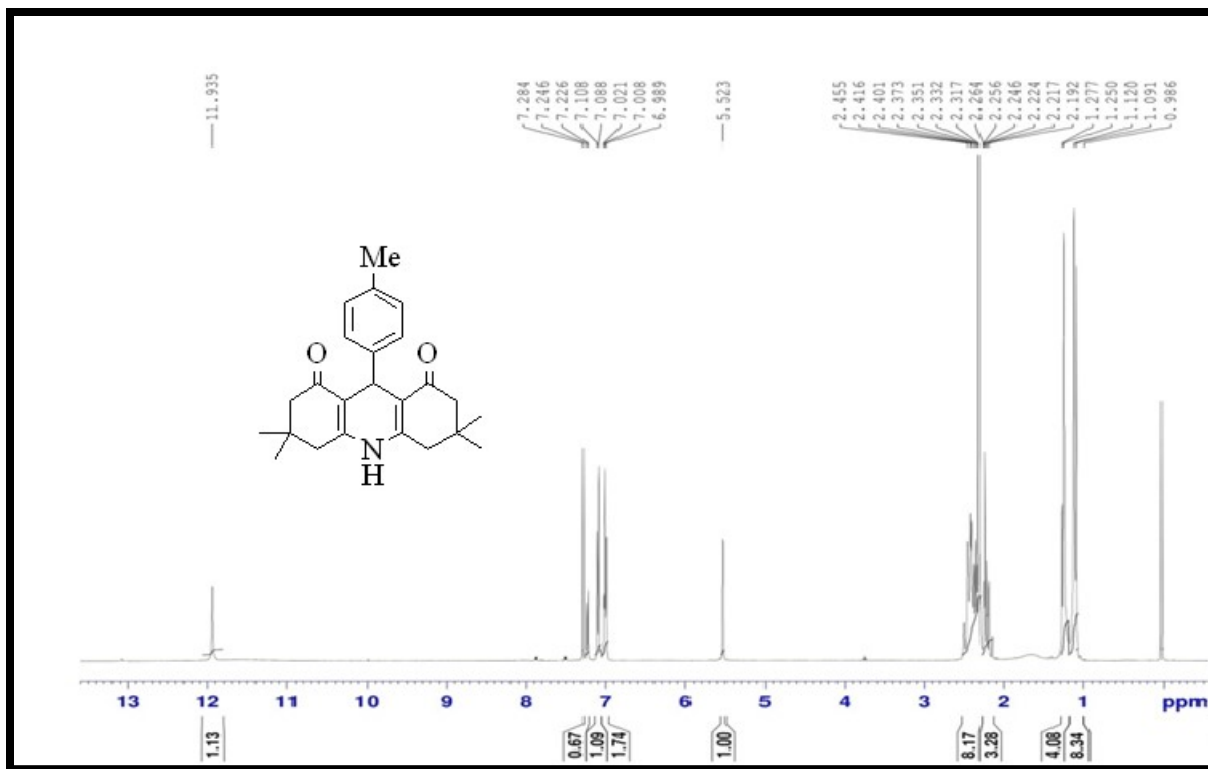

**Fig. S69.** <sup>1</sup>H NMR of 3,3,6,6-tetramethyl-9-(p-tolyl)-3,4,6,7,9,10-hexahydroacridine-1,8(2H,5H)-dione

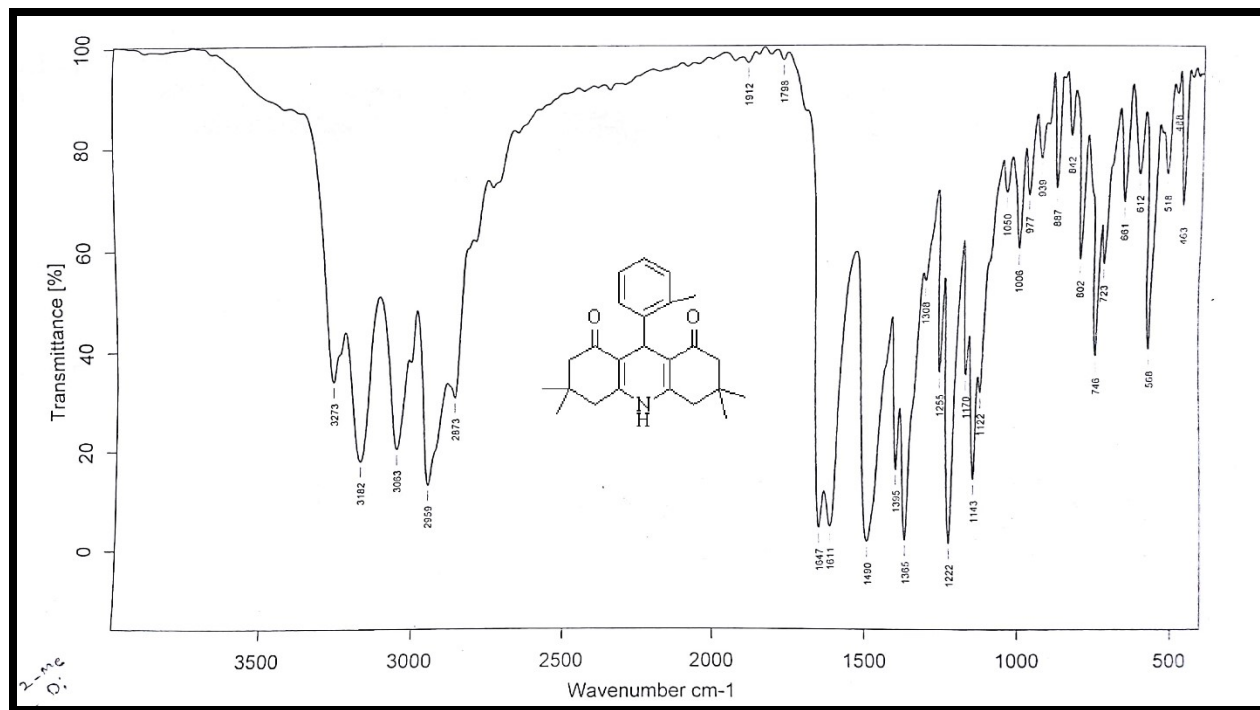

**Fig. S70.** FT-IR of 3,3,6,6-tetramethyl-9-(o-tolyl)-3,4,6,7,9,10-hexahydroacridine-1,8(2H,5H)-dione

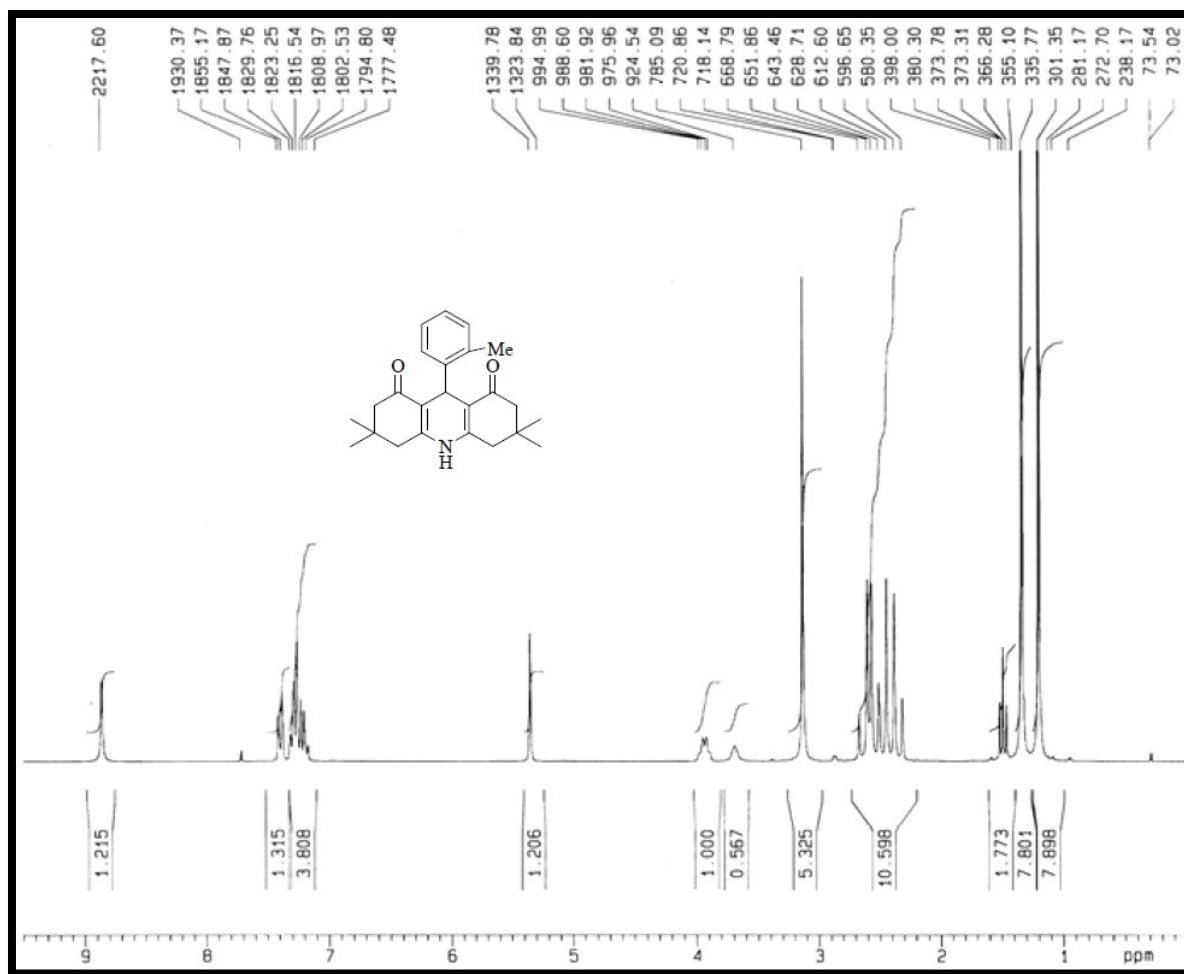

**Fig. S71.** <sup>1</sup>H NMR of 3,3,6,6-tetramethyl-9-(o-tolyl)-3,4,6,7,9,10-hexahydroacridine-1,8(2H,5H)-dione



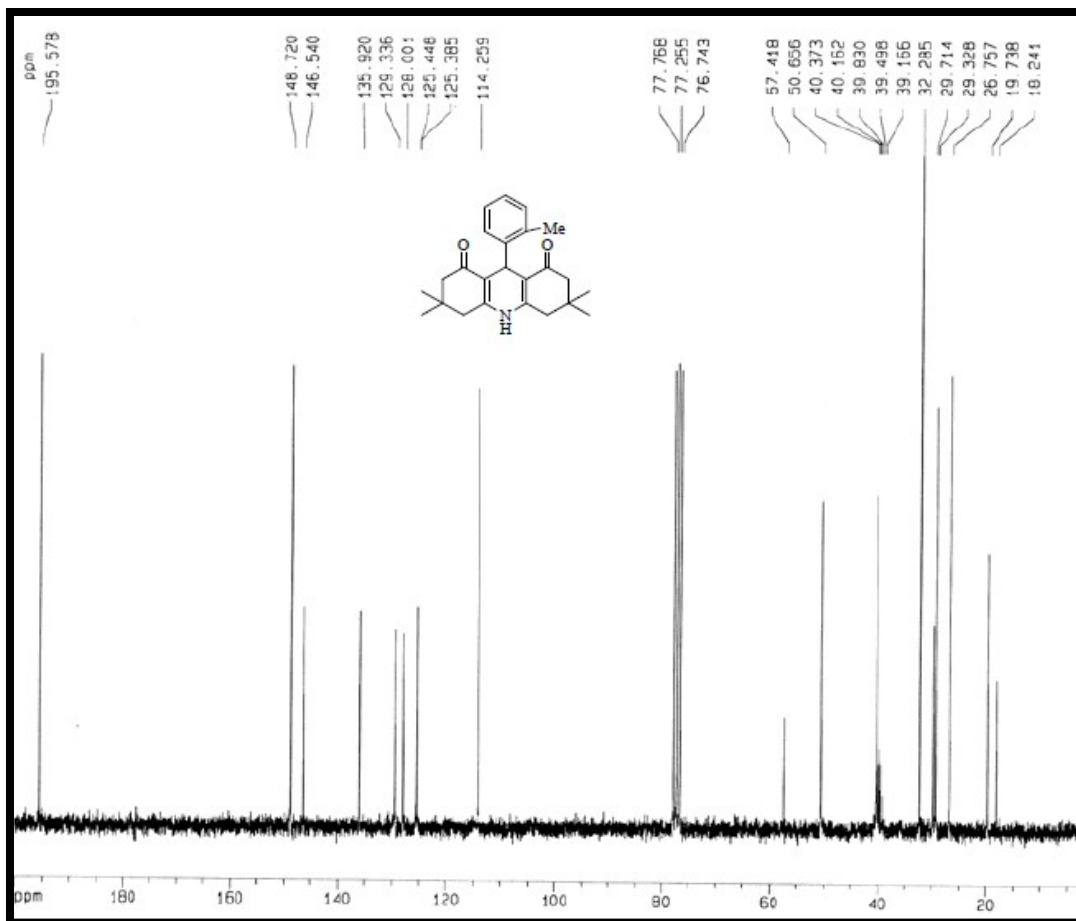

**Fig. S72.**  $^{13}\text{C}$  NMR of 3,3,6,6-tetramethyl-9-(o-tolyl)-3,4,6,7,9,10-hexahydroacridine-1,8(2H,5H)-dione

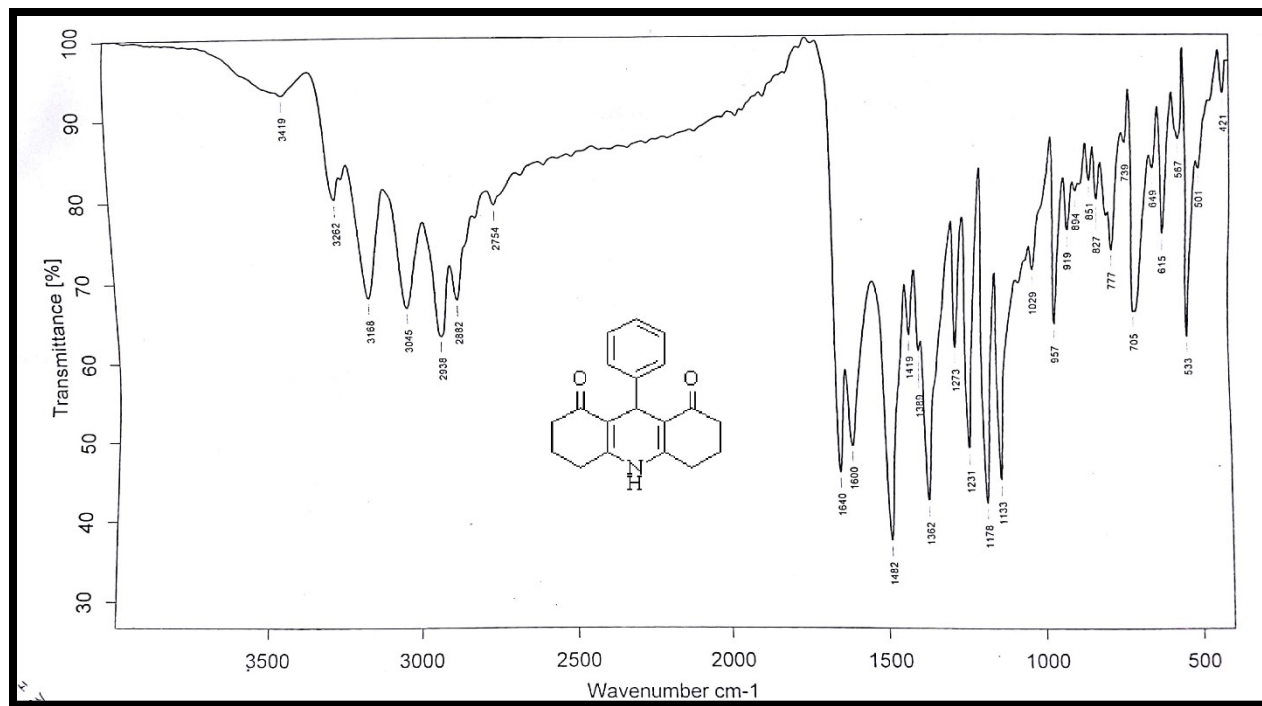

**Fig. S73.** FT-IR of 9-phenyl-3,4,6,7,9,10-hexahydroacridine-1,8(2H,5H)-dione

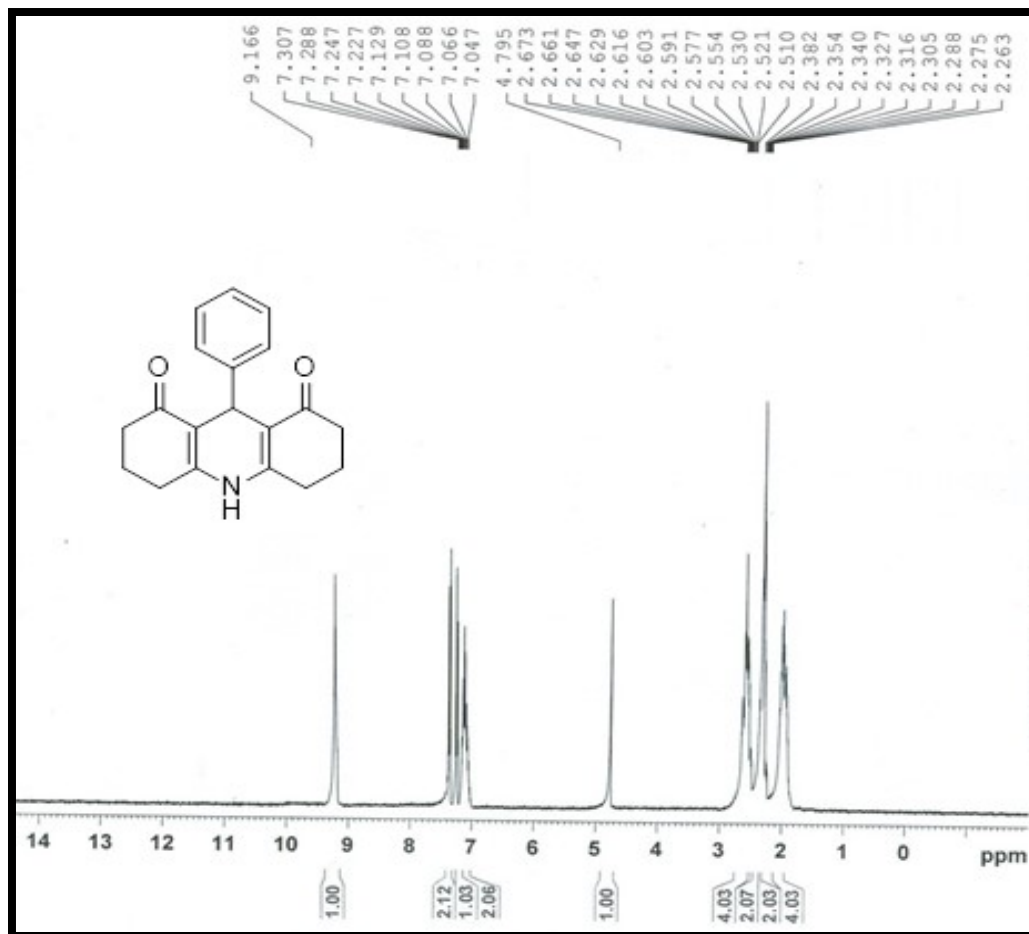

**Fig. S74.** <sup>1</sup>H NMR of 9-phenyl-3,4,6,7,9,10-hexahydroacridine-1,8(2H,5H)-dione

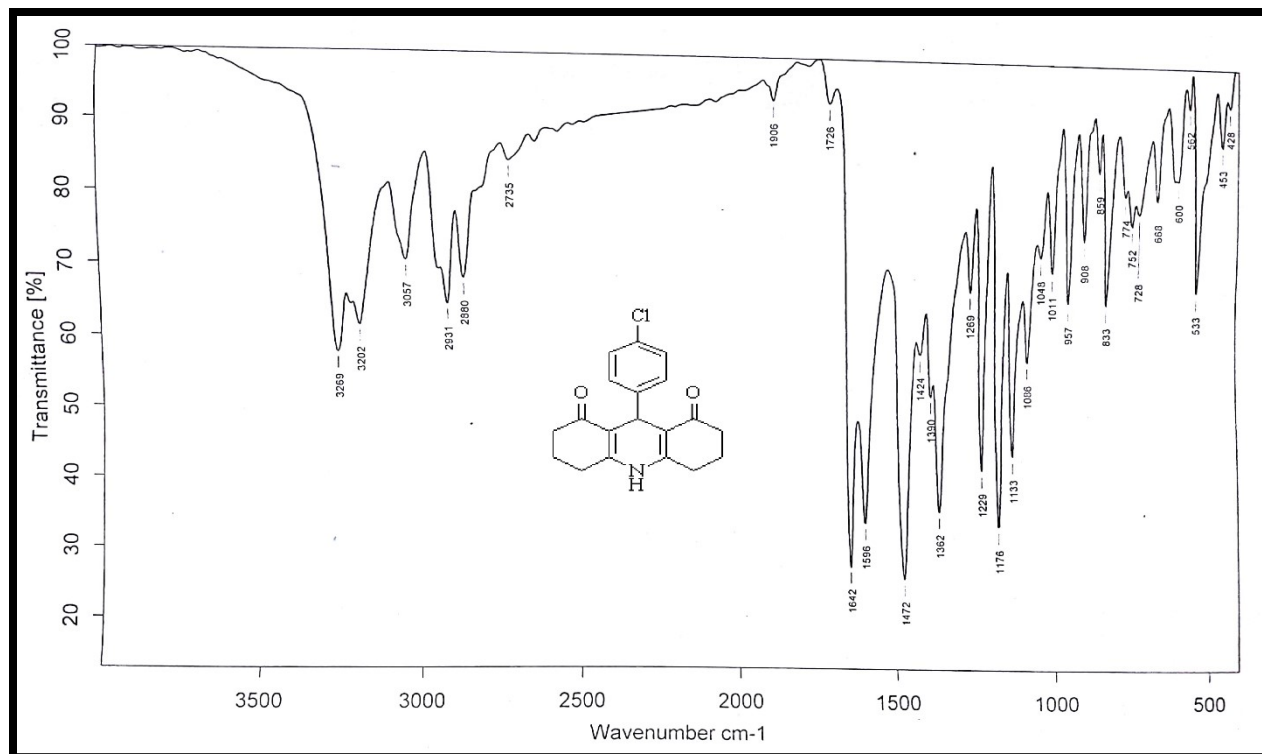

**Fig. S75.** FT-IR of 9-(4-chlorophenyl)-3,4,6,7,9,10-hexahydroacridine-1,8(2H,5H)-dione

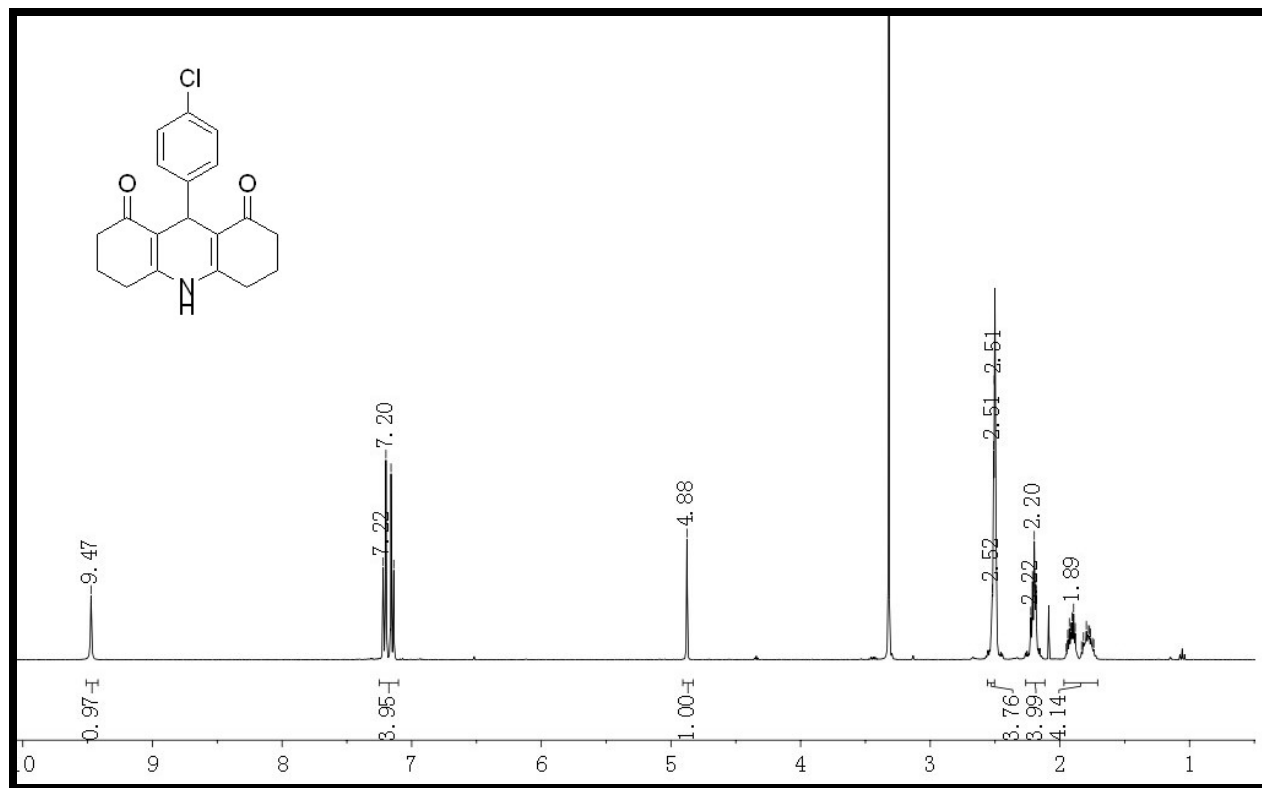

**Fig. S76.** <sup>1</sup>H NMR of 9-(4-chlorophenyl)-3,4,6,7,9,10-hexahydroacridine-1,8(2H,5H)-dione

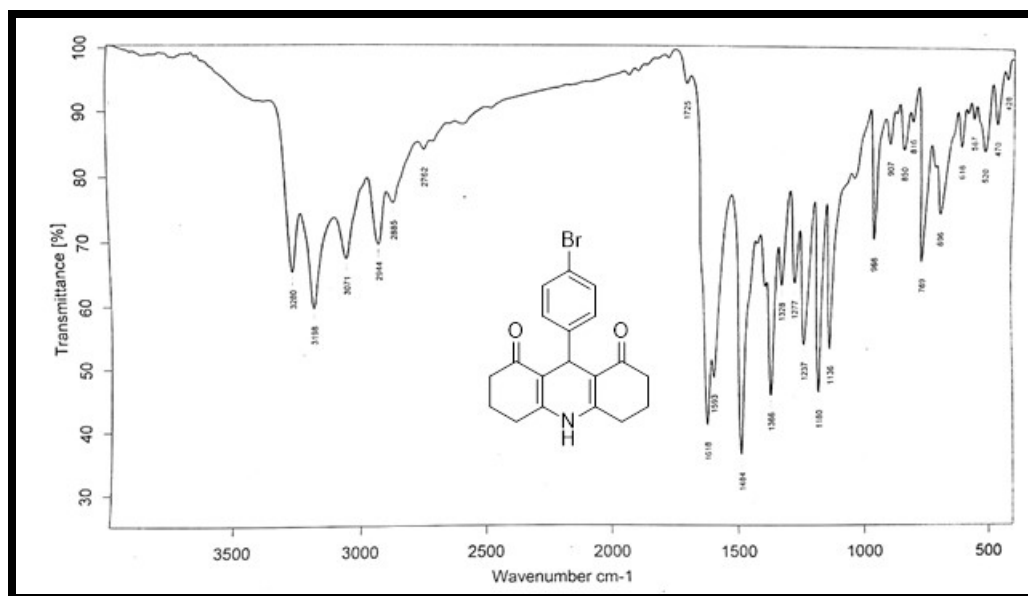

**Fig. S77.** FT-IR of 9-(4-bromophenyl)-3,4,6,7,9,10-hexahydroacridine-1,8(2H,5H)-dione

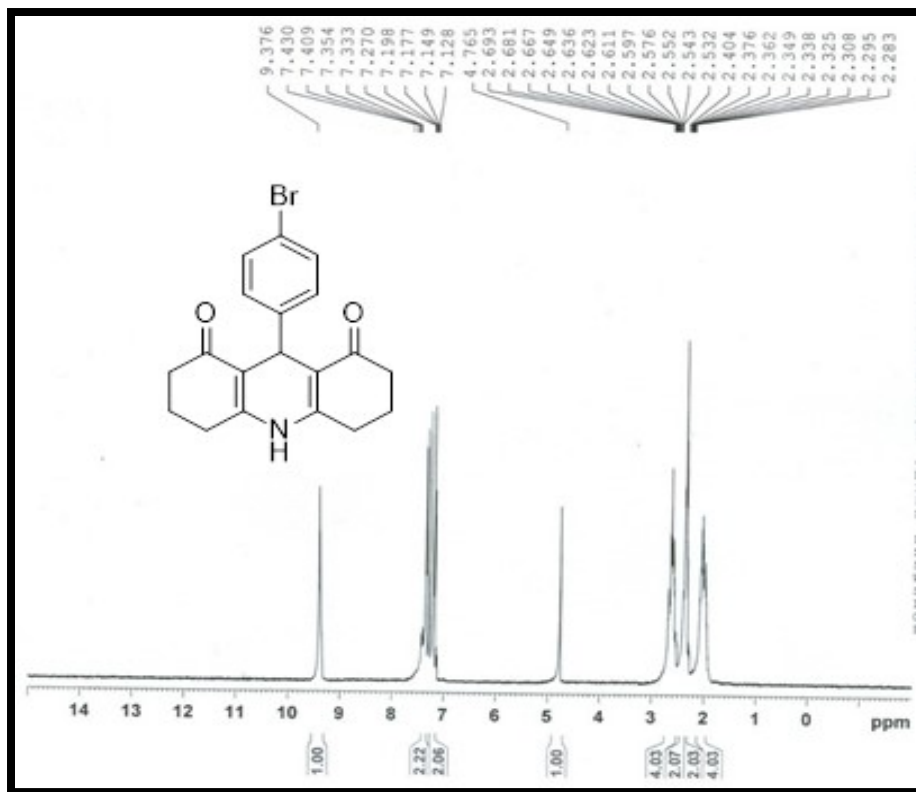

Fig. S78. <sup>1</sup>H NMR of 9-(4-bromophenyl)-3,4,6,7,9,10-hexahydroacridine-1,8(2H,5H)-dione

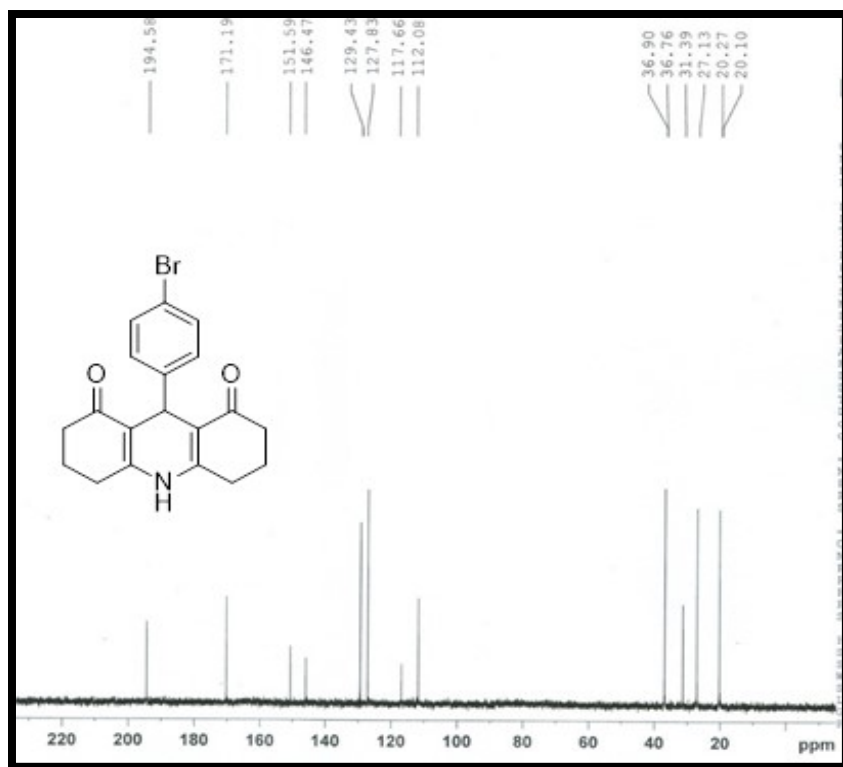

**Fig. S79.** <sup>13</sup>C NMR of 9-(4-bromophenyl)-3,4,6,7,9,10-hexahydroacridine-1,8(2H,5H)-dione



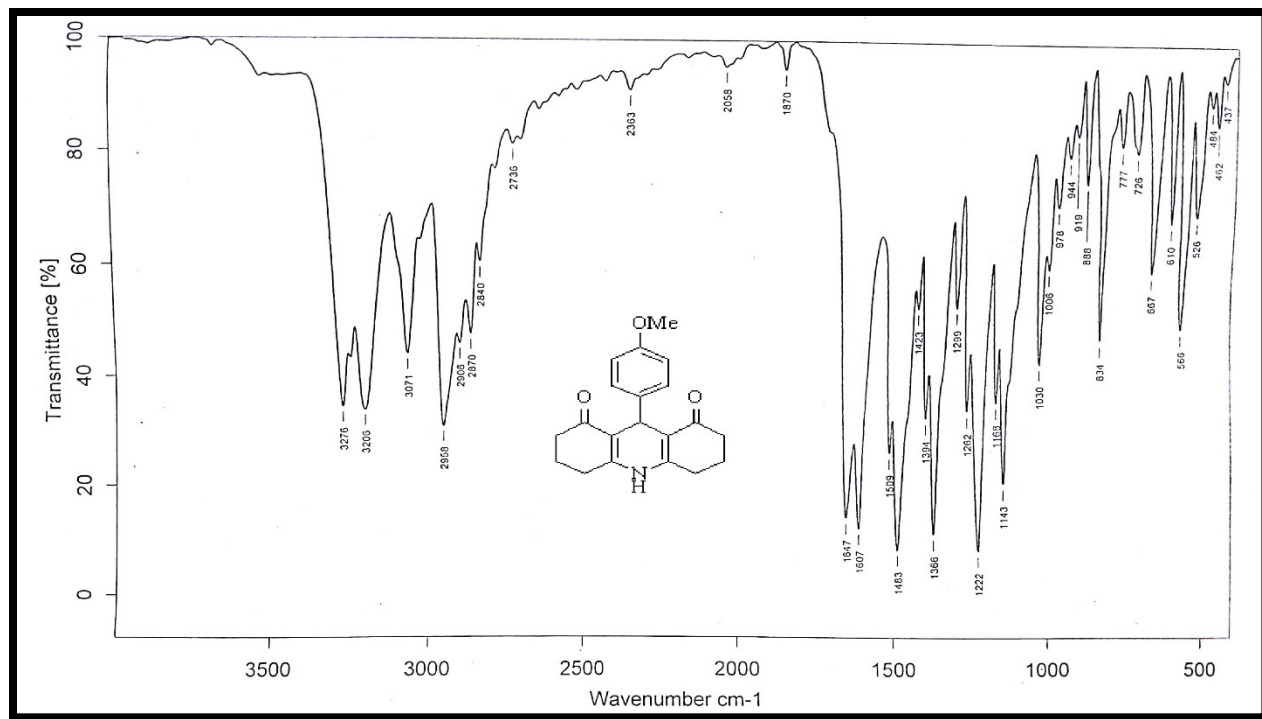

**Fig. S80.** FT-IR of 9-(4-methoxyphenyl)-3,4,6,7,9,10-hexahydroacridine-1,8(2H,5H)-dione

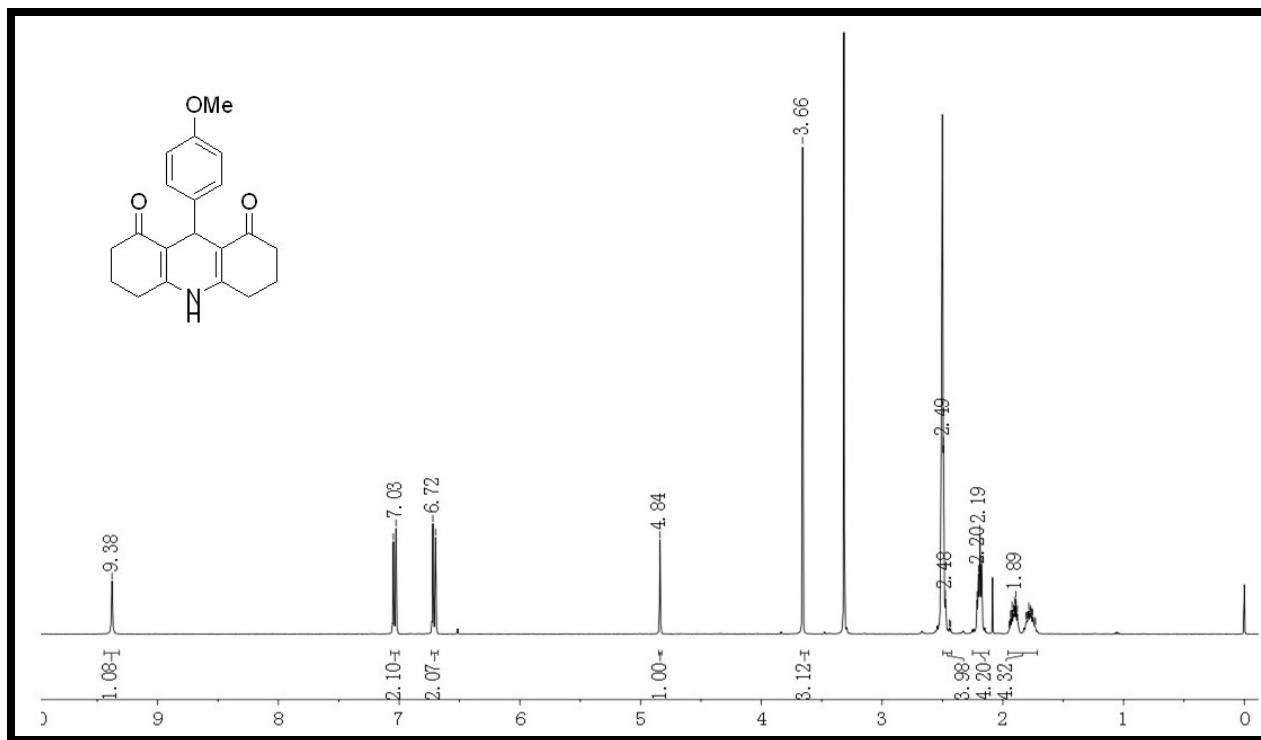

**Fig. S81.** <sup>1</sup>H NMR of 9-(4-methoxyphenyl)-3,4,6,7,9,10-hexahydroacridine-1,8(2H,5H)-dione

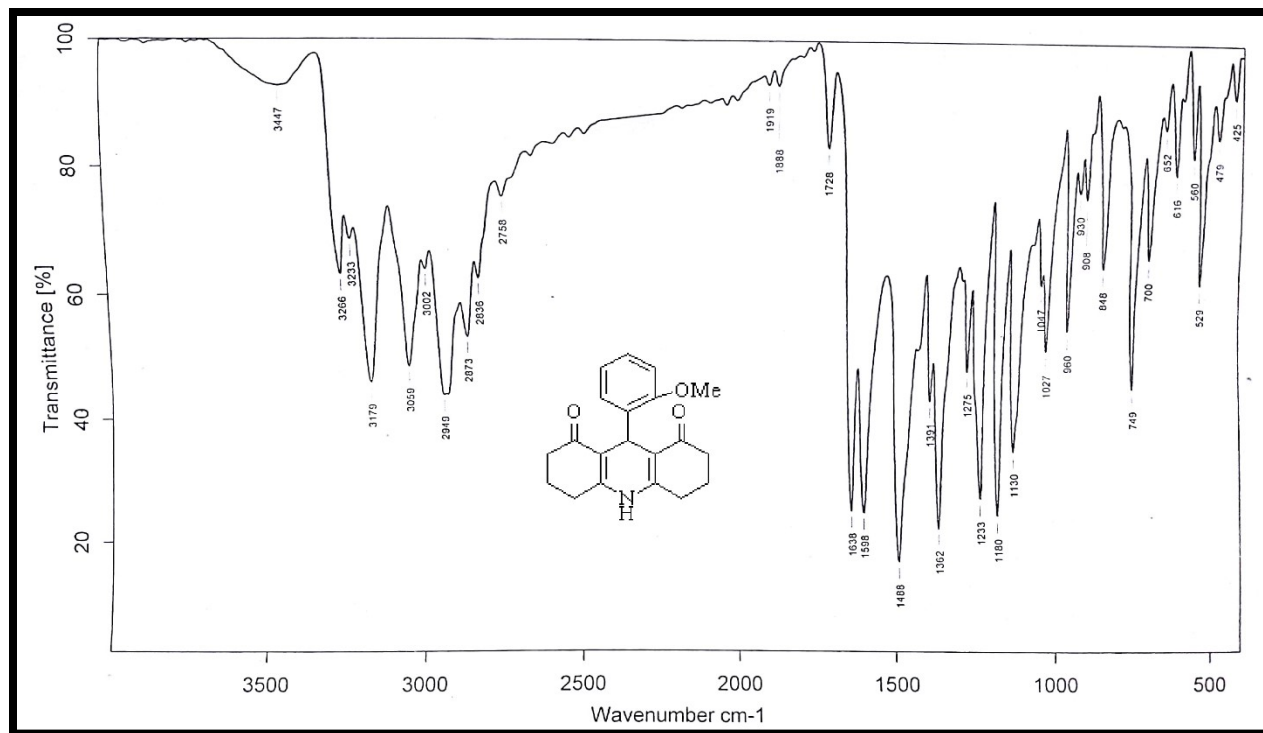

**Fig. S82.** FT-IR of 9-(2-methoxyphenyl)-3,4,6,7,9,10-hexahydroacridine-1,8(2H,5H)-dione

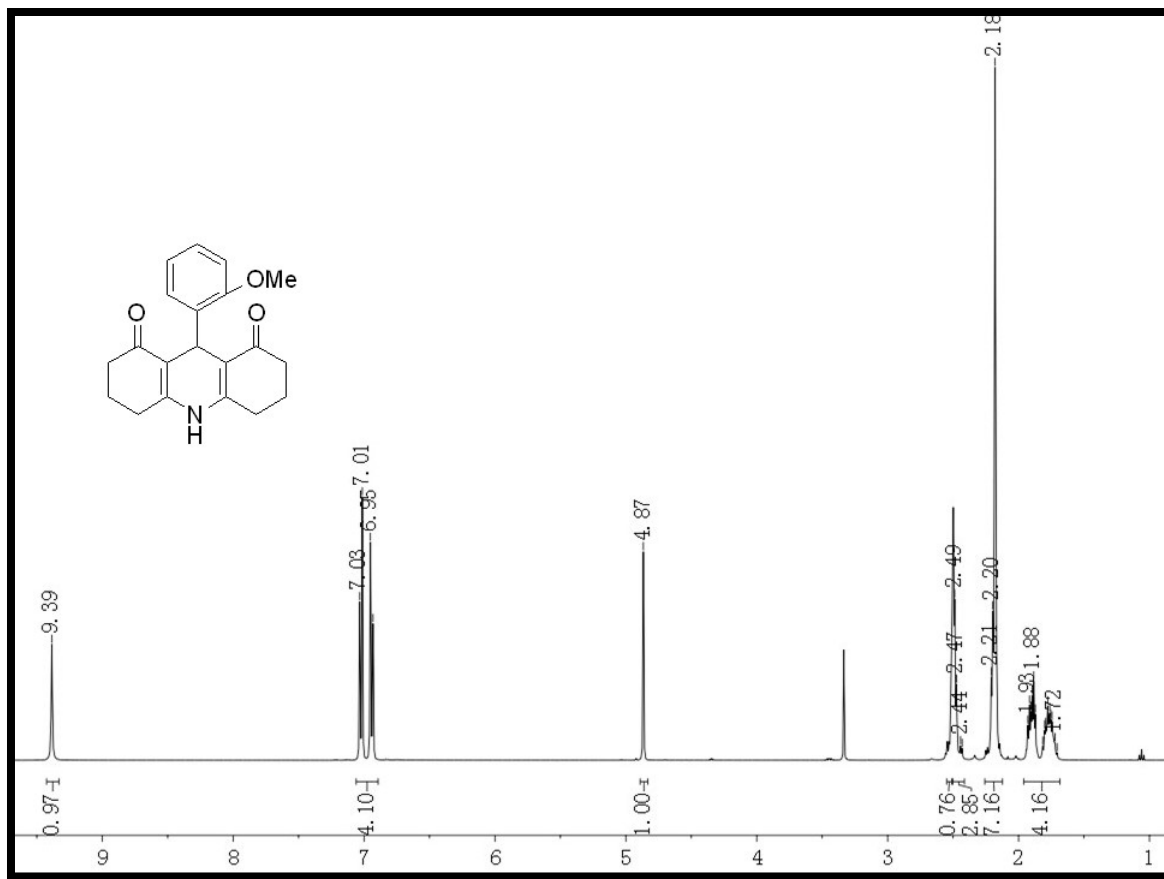

**Fig. S83.** <sup>1</sup>H NMR of 9-(2-methoxyphenyl)-3,4,6,7,9,10-hexahydroacridine-1,8(2H,5H)-dione

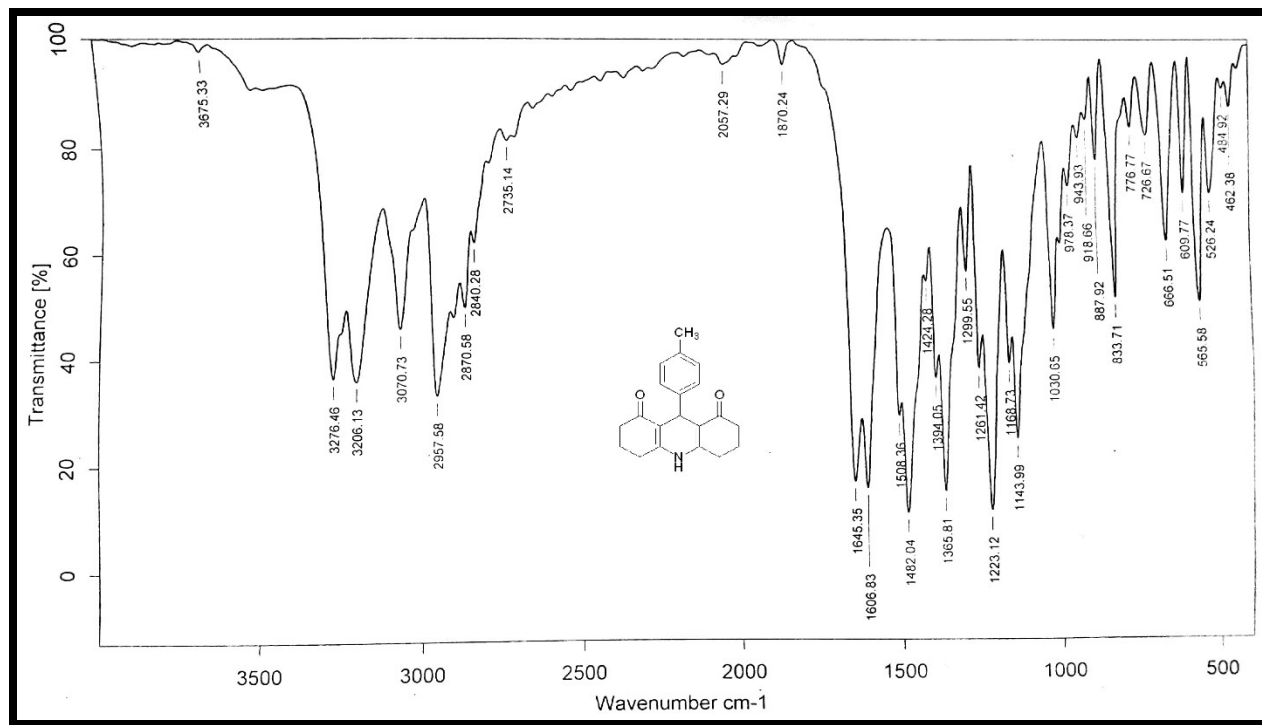

**Fig. S84.** FT-IR of 3,3,6,6-tetramethyl-9-(p-tolyl)-3,4,6,7,9,10-hexahydroacridine-1,8(2H,5H)-dione

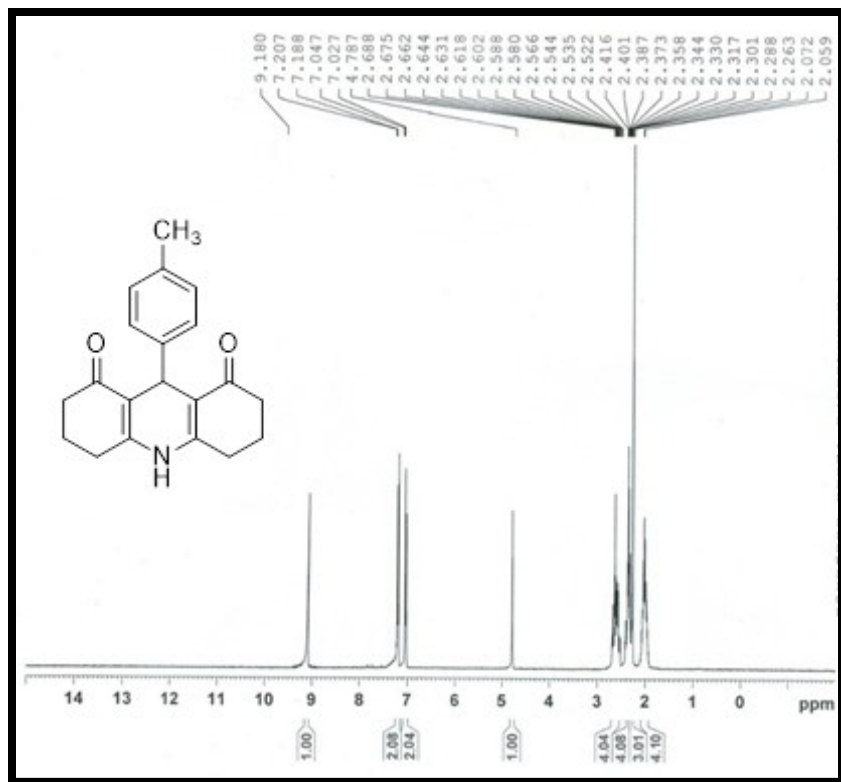

**Fig. S85.** <sup>1</sup>H NMR of 3,3,6,6-tetramethyl-9-(p-tolyl)-3,4,6,7,9,10-hexahydroacridine-1,8(2H,5H)-dione

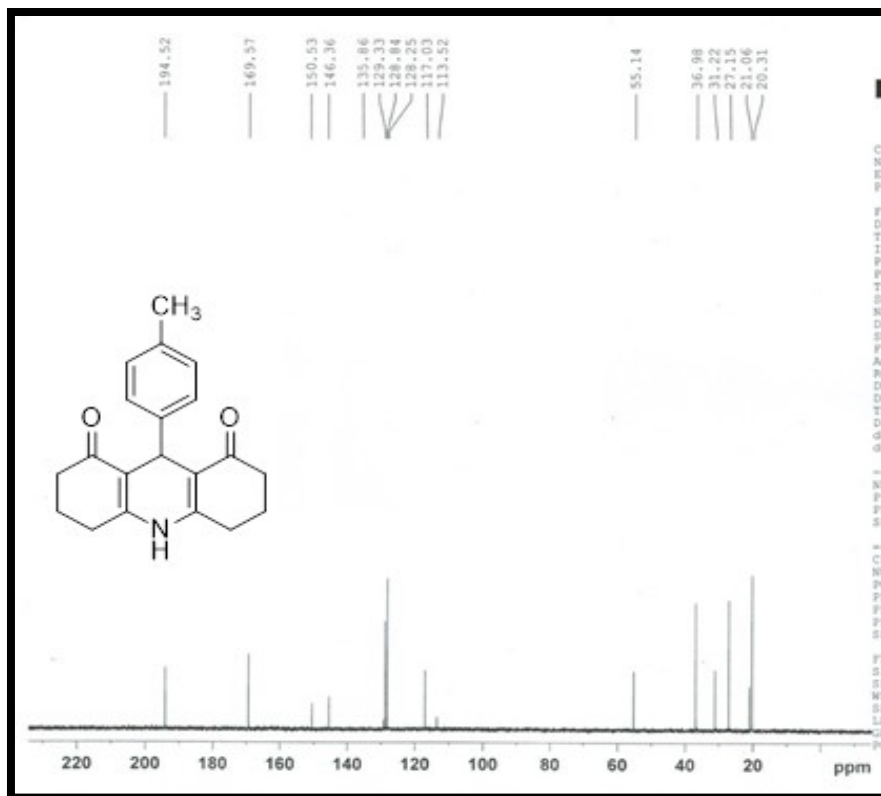

**Fig. S86.** <sup>13</sup>C NMR of 3,3,6,6-tetramethyl-9-(p-tolyl)-3,4,6,7,9,10-hexahydroacridine-1,8(2H,5H)-dione

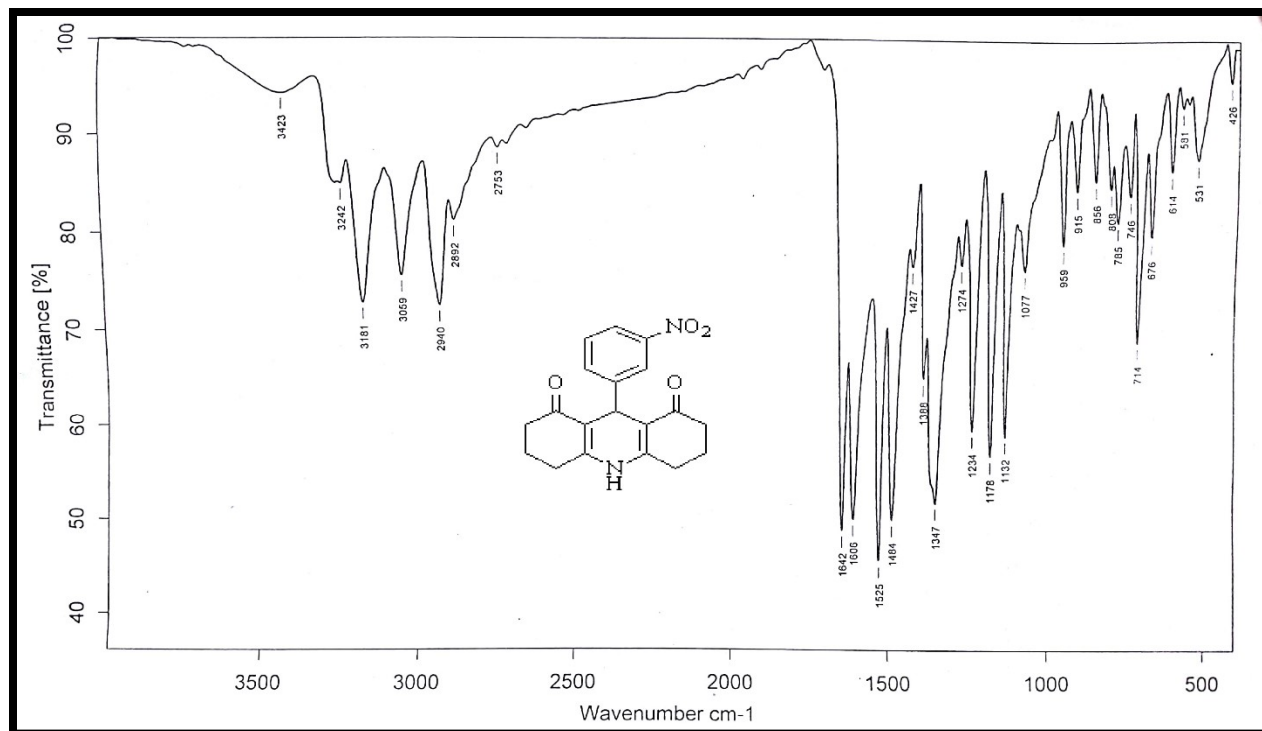

**Fig. S87.** FT-IR of 9-(3-nitrophenyl)-3,4,6,7,9,10-hexahydroacridine-1,8(2H,5H)-dione



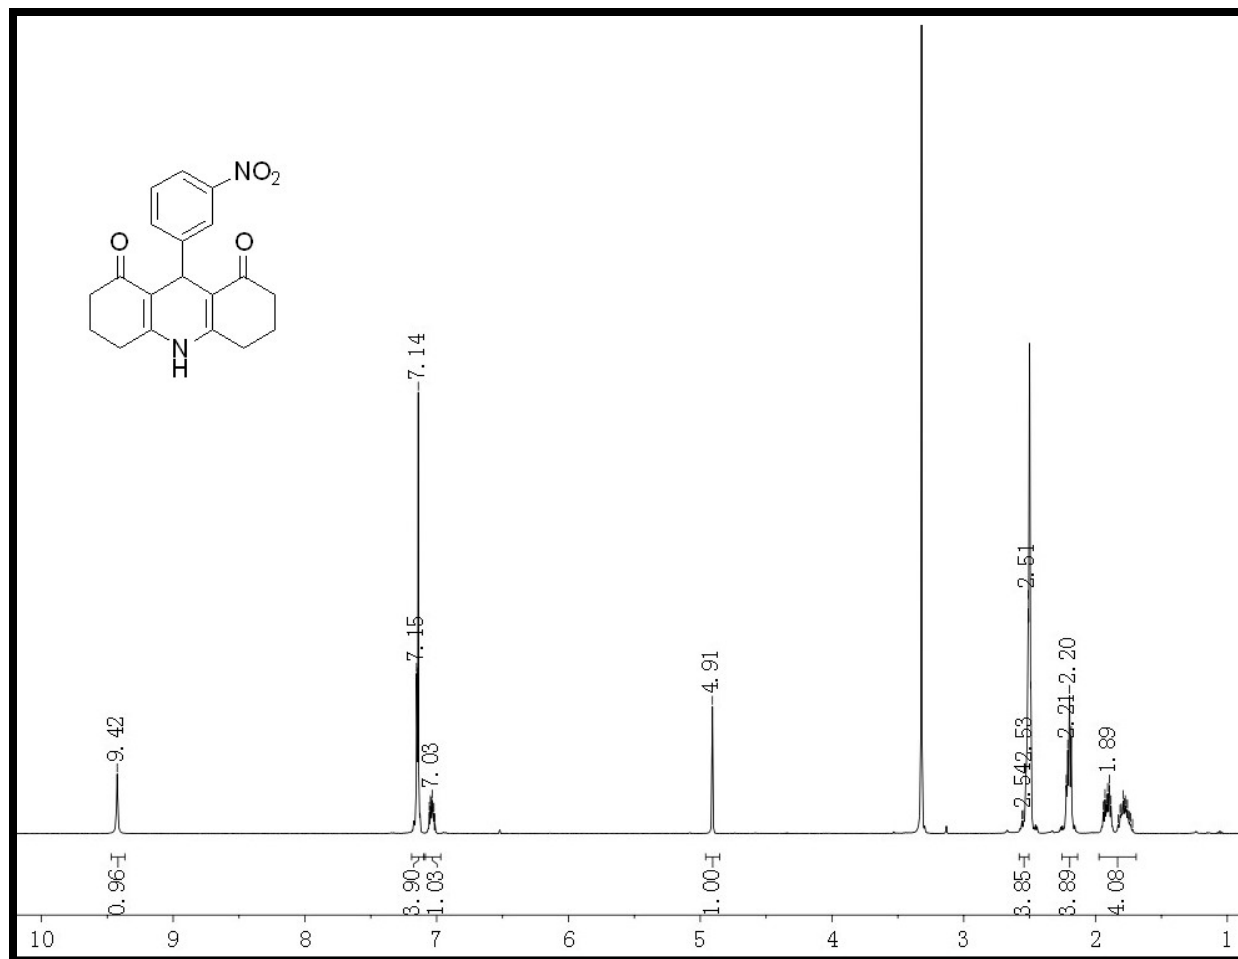

**Fig. S88.** <sup>1</sup>H NMR of 9-(3-nitrophenyl)-3,4,6,7,9,10-hexahydroacridine-1,8(2*H*,5*H*)-dione

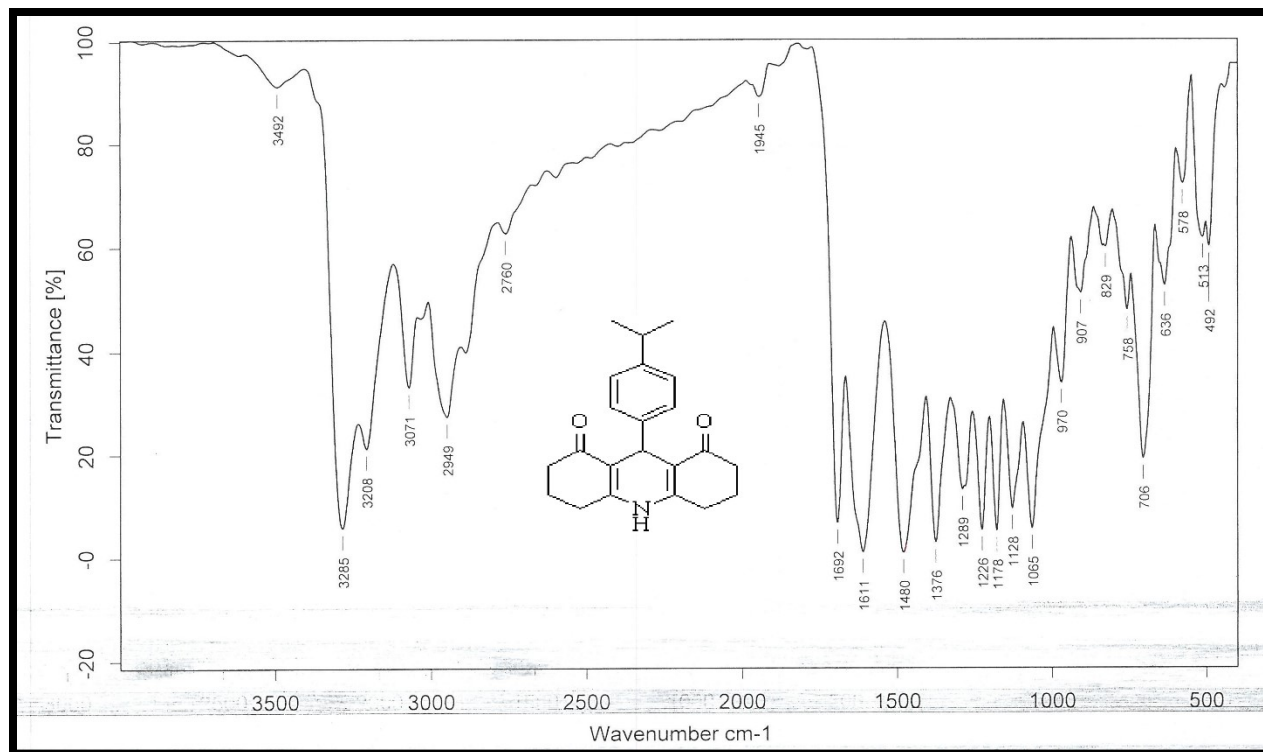

**Fig. S89.** FT-IR of 9-(4-isopropylphenyl)-3,4,6,7,9,10-hexahydroacridine-1,8(2H,5H)-dione

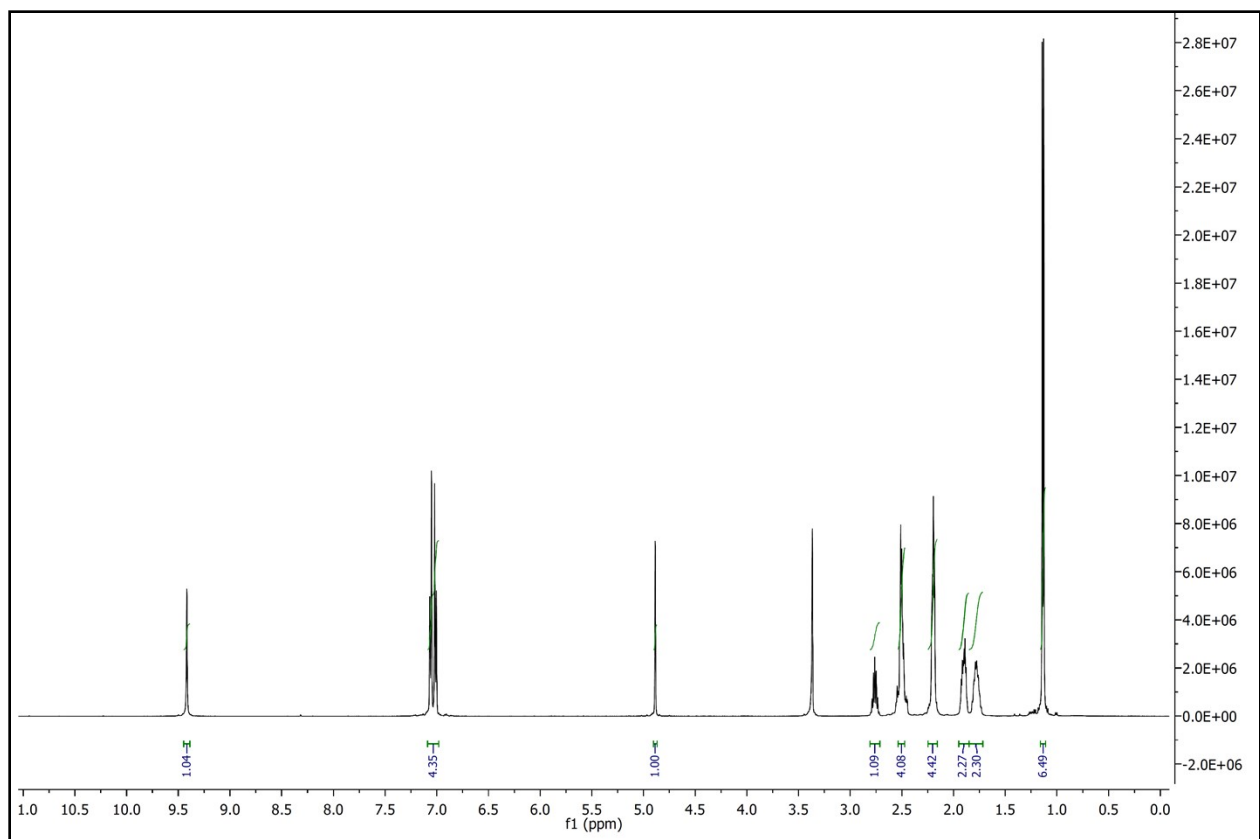

**Fig. S90.** <sup>1</sup>H NMR of 9-(4-Isopropylphenyl)-3,4,6,7,9,10-hexahydroacridine-1,8(2*H*,5*H*)-dione

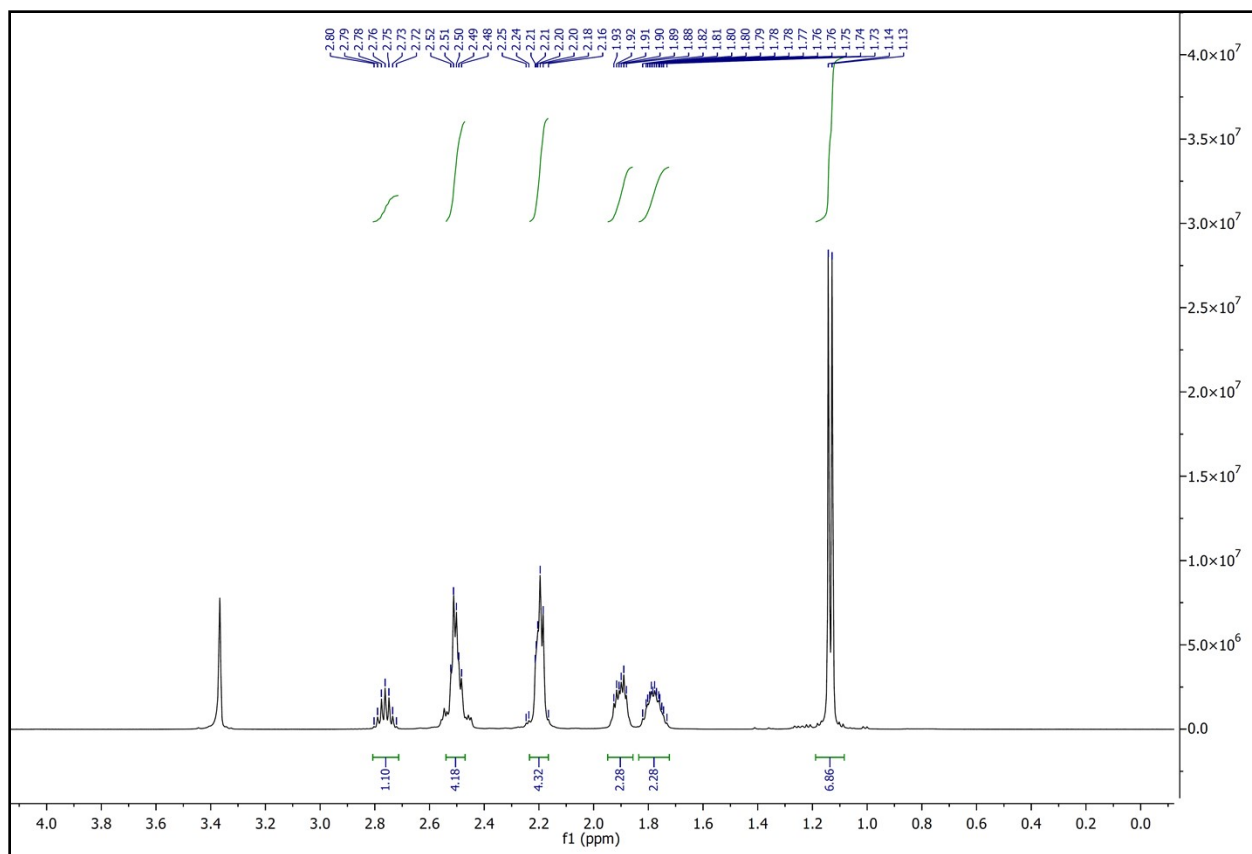

**Fig. S91.**  $^1\text{H}$ NMR of 9-(4-Isopropylphenyl)-3,4,6,7,9,10-hexahydroacridine-1,8(2*H*,5*H*)-dione

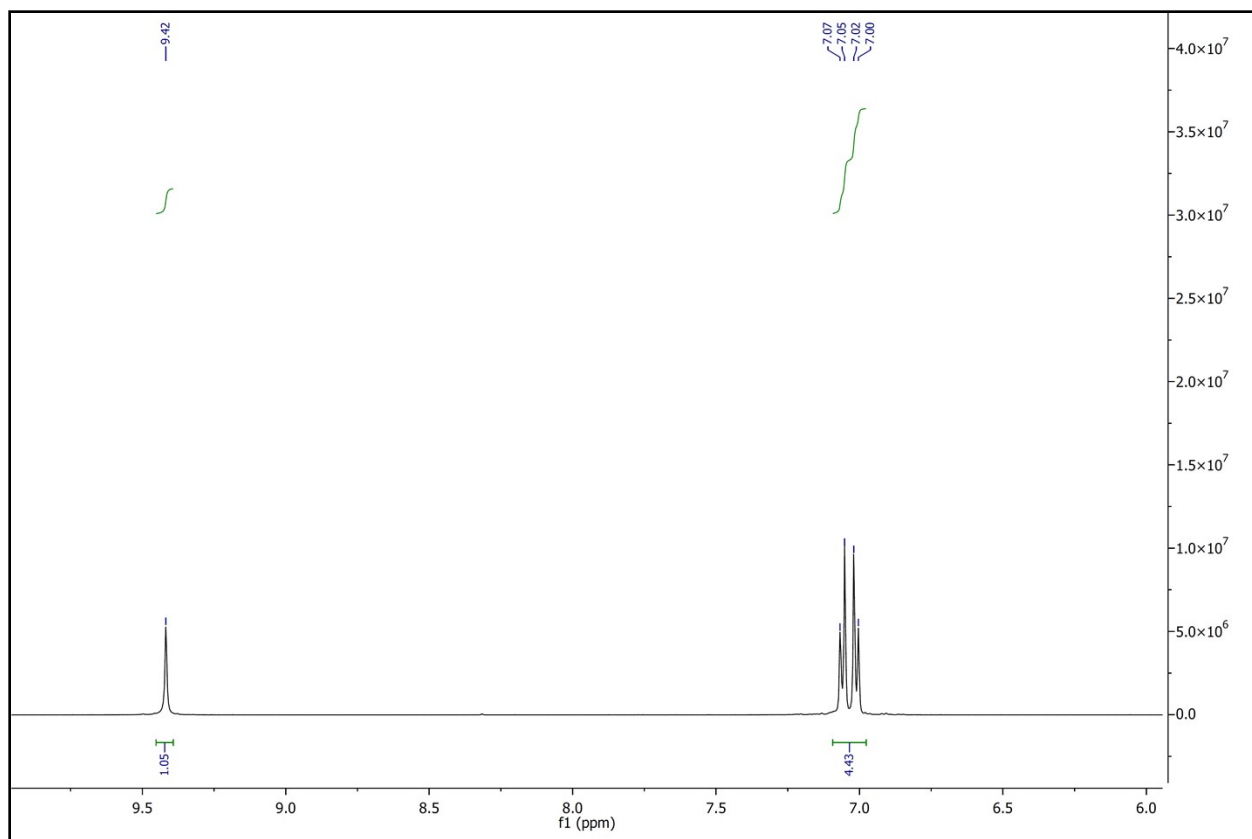

**Fig. S92.** <sup>1</sup>H NMR of 9-(4-Isopropylphenyl)-3,4,6,7,9,10-hexahydroacridine-1,8(2*H*,5*H*)-dione

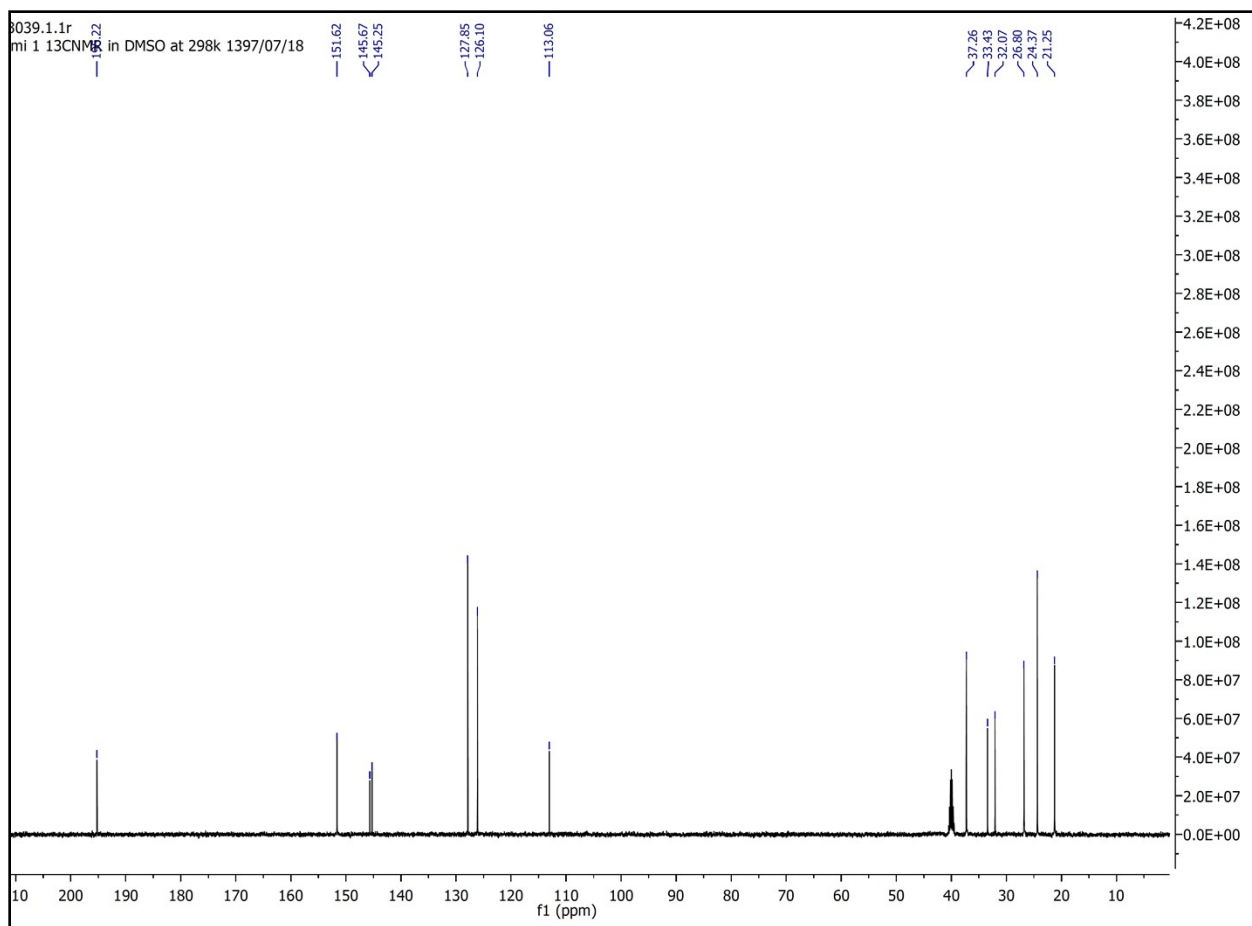

**Fig. S93.**  $^{13}\text{C}$ NMR of 9-(4-Isopropylphenyl)-3,4,6,7,9,10-hexahydroacridine-1,8(2*H*,5*H*)-dione
